# Supplementary material
Source: PubMed Central journal article supplement (PMC3662511)

## SUPPLEMENTARY DATA

FIG. S1. Geographic distribution of all populations used in this study and listed in Supplementary Data Table S1.

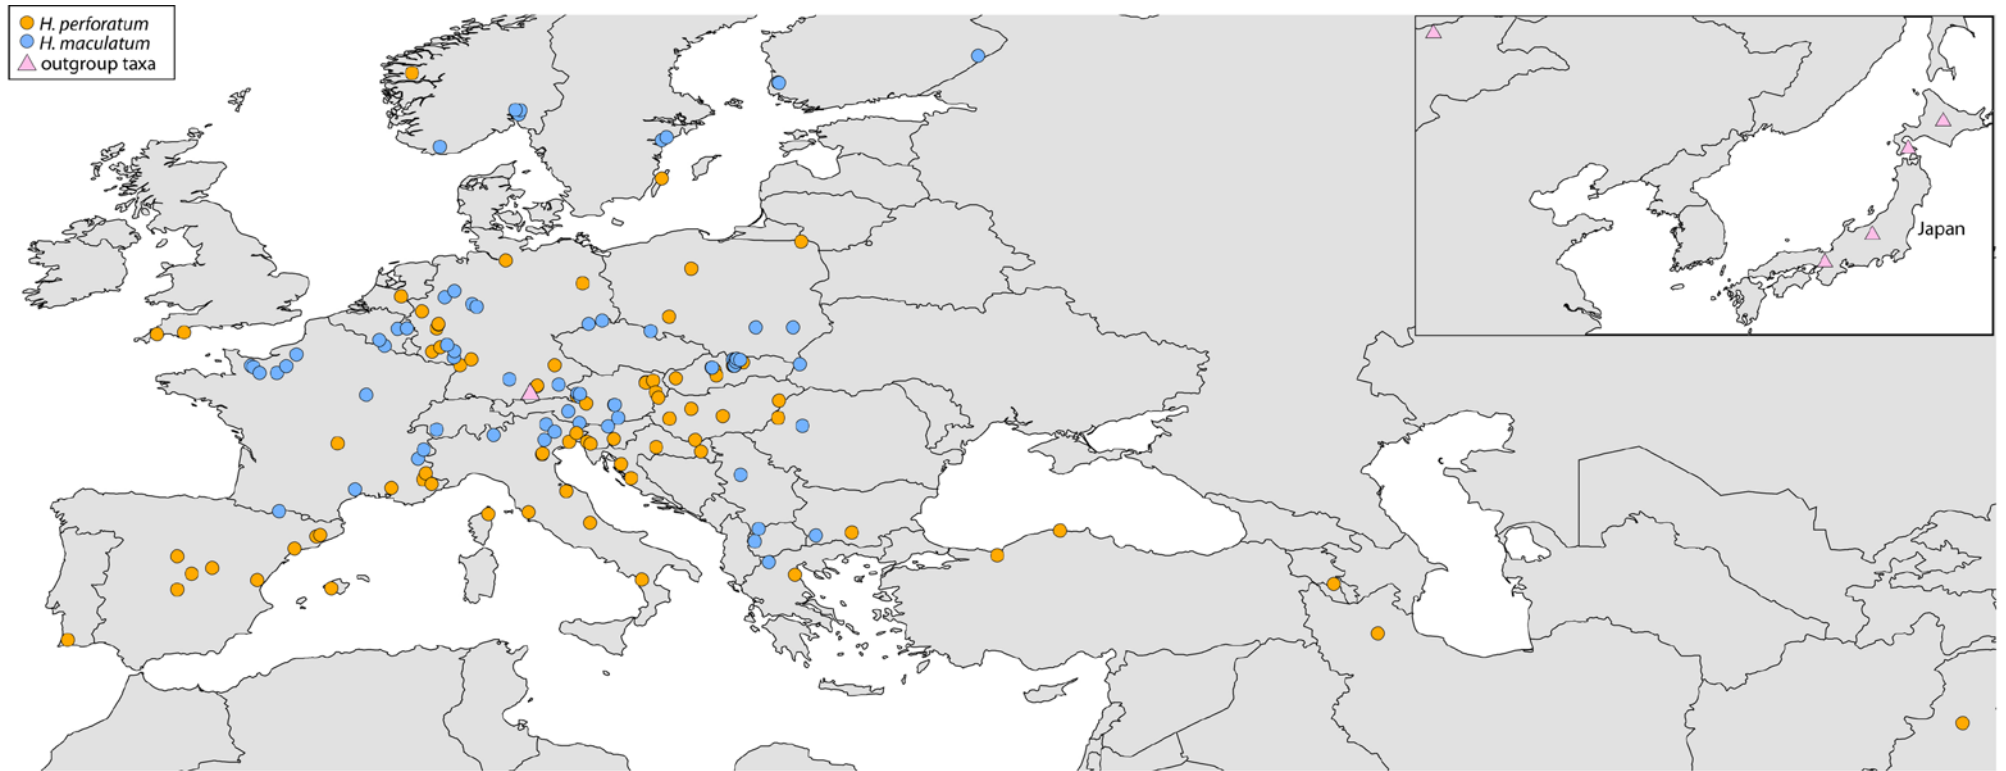

Supplement: supp_mct065_mct065supp_fig1.pdf [file supp_mct065_mct065supp_fig1.pdf]
