# Supplementary material
Source: PubMed Central journal article supplement (PMC3662511)

## SUPPLEMENTARY DATA

FIG. S3. Searching for the optimal  $K$  using Structure-Sum for the subsequent analysis of the AFLP data. The results of Structure using the admixture model and correlated allele frequencies (A–C), and independent allele frequencies (D–F) are shown. Plots A+D illustrate the search strategy of Evanno *et al.* (2005) using delta  $K$ . Plots B+E show the similarity coefficient with standard deviations as used in Nordborg *et al.* (2005). Plots C+F show the  $\ln P(D)$  as it is used in Structure (Falush *et al.*, 2007).

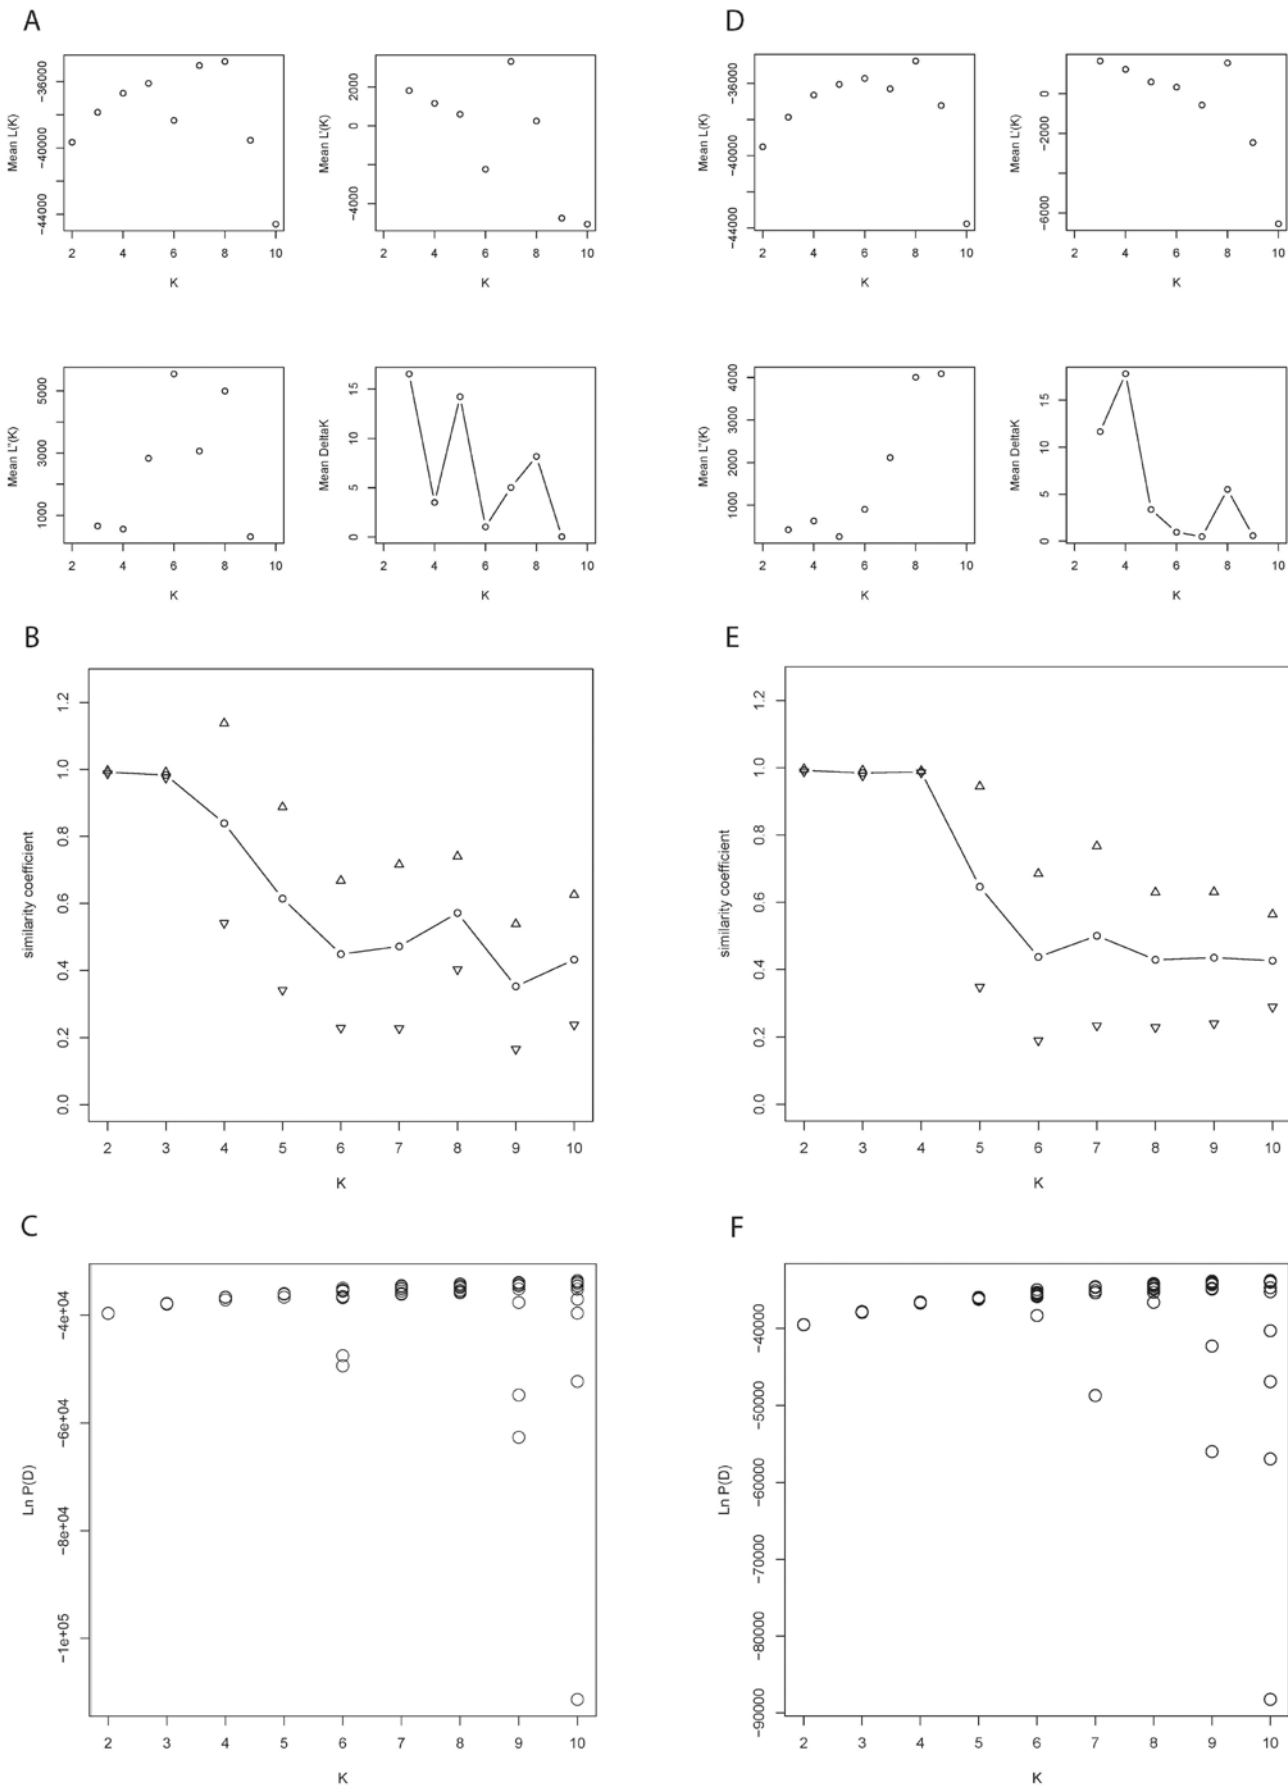

Supplement: supp_mct065_mct065supp_fig3.pdf [file supp_mct065_mct065supp_fig3.pdf]
