# Supplementary material
Source: PubMed Central journal article supplement (PMC3662511)
Supplement: supp_mct065_mct065supp_table2.pdf [file supp_mct065_mct065supp_table2.pdf]

## SUPPLEMENTARY DATA

TABLE S2. Summary of the scored continuous (c) and discrete (d) morphological characters and the corresponding targeted organs. Characters (3), (5), (9) and (11) (*in italics*) were finally excluded from multivariate analysis, because of missing variation. The data matrix is given after the list of characters.

### **Leaves: Leaves at the stem at middle height of the plant:**

- 1) length of leaves, c [mm]
- 2) width of leaves, c [mm]
- 3) *presence/absence of black marginal glands, d (0, 1)*
- 4) density of black glands in the middle of the leaves, c [number per cm<sup>2</sup>]
- 5) *density of black glands on the whole leaf, c [number per cm<sup>2</sup>]*
- 6) density of transparent glands, c [number per cm<sup>2</sup>]

### **Second leaf on side branches in the middle of the whole plant**

- 7) length of leaves, c [mm]
- 8) width of leaves, c [mm]
- 9) *presence/absence of black marginal glands, d (0, 1)*
- 10) density of black glands in the middle of the leaves, c [number per cm<sup>2</sup>]
- 11) *density of black glands on the whole leaf, c [number per cm<sup>2</sup>]*
- 12) density of transparent glands, c [number per cm<sup>2</sup>]

### **Stem:**

- 13) number of stripes in the lower half of the plant, d (1-4)
- 14) number of stripes in the upper part of the plants, mostly the main inflorescence shoot, d (1-4)
- 15) presence of black glands, d (1,0)
- 16) angle of the primary inflorescence branches, c

### **Petals:**

- 17) presence of types of glands, d (1: transparent glands only, 2: transparent and black glands, 3: black glands only)
- 18) black glands characters, d (1: glands as dots at margin only, 2: glands all over the surface (stripes) and at the margins (dots), 3: glands all over the surface (dots and stripes) and the margins (dots), 4 glands all over the surface (dots) and the margins (dots),-5: no black glands)
- 19) length of petals, c [mm]
- 20) width of petals, c [mm]
- 21) margin of petals, d (1: entire, 2: furrowed)

### **Sepals:**

- 22) black glands characters, d (1: glands as dots only, 2: glands as dots and stripes, 3: no black glands present)
- 23) length of sepals, c [mm]
- 24) width of sepals, c [mm]
- 25) appearance of the sepal tip, d (1: hairlike tip without smooth transition, 2: hairlike tip with smooth transition, 3: acute, 4: hairlike tip and frayed, 5: round shaped, 6: broad and frayed)

**Capsule:**

26) length of capsule, c [mm]

27) width of capsule, c [mm]

28) capsule type, d (1: "perforatum type", 2: "veronense type", 3: intermediate between 1 and 2, 4: "maculatum type")

**Character matrix**

n/a: no data available

| Ind. no. | Character |       |    |       |       |      |       |      |    |       |       |     |     |     |     |      |     |     |       |      |     |     |       |      |     |      |      |     |
|----------|-----------|-------|----|-------|-------|------|-------|------|----|-------|-------|-----|-----|-----|-----|------|-----|-----|-------|------|-----|-----|-------|------|-----|------|------|-----|
|          | 1)        | 2)    | 3) | 4)    | 5)    | 6)   | 7)    | 8)   | 9) | 10)   | 11)   | 12) | 13) | 14) | 15) | 16)  | 17) | 18) | 19)   | 20)  | 21) | 22) | 23)   | 24)  | 25) | 26)  | 27)  | 28) |
| Hyp0057  | 20.35     | 9.94  | 0  | 0.041 | n/a   | 2.5  | 4.99  | 1.67 | 0  | 0.076 | n/a   | 6   | 4   | 4   | 1   | n/a  | 2   | 3   | 9.68  | 3.63 | 1   | 1   | 4.58  | 1.87 | 6   | n/a  | n/a  | n/a |
| Hyp0058  | 19.57     | 9.07  | 0  | 0.038 | n/a   | 3    | 6.35  | 2.00 | 0  | 0.125 | n/a   | 4   | 4   | 4   | 1   | 27.5 | 2   | 4   | 10.09 | 3.94 | 1   | 2   | 3.60  | 1.41 | 6   | n/a  | n/a  | n/a |
| Hyp0059  | 28.52     | 14.23 | 0  | 0.015 | n/a   | 1    | 14.93 | 6.72 | 0  | 0.022 | n/a   | 1   | 4   | 4   | 1   | 29.0 | 2   | 4   | 7.47  | 3.85 | 1   | 1   | 3.50  | 1.49 | 5   | n/a  | n/a  | n/a |
| Hyp0075  | 14.70     | 7.81  | 0  | 0.021 | n/a   | 10.5 | 10.11 | 3.81 | 0  | 0.050 | 0.190 | 13  | 2   | 2   | 1   | 59.0 | 2   | 4   | 11.74 | 5.03 | 2   | 3   | 4.67  | 1.36 | 2   | 5.41 | 3.40 | 1   |
| Hyp0076  | 21.51     | 9.25  | 0  | 0.026 | 0.063 | 7.5  | 13.20 | 4.28 | 0  | 0.023 | 0.101 | 7   | 2   | 2   | 1   | 53.7 | 2   | 2   | 12.86 | 5.37 | 2   | 1   | 4.37  | 1.24 | 2   | 5.26 | 3.45 | 1   |
| Hyp0077  | 27.80     | 11.19 | 0  | 0.011 | 0.044 | 7    | 19.08 | 6.51 | 0  | 0.023 | 0.095 | 8   | 2   | 2   | 1   | 51.5 | 2   | 2   | 13.82 | 5.92 | 2   | 3   | 5.14  | 1.60 | 1   | 6.24 | 4.09 | 1   |
| Hyp0078  | 22.19     | 8.31  | 0  | 0.014 | n/a   | 6    | 11.28 | 3.47 | 0  | 0.024 | 0.089 | 3   | 2   | 2   | 1   | 58.5 | 3   | 2   | 13.46 | 5.69 | 2   | 2   | 5.73  | 1.28 | 2   | n/a  | n/a  | n/a |
| Hyp0082  | 19.92     | 7.74  | 1  | 0     | n/a   | 0    | 11.04 | 3.71 | 1  | 0     | n/a   | 0   | 4   | 4   | 1   | 43.7 | 2   | 2   | 8.42  | 4.13 | 1   | 2   | 4.25  | 1.71 | 6   | 7.57 | 4.64 | 4   |
| Hyp0083  | 24.10     | 10.66 | 1  | 0     | n/a   | 0    | 14.81 | 6.27 | 1  | 0     | n/a   | 0   | 4   | 4   | 1   | 31.0 | 2   | 3   | 9.59  | 4.21 | 1   | 2   | 4.89  | 2.11 | 6   | 6.74 | 3.81 | 4   |
| Hyp0084  | 18.01     | 8.48  | 1  | 0     | n/a   | 0    | 12.77 | 5.46 | 1  | 0     | n/a   | 0   | 4   | 4   | 1   | 50.5 | 2   | 2   | 7.50  | 3.98 | 2   | 2   | 4.41  | 1.57 | 6   | 7.22 | 4.30 | 4   |
| Hyp0102  | 18.63     | 7.08  | 1  | 0     | 0.023 | 8.5  | 16.35 | 4.29 | 1  | 0     | 0.023 | 9   | 2   | 2   | 1   | 51.3 | 2   | 1   | 14.52 | 5.76 | 2   | 1   | 8.12  | 1.07 | 2   | n/a  | n/a  | n/a |
| Hyp0103  | 14.29     | 4.13  | 1  | 0     | 0.026 | 14.5 | 12.23 | 3.37 | 1  | 0     | 0.015 | 10  | n/a | 2   | 1   | 52.0 | 2   | 1   | 13.87 | 4.91 | 2   | 3   | 7.25  | 0.98 | 2   | n/a  | n/a  | n/a |
| Hyp0104  | 10.73     | 3.09  | 1  | 0     | 0.025 | 13   | 12.35 | 3.20 | 1  | 0     | 0.016 | 7   | 2   | 2   | 1   | 49.0 | 2   | 1   | 13.82 | 4.55 | 2   | 3   | 7.26  | 1.08 | 2   | n/a  | n/a  | n/a |
| Hyp0105  | 14.86     | 4.27  | 1  | 0     | 0.012 | 13.5 | 12.52 | 3.25 | 1  | 0     | 0.023 | 13  | n/a | 2   | 1   | 50.5 | 2   | 1   | 14.00 | 4.62 | 2   | 3   | 7.45  | 1.06 | 2   | n/a  | n/a  | n/a |
| Hyp0106  | 16.92     | 5.25  | 1  | 0     | 0.021 | 9    | 13.36 | 3.26 | 1  | 0     | 0.044 | 10  | n/a | 2   | 1   | 55.0 | 2   | 1   | 13.28 | 4.74 | 2   | 3   | 7.53  | 1.00 | 2   | n/a  | n/a  | n/a |
| Hyp0108  | 31.64     | 9.54  | 0  | 0.025 | 0.039 | 6.5  | 20.26 | 4.55 | 0  | 0.021 | 0.104 | 4   | 2   | 2   | 1   | n/a  | 2   | 4   | 11.16 | 4.13 | 1   | 1   | 10.25 | 2.29 | 3   | n/a  | n/a  | n/a |
| Hyp0112  | 30.67     | 9.05  | 0  | 0.013 | 0.035 | 4    | 19.69 | 4.63 | 0  | 0.024 | 0.098 | 4   | 2   | 2   | 1   | n/a  | 2   | 4   | 11.14 | 5.39 | 1   | 3   | 11.44 | 2.66 | 3   | 6.59 | 4.15 | 1   |
| Hyp0114  | 13.60     | 4.52  | 0  | 0.010 | 0.088 | 10   | 11.45 | 3.55 | 0  | 0.016 | 0.149 | 12  | 2   | 2   | 1   | 51.8 | 2   | 4   | 11.78 | 3.62 | 2   | 1   | 4.57  | 1.15 | 2   | 5.91 | 3.51 | 1   |
| Hyp0115  | 13.68     | 4.71  | 0  | 0.003 | 0.075 | 4    | 11.99 | 3.47 | 1  | 0     | 0.061 | 4   | 2   | 2   | 1   | 53.2 | 2   | 4   | 13.32 | 4.68 | 2   | 1   | 5.62  | 1.02 | 1   | 6.05 | 3.63 | 1   |
| Hyp0116  | 14.18     | 3.99  | 1  | 0     | 0.050 | 6.5  | 10.55 | 2.91 | 1  | 0     | 0.041 | 6   | 2   | 2   | 1   | n/a  | 2   | 1   | 10.97 | 3.29 | 2   | 1   | 4.17  | 0.95 | 1   | 5.70 | 3.34 | 1   |
| Hyp0119  | 11.94     | 4.60  | 0  | 0.008 | 0.117 | 6.5  | 10.38 | 3.15 | 0  | 0.039 | 0.165 | 8   | 2   | 2   | 1   | 50.5 | 2   | 1   | 11.19 | 3.30 | 2   | 1   | 4.47  | 0.82 | 1   | 5.45 | 3.41 | 3   |
| Hyp0120  | 12.96     | 4.22  | 0  | 0.018 | 0.088 | 10.5 | 6.79  | 1.94 | 0  | 0.024 | 0.048 | 17  | 2   | 2   | 1   | 59.0 | 2   | 1   | 10.92 | 4.60 | 2   | 1   | 4.07  | 0.92 | 1   | 6.81 | 3.90 | 3   |
| Hyp0136  | 23.30     | 11.52 | 0  | 0.008 | 0.048 | 4    | 14.28 | 5.66 | 0  | 0.016 | 0.087 | 4   | 2   | 2   | 1   | 47.4 | 2   | 1   | 15.22 | 7.25 | 2   | 1   | 6.56  | 1.42 | 2   | 6.31 | 4.54 | 1   |
| Hyp0138  | 21.00     | 11.32 | 0  | 0.009 | 0.060 | 6.5  | 11.60 | 4.29 | 0  | 0.006 | 0.109 | 5   | 2   | 2   | 1   | 47.4 | 3   | 2   | 13.66 | 6.06 | 1   | 2   | 5.60  | 2.43 | 6   | 6.64 | 5.14 | 4   |
| Hyp0147  | 26.37     | 12.16 | 0  | 0.006 | 0.045 | 4    | 15.66 | 5.06 | 0  | 0.012 | 0.096 | 5   | 2   | 2   | 1   | 54.8 | 2   | 2   | 15.87 | 8.02 | 2   | 1   | 6.43  | 1.30 | 2   | 6.16 | 4.50 | 1   |
| Hyp0150  | 24.21     | 10.53 | 0  | 0.010 | 0.052 | 3.5  | 13.75 | 5.27 | 0  | 0.013 | 0.097 | 5   | 2   | 2   | 1   | 49.5 | 2   | 2   | 15.49 | 6.64 | 1   | 1   | 6.28  | 1.42 | 1   | 6.62 | 4.26 | 1   |
| Hyp0152  | 27.57     | 12.69 | 1  | 0     | 0.032 | 2    | 16.93 | 5.11 | 0  | 0.007 | 0.081 | 2   | 2   | 2   | 1   | 49.2 | 2   | 1   | 14.40 | 8.37 | 2   | 1   | 6.30  | 1.44 | 1   | 6.92 | 4.20 | 1   |
| Hyp0153  | 18.56     | 11.47 | 1  | 0     | n/a   | 1    | 6.05  | 2.77 | 0  | 0.019 | n/a   | 1   | 4   | 4   | 1   | 32.0 | 2   | 3   | 8.97  | 5.31 | 1   | 1   | 4.11  | 2.15 | 6   | 6.41 | 3.87 | 4   |
| Hyp0154  | 26.75     | 9.90  | 1  | 0     | n/a   | 7.5  | 11.18 | 3.91 | 0  | 0.007 | n/a   | 5   | 2   | 2   | 1   | 44.8 | 2   | 4   | 14.53 | 5.91 | 2   | 3   | 6.65  | 1.25 | 2   | 5.96 | 3.97 | 1   |
| Hyp0156  | 16.36     | 9.15  | 0  | 0.002 | n/a   | 1.5  | 6.60  | 2.74 | 0  | 0.018 | n/a   | 1   | 4   | 4   | 1   | 29.2 | 2   | 3   | 8.57  | 5.50 | 1   | 1   | 4.22  | 2.20 | 6   | 6.27 | 3.60 | 4   |
| Hyp0157  | 19.98     | 5.20  | 0  | 0.003 | 0.040 | 5    | 13.56 | 3.53 | 1  | 0     | 0.053 | 1   | 2   | 2   | 1   | 50.0 | 2   | 1   | 14.29 | 6.41 | 2   | 3   | 5.53  | 0.81 | 2   | 5.56 | 3.66 | 3   |
| Hyp0158  | 18.37     | 10.58 | 0  | 0.007 | n/a   | 2    | 9.25  | 3.55 | 1  | 0     | n/a   | 1   | 4   | 4   | 1   | 27.2 | 2   | 3   | 11.25 | 5.74 | 1   | 2   | 5.12  | 1.81 | 5   | 5.47 | 3.35 | 4   |

|         |       |       |   |       |       |      |       |      |   |       |       |    |     |   |   |      |   |   |       |      |   |   |      |      |   |      |      |     |
|---------|-------|-------|---|-------|-------|------|-------|------|---|-------|-------|----|-----|---|---|------|---|---|-------|------|---|---|------|------|---|------|------|-----|
| Hyp0159 | 21.65 | 10.21 | 0 | 0.005 | 0.031 | 5    | 13.53 | 4.57 | 1 | 0     | 0.021 | 3  | 2   | 2 | 1 | 49.4 | 2 | 1 | 14.42 | 7.08 | 2 | 3 | 6.85 | 1.29 | 2 | 6.84 | 4.00 | 3   |
| Hyp0160 | 25.59 | 11.48 | 0 | 0.003 | 0.055 | 2    | 17.16 | 5.63 | 0 | 0.003 | 0.086 | 2  | 2   | 2 | 1 | 49.8 | 2 | 2 | 13.44 | 5.87 | 1 | 1 | 5.86 | 1.41 | 1 | 6.74 | 4.81 | 1   |
| Hyp0163 | 20.62 | 9.99  | 1 | 0     | n/a   | 0    | 10.01 | 3.52 | 1 | 0     | n/a   | 0  | 4   | 4 | 1 | 31.0 | 2 | 3 | 10.93 | 5.25 | 1 | 1 | 4.74 | 1.55 | 6 | 6.71 | 4.75 | 4   |
| Hyp0165 | 19.00 | 9.72  | 1 | 0     | n/a   | 0    | 11.26 | 4.94 | 0 | 0.006 | n/a   | 0  | 4   | 4 | 1 | 46.3 | 2 | 2 | 8.15  | 4.83 | 1 | 1 | 3.57 | 1.54 | 6 | n/a  | n/a  | n/a |
| Hyp0168 | 23.46 | 11.50 | 1 | 0     | n/a   | 2.5  | 18.37 | 7.65 | 0 | 0.014 | n/a   | 4  | 4   | 4 | 1 | 29.3 | 2 | 2 | 12.91 | 6.68 | 2 | 1 | 4.73 | 2.00 | 6 | 5.78 | 4.18 | 4   |
| Hyp0169 | 18.77 | 11.28 | 1 | 0     | n/a   | 0    | 7.75  | 3.43 | 1 | 0     | n/a   | 0  | 4   | 4 | 1 | 27.8 | 2 | 2 | 10.36 | 5.42 | 1 | 1 | 4.69 | 2.43 | 6 | 6.56 | 3.88 | 4   |
| Hyp0173 | 22.99 | 6.56  | 1 | 0     | 0.034 | 10.5 | 18.23 | 3.43 | 0 | 0.010 | 0.102 | 11 | 2   | 2 | 1 | 46.6 | 2 | 1 | 12.08 | 5.48 | 2 | 1 | 5.17 | 0.91 | 1 | 6.83 | 3.17 | 2   |
| Hyp0178 | 16.57 | 9.96  | 1 | 0     | n/a   | 0    | 10.05 | 4.24 | 1 | 0     | n/a   | 0  | 4   | 4 | 1 | 43.5 | 2 | 2 | 11.32 | 5.29 | 1 | 2 | 4.39 | 1.83 | 6 | 6.37 | 3.77 | 4   |
| Hyp0179 | 18.51 | 7.71  | 0 | 0.005 | n/a   | 5    | 10.46 | 2.88 | 0 | 0.011 | n/a   | 4  | 2   | 2 | 1 | 65.2 | 2 | 3 | 15.06 | 6.97 | 2 | 1 | 7.00 | 1.34 | 2 | 4.71 | 3.75 | 1   |
| Hyp0181 | 22.62 | 8.85  | 0 | 0.015 | 0.051 | 8.5  | 18.08 | 5.89 | 0 | 0.012 | 0.069 | 9  | 2   | 2 | 1 | 29.5 | 2 | 1 | 14.14 | 6.79 | 2 | 1 | 5.05 | 1.32 | 1 | 6.49 | 3.57 | 3   |
| Hyp0184 | 15.42 | 8.08  | 1 | 0     | n/a   | 0    | 7.16  | 2.86 | 1 | 0     | n/a   | 0  | 4   | 4 | 1 | 26.8 | 2 | 3 | 11.06 | 5.71 | 1 | 1 | 4.30 | 1.58 | 6 | 5.60 | 3.62 | 4   |
| Hyp0185 | 19.23 | 4.70  | 0 | 0.014 | n/a   | 14.5 | 14.49 | 3.12 | 0 | 0.042 | n/a   | 6  | 2   | 2 | 1 | 51.8 | 2 | 1 | 12.28 | 5.88 | 2 | 3 | 6.06 | 0.85 | 2 | 6.99 | 2.90 | 2   |
| Hyp0186 | 15.54 | 7.35  | 1 | 0     | n/a   | 0    | 4.76  | 1.96 | 1 | 0     | n/a   | 0  | 4   | 4 | 0 | 31.2 | 2 | 3 | 9.37  | 4.43 | 1 | 1 | 4.66 | 1.71 | 6 | 5.56 | 3.70 | 4   |
| Hyp0187 | 26.84 | 9.79  | 0 | 0.013 | 0.061 | 9.5  | 17.16 | 4.68 | 0 | 0.032 | 0.127 | 18 | 2   | 2 | 1 | 31.4 | 2 | 1 | 11.85 | 6.04 | 2 | 1 | 4.72 | 0.85 | 2 | 8.40 | 3.54 | 2   |
| Hyp0193 | 18.38 | 9.08  | 0 | 0.004 | 0.112 | 1    | 9.50  | 3.30 | 1 | 0     | 0.223 | 0  | 4   | 4 | 1 | 48.0 | 3 | 3 | 12.14 | 5.12 | 1 | 1 | 4.47 | 1.93 | 6 | 6.97 | 3.35 | 4   |
| Hyp0198 | 21.08 | 6.47  | 0 | 0.023 | n/a   | 4    | 13.09 | 2.82 | 0 | 0.060 | n/a   | 7  | 2   | 2 | 1 | 35.0 | 2 | 2 | 13.42 | 6.02 | 2 | 2 | 6.87 | 0.87 | 2 | 6.73 | 3.57 | 3   |
| Hyp0200 | 11.51 | 7.11  | 0 | 0.052 | n/a   | 5    | 5.94  | 2.58 | 0 | 0.104 | n/a   | 2  | 4   | 4 | 1 | 28.3 | 2 | 2 | 8.94  | 5.50 | 1 | 2 | 3.52 | 1.37 | 6 | 6.29 | 3.67 | 4   |
| Hyp0201 | 19.54 | 10.64 | 0 | 0.011 | n/a   | 2    | 10.44 | 3.94 | 0 | 0.023 | n/a   | 2  | 4   | 4 | 1 | 31.0 | 2 | 2 | 9.03  | 4.94 | 1 | 2 | 4.43 | 1.91 | 6 | 6.43 | 3.76 | 4   |
| Hyp0203 | 24.04 | 11.35 | 0 | 0.013 | 0.059 | 4    | 15.11 | 5.44 | 0 | 0.015 | 0.112 | 6  | 2   | 2 | 1 | 52.6 | 2 | 2 | 15.95 | 7.38 | 2 | 2 | 6.40 | 1.37 | 1 | 6.78 | 4.32 | 1   |
| Hyp0204 | 16.12 | 4.20  | 0 | 0.002 | 0.080 | 11.5 | 11.58 | 2.50 | 1 | 0     | 0.132 | 11 | 2   | 2 | 1 | 49.3 | 2 | 1 | 11.52 | 4.47 | 2 | 1 | 5.05 | 0.92 | 2 | 7.95 | 3.58 | 3   |
| Hyp0212 | 19.34 | 7.24  | 0 | 0.001 | 0.045 | 0.5  | 13.85 | 4.17 | 1 | 0     | 0.099 | 1  | 2   | 2 | 1 | 50.6 | 2 | 1 | 15.49 | 7.24 | 2 | 3 | 6.76 | 1.07 | 2 | 8.26 | 4.03 | 3   |
| Hyp0213 | 18.55 | 5.12  | 1 | 0     | 0.057 | 11   | 13.01 | 2.10 | 1 | 0     | 0.186 | 3  | 2   | 2 | 1 | n/a  | 2 | 1 | 13.12 | 6.64 | 2 | 1 | 6.25 | 1.12 | 2 | 8.37 | 4.20 | 3   |
| Hyp0214 | 22.58 | 6.50  | 0 | 0.045 | 0.139 | 4.5  | 20.10 | 4.54 | 0 | 0.049 | 0.171 | 3  | 2   | 2 | 1 | 54.4 | 2 | 2 | 11.96 | 5.73 | 1 | 2 | 6.39 | 1.23 | 1 | 4.88 | 2.85 | 1   |
| Hyp0215 | 19.92 | 6.78  | 0 | 0.013 | 0.086 | 7.5  | 12.53 | 3.33 | 0 | 0.023 | 0.137 | 14 | 2   | 2 | 1 | 36.5 | 2 | 1 | 11.80 | 4.99 | 2 | 3 | 4.28 | 1.02 | 1 | 6.19 | 2.81 | 3   |
| Hyp0216 | 22.29 | 14.33 | 0 | 0.011 | 0.067 | 6    | 12.83 | 6.03 | 0 | 0.012 | 0.123 | 4  | 2   | 2 | 1 | 41.5 | 3 | 2 | 11.84 | 5.71 | 1 | 2 | 4.28 | 2.69 | 5 | 8.46 | 4.67 | 4   |
| Hyp0217 | 18.13 | 11.23 | 1 | 0     | 0.057 | 0.5  | 5.32  | 2.21 | 1 | 0     | 0.487 | 0  | 4   | 4 | 1 | n/a  | 3 | 2 | 10.90 | 5.57 | 1 | 2 | 4.61 | 1.88 | 5 | 5.55 | 3.78 | 4   |
| Hyp0220 | 23.73 | 10.93 | 1 | 0     | n/a   | 0    | 7.83  | 2.34 | 1 | 0     | n/a   | 0  | 4   | 4 | 1 | 26.0 | 2 | 2 | 9.18  | 5.56 | 1 | 2 | 4.89 | 2.23 | 6 | 6.18 | 4.25 | 4   |
| Hyp0221 | 19.11 | 10.05 | 0 | 0.013 | n/a   | 1.5  | 8.53  | 4.01 | 0 | 0.028 | n/a   | 2  | 4   | 4 | 1 | 53.7 | 2 | 2 | 10.95 | 6.15 | 1 | 2 | 5.19 | 2.14 | 6 | 6.07 | 3.69 | 4   |
| Hyp0222 | 16.94 | 10.25 | 1 | 0     | n/a   | 0    | 8.91  | 4.72 | 1 | 0     | n/a   | 0  | 4   | 4 | 1 | 47.0 | 2 | 2 | 8.52  | 4.14 | 1 | 2 | 4.47 | 2.07 | 6 | 5.81 | 3.51 | 4   |
| Hyp0228 | 25.26 | 12.33 | 1 | 0     | 0.040 | 0    | 12.20 | 4.22 | 0 | 0.006 | 0.204 | 0  | 4   | 4 | 1 | 55.5 | 2 | 2 | 13.38 | 6.03 | 1 | 1 | 5.63 | 2.05 | 5 | 6.25 | 4.32 | 4   |
| Hyp0231 | 24.71 | 11.82 | 0 | 0.002 | 0.072 | 1    | 11.45 | 3.55 | 1 | 0     | 0.211 | 0  | 4   | 4 | 1 | 47.3 | 2 | 2 | 14.58 | 7.21 | 1 | 2 | 5.63 | 2.36 | 6 | 6.12 | 4.07 | 4   |
| Hyp0233 | 22.95 | 12.48 | 0 | 0.005 | 0.052 | 1    | 12.64 | 4.87 | 0 | 0.010 | 0.129 | 1  | 4   | 4 | 1 | n/a  | 2 | 2 | 13.66 | 7.35 | 1 | 2 | 4.35 | 2.17 | 5 | 6.53 | 4.22 | 4   |
| Hyp0236 | 18.53 | 9.47  | 0 | 0.012 | 0.080 | 1    | 12.29 | 5.56 | 0 | 0.014 | 0.112 | 1  | 2   | 2 | 1 | 60.5 | 2 | 1 | 17.43 | 6.18 | 2 | 2 | 6.16 | 1.78 | 1 | 7.11 | 4.32 | 1   |
| Hyp0240 | 26.01 | 12.07 | 1 | 0     | 0.063 | 0    | 14.69 | 5.50 | 1 | 0     | 0.095 | 0  | 4   | 4 | 1 | 53.3 | 2 | 2 | 15.75 | 6.81 | 1 | 2 | 6.01 | 1.93 | 6 | 4.50 | 3.47 | 4   |
| Hyp0244 | 32.75 | 13.04 | 0 | 0.004 | 0.031 | 2.5  | 16.21 | 4.63 | 0 | 0.004 | 0.038 | 3  | 2   | 2 | 1 | 46.3 | 2 | 1 | 14.18 | 6.81 | 2 | 3 | 7.15 | 1.58 | 2 | 6.16 | 4.20 | 1   |
| Hyp0255 | 14.94 | 8.02  | 1 | 0.008 | n/a   | 1    | 4.27  | 2.00 | 1 | 0     | n/a   | 0  | 4   | 4 | 1 | 46.5 | 2 | 3 | 10.09 | 5.90 | 1 | 1 | 4.76 | 2.36 | 6 | 6.53 | 4.30 | 4   |
| Hyp0257 | 24.57 | 10.20 | 1 | 0     | 0.056 | 0    | 14.44 | 4.48 | 1 | 0     | 0.123 | 0  | 4   | 4 | 1 | 50.4 | 2 | 3 | 34.18 | 5.00 | 1 | 2 | 5.95 | 1.90 | 6 | 6.41 | 4.23 | 4   |
| Hyp0258 | 21.31 | 9.09  | 1 | 0     | 0.065 | 0    | 11.23 | 4.58 | 1 | 0     | 0.161 | 0  | 4   | 4 | 1 | 55.3 | 2 | 3 | 13.44 | 5.49 | 1 | 2 | 4.56 | 1.42 | 5 | 4.88 | 3.42 | 4   |
| Hyp0261 | 23.53 | 11.37 | 1 | 0     | 0.078 | 0    | 9.71  | 3.16 | 1 | 0     | 0.218 | 0  | n/a | 4 | 1 | 41.0 | 2 | 3 | 12.90 | 6.41 | 1 | 2 | 4.97 | 2.19 | 6 | 5.93 | 3.12 | 4   |
| Hyp0262 | 8.28  | 4.72  | 1 | 0     | 0.070 | 6    | 5.28  | 2.44 | 1 | 0     | 0.049 | 11 | 2   | 2 | 1 | n/a  | 2 | 1 | 12.09 | 4.85 | 2 | 1 | 4.22 | 0.98 | 1 | 5.99 | 3.42 | 1   |
| Hyp0263 | 19.53 | 8.86  | 0 | 0.025 | n/a   | 1    | 6.89  | 2.76 | 0 | 0.084 | n/a   | 1  | 4   | 4 | 1 | 29.6 | 2 | 3 | 11.61 | 6.39 | 1 | 2 | 5.04 | 1.93 | 6 | 7.16 | 4.78 | 4   |
| Hyp0265 | 21.02 | 13.33 | 0 | 0.005 | n/a   | 1    | 8.41  | 4.05 | 0 | 0.028 | n/a   | 1  | 4   | 4 | 1 | n/a  | 2 | 2 | 10.21 | 5.86 | 1 | 2 | 4.39 | 2.73 | 5 | 5.73 | 3.65 | 4   |
| Hyp0267 | 18.82 | 9.35  | 0 | 0.007 | n/a   | 0.5  | 7.35  | 2.51 | 1 | 0     | n/a   | 0  | 4   | 4 | 1 | 48.2 | 2 | 3 | 10.61 | 5.23 | 1 | 2 | 6.11 | 2.54 | 6 | 6.89 | 4.04 | 4   |
| Hyp0269 | 27.28 | 11.48 | 1 | 0     | 0.041 | 2.5  | 13.89 | 4.42 | 1 | 0     | 0.135 | 7  | 2   | 2 | 1 | 46.0 | 2 | 1 | 13.11 | 6.45 | 2 | 1 | 5.91 | 1.41 | 2 | 7.33 | 4.32 | 1   |
| Hyp0271 | 16.95 | 6.64  | 1 | 0     | 0.015 | 2.5  | 11.47 | 3.28 | 1 | 0     | 0.017 | 2  | 2   | 2 | 1 | 51.8 | 2 | 1 | 15.30 | 6.84 | 2 | 3 | 6.52 | 1.43 | 1 | 3.68 | 2.53 | 1   |
| Hyp0275 | 16.68 | 9.28  | 1 | 0     | n/a   | 0    | 6.45  | 1.74 | 1 | 0     | n/a   | 0  | 4   | 4 | 1 | 29.4 | 2 | 3 | 9.38  | 4.92 | 1 | 2 | 4.45 | 2.06 | 6 | 6.55 | 3.65 | 4   |

|         |       |       |   |       |       |      |       |      |   |       |       |    |   |   |   |      |   |   |       |      |   |   |      |      |   |      |      |     |
|---------|-------|-------|---|-------|-------|------|-------|------|---|-------|-------|----|---|---|---|------|---|---|-------|------|---|---|------|------|---|------|------|-----|
| Hyp0277 | 9.80  | 6.07  | 1 | 0     | n/a   | 0    | 3.84  | 1.67 | 1 | 0     | n/a   | 0  | 4 | 4 | 1 | 29.4 | 3 | 2 | 11.47 | 5.79 | 1 | 2 | 5.07 | 2.04 | 6 | 6.56 | 3.85 | 4   |
| Hyp0278 | 19.53 | 9.10  | 0 | 0.013 | 0.076 | 4    | 12.22 | 5.09 | 0 | 0.010 | 0.194 | 1  | 4 | 4 | 1 | n/a  | 2 | 3 | 12.78 | 5.49 | 1 | 1 | 4.17 | 1.94 | 6 | 7.41 | 3.30 | 4   |
| Hyp0283 | 16.41 | 6.43  | 0 | 0.001 | n/a   | 0    | 5.46  | 2.10 | 0 | 0.028 | n/a   | 1  | 4 | 4 | 1 | 31.4 | 2 | 2 | 7.84  | 4.44 | 2 | 2 | 4.37 | 2.10 | 6 | 6.92 | 3.28 | 4   |
| Hyp0289 | 15.76 | 8.09  | 1 | 0     | n/a   | 0    | 8.88  | 3.18 | 1 | 0     | n/a   | 0  | 4 | 4 | 1 | 36.0 | 2 | 2 | 11.66 | 6.40 | 2 | 2 | 4.70 | 2.01 | 6 | 6.26 | 3.71 | 4   |
| Hyp0344 | 37.49 | 19.07 | 0 | 0.013 | 0.040 | 3.5  | 16.35 | 6.11 | 0 | 0.010 | 0.089 | 1  | 4 | 2 | 1 | 47.0 | 2 | 2 | 11.91 | 5.80 | 1 | 1 | 5.79 | 2.19 | 6 | n/a  | n/a  | n/a |
| Hyp0345 | 29.18 | 15.01 | 0 | 0.007 | n/a   | 4.5  | 12.62 | 5.59 | 0 | 0.009 | n/a   | 4  | 4 | 4 | 1 | 53.0 | 2 | 2 | 5.37  | 3.58 | 1 | 2 | 5.01 | 2.05 | 6 | n/a  | n/a  | n/a |
| Hyp0352 | 31.28 | 13.86 | 1 | 0     | n/a   | 0    | 16.75 | 5.53 | 1 | 0     | n/a   | 0  | 4 | 4 | 1 | 47.4 | 2 | 3 | 11.13 | 7.25 | 1 | 2 | 5.03 | 1.90 | 6 | n/a  | n/a  | n/a |
| Hyp0354 | 21.95 | 15.09 | 1 | 0     | n/a   | 0    | 11.61 | 5.17 | 1 | 0     | n/a   | 0  | 4 | 4 | 1 | 48.5 | 2 | 3 | 10.98 | 5.94 | 1 | 1 | 4.44 | 2.10 | 6 | n/a  | n/a  | n/a |
| Hyp0363 | 19.20 | 7.61  | 0 | 0.009 | 0.068 | 8.5  | 10.99 | 3.05 | 0 | 0.009 | 0.133 | 13 | 2 | 2 | 1 | 45.0 | 3 | 2 | 10.17 | 4.77 | 1 | 2 | 5.96 | 1.32 | 4 | n/a  | n/a  | n/a |
| Hyp0364 | 23.11 | 8.66  | 0 | 0.011 | 0.042 | 10.5 | 12.26 | 4.87 | 0 | 0.016 | 0.101 | 7  | 2 | 2 | 1 | 57.5 | 3 | 2 | 11.79 | 5.96 | 2 | 2 | 6.86 | 0.96 | 2 | n/a  | n/a  | n/a |
| Hyp0378 | 18.50 | 7.73  | 1 | 0     | 0.040 | 2    | 14.64 | 3.66 | 0 | 0.006 | 0.137 | 5  | 2 | 2 | 1 | 43.3 | 3 | 1 | 11.38 | 5.63 | 2 | 1 | 3.85 | 0.83 | 2 | 6.98 | 3.11 | 1   |
| Hyp0381 | 22.02 | 10.51 | 0 | 0.008 | 0.035 | 3.5  | 14.17 | 5.59 | 0 | 0.004 | 0.092 | 7  | 2 | 2 | 1 | 49.0 | 2 | 2 | 13.31 | 6.31 | 2 | 1 | 6.13 | 1.53 | 2 | n/a  | n/a  | n/a |
| Hyp0382 | 17.98 | 7.24  | 0 | 0.002 | 0.035 | 5    | 10.69 | 3.98 | 1 | 0     | 0.052 | 3  | 2 | 2 | 1 | 45.0 | 2 | 2 | 14.62 | 6.08 | 2 | 1 | 5.51 | 1.59 | 4 | n/a  | n/a  | n/a |
| Hyp0383 | 22.00 | 9.38  | 0 | 0.007 | 0.030 | 3.5  | 14.83 | 5.59 | 0 | 0.008 | 0.050 | 5  | 2 | 2 | 1 | 50.5 | 2 | 2 | 12.09 | 5.87 | 2 | 1 | 5.54 | 1.67 | 4 | n/a  | n/a  | n/a |
| Hyp0385 | 17.92 | 4.90  | 0 | 0.002 | 0.055 | 8.5  | 13.68 | 3.54 | 1 | 0     | 0.158 | 11 | 2 | 2 | 1 | n/a  | 2 | 1 | 12.82 | 5.63 | 2 | 1 | 4.65 | 0.90 | 2 | n/a  | n/a  | n/a |
| Hyp0386 | 19.20 | 8.01  | 1 | 0     | 0.026 | 5.5  | 11.10 | 4.47 | 1 | 0     | 0.038 | 8  | 2 | 2 | 1 | n/a  | 2 | 1 | 11.30 | 5.81 | 2 | 3 | 5.18 | 1.04 | 2 | n/a  | n/a  | n/a |
| Hyp0388 | 19.08 | 9.71  | 1 | 0     | n/a   | 0    | 9.23  | 3.66 | 1 | 0     | n/a   | 0  | 4 | 4 | 1 | 28.5 | 2 | 3 | 10.99 | 5.52 | 1 | 2 | 4.41 | 1.87 | 6 | n/a  | n/a  | n/a |
| Hyp0389 | 20.42 | 10.07 | 0 | 0.003 | n/a   | 0    | 10.19 | 3.07 | 1 | 0     | n/a   | 0  | 4 | 4 | 1 | 36.5 | 2 | 3 | 11.38 | 5.21 | 1 | 2 | 5.35 | 2.13 | 6 | n/a  | n/a  | n/a |
| Hyp0391 | 15.47 | 3.82  | 1 | 0     | 0.060 | 11   | 15.45 | 4.12 | 1 | 0     | 0.035 | 6  | 2 | 2 | 1 | 52.8 | 2 | 1 | 12.14 | 5.30 | 2 | 3 | 5.33 | 0.85 | 2 | n/a  | n/a  | n/a |
| Hyp0393 | 21.17 | 11.57 | 0 | 0.001 | n/a   | 3    | 8.00  | 4.09 | 1 | 0     | n/a   | 0  | 4 | 4 | 1 | 25.0 | 2 | 3 | 9.50  | 5.22 | 1 | 2 | 4.16 | 1.84 | 6 | n/a  | n/a  | n/a |
| Hyp0394 | 26.90 | 15.72 | 0 | 0.014 | n/a   | 2    | 18.02 | 7.11 | 0 | 0.040 | n/a   | 2  | 4 | 4 | 1 | 48.0 | 2 | 2 | 11.33 | 5.99 | 1 | 2 | 3.42 | 2.01 | 6 | 6.23 | 4.44 | 4   |
| Hyp0395 | 30.02 | 16.01 | 0 | 0.008 | n/a   | 1    | 14.28 | 4.78 | 1 | 0     | n/a   | 0  | 4 | 4 | 1 | 51.8 | 2 | 3 | 12.19 | 6.43 | 1 | 2 | 5.12 | 3.19 | 6 | n/a  | n/a  | n/a |
| Hyp0396 | 22.49 | 10.77 | 0 | 0.004 | n/a   | 2    | 11.17 | 3.61 | 0 | 0.024 | n/a   | 4  | 2 | 2 | 1 | 40.8 | 2 | 1 | 12.64 | 5.78 | 2 | 1 | 5.99 | 0.98 | 2 | n/a  | n/a  | n/a |
| Hyp0399 | 22.62 | 6.91  | 0 | 0.004 | 0.029 | 2.5  | 13.48 | 3.30 | 0 | 0.007 | 0.057 | 7  | 2 | 2 | 1 | 50.5 | 2 | 2 | 12.85 | 6.42 | 2 | 1 | 6.09 | 1.36 | 4 | 7.22 | 3.44 | 1   |
| Hyp0400 | 11.18 | 5.49  | 0 | 0.018 | 0.112 | 1.5  | 8.36  | 3.55 | 0 | 0.043 | 0.139 | 1  | 2 | 2 | 0 | 29.0 | 3 | 2 | 11.15 | 5.08 | 2 | 2 | 5.41 | 1.18 | 2 | n/a  | n/a  | n/a |
| Hyp0401 | 21.59 | 9.91  | 0 | 0.011 | 0.034 | 2    | 16.05 | 5.75 | 0 | 0.014 | 0.062 | 2  | 2 | 2 | 1 | 50.5 | 3 | 2 | 13.26 | 6.25 | 2 | 2 | 7.56 | 1.45 | 2 | n/a  | n/a  | n/a |
| Hyp0403 | 22.24 | 10.28 | 0 | 0.003 | 0.031 | 4    | 18.16 | 6.80 | 0 | 0.003 | 0.057 | 6  | 2 | 2 | 1 | 50.3 | 2 | 1 | 10.67 | 5.33 | 2 | 3 | 5.47 | 0.87 | 2 | n/a  | n/a  | n/a |
| Hyp0413 | 41.89 | 17.70 | 0 | 0.004 | n/a   | 0.5  | 17.81 | 4.51 | 0 | 0.012 | n/a   | 0  | 4 | 4 | 1 | 49.0 | 2 | 3 | 14.05 | 4.68 | 1 | 1 | 6.89 | 2.38 | 6 | n/a  | n/a  | n/a |
| Hyp0415 | 37.32 | 21.28 | 1 | 0     | n/a   | 0    | 20.79 | 6.58 | 1 | 0     | n/a   | 0  | 4 | 4 | 1 | 47.6 | 2 | 3 | 12.27 | 4.83 | 1 | 1 | 5.59 | 1.89 | 6 | n/a  | n/a  | n/a |
| Hyp0417 | 22.70 | 12.25 | 1 | 0     | n/a   | 0    | 9.45  | 3.13 | 1 | 0     | n/a   | 0  | 4 | 4 | 1 | 49.4 | 2 | 3 | 12.63 | 6.01 | 1 | 2 | 5.19 | 2.23 | 6 | n/a  | n/a  | n/a |
| Hyp0429 | 16.10 | 7.76  | 1 | 0     | n/a   | 0    | 7.82  | 2.36 | 1 | 0     | n/a   | 0  | 4 | 4 | 1 | 42.0 | 2 | 3 | 14.29 | 6.14 | 1 | 2 | 5.24 | 2.29 | 6 | n/a  | n/a  | n/a |
| Hyp0430 | 32.39 | 14.26 | 1 | 0     | n/a   | 0    | 13.04 | 4.83 | 1 | 0     | n/a   | 0  | 4 | 4 | 1 | 44.5 | 2 | 3 | 13.20 | 4.69 | 1 | 2 | 5.08 | 2.23 | 6 | n/a  | n/a  | n/a |
| Hyp0431 | 23.30 | 10.97 | 1 | 0     | n/a   | 0    | 10.47 | 2.49 | 1 | 0     | n/a   | 0  | 4 | 4 | 1 | 49.0 | 2 | 3 | 12.16 | 6.50 | 1 | 2 | 5.08 | 2.29 | 6 | n/a  | n/a  | n/a |
| Hyp0433 | 19.67 | 11.88 | 1 | 0     | 0.068 | 1    | 11.66 | 5.56 | 0 | 0.010 | 0.123 | 4  | 4 | 4 | 1 | n/a  | 2 | 2 | 8.74  | 3.52 | 1 | 3 | 3.87 | 2.05 | 5 | 5.41 | 3.63 | 4   |
| Hyp0434 | 17.72 | 11.56 | 0 | 0.037 | n/a   | 4    | 11.96 | 7.69 | 0 | 0.031 | n/a   | 4  | 4 | 4 | 1 | 44.2 | 2 | 2 | 10.65 | 5.76 | 1 | 2 | 4.27 | 2.48 | 6 | 4.78 | 3.27 | 4   |
| Hyp0435 | 20.87 | 13.98 | 1 | 0     | n/a   | 1    | 13.73 | 6.60 | 1 | 0     | n/a   | 0  | 2 | 4 | 1 | 45.5 | 2 | 2 | 7.68  | 4.78 | 1 | 1 | 4.54 | 2.07 | 6 | 7.71 | 4.67 | 1   |
| Hyp0493 | 16.73 | 7.33  | 0 | 0.003 | 0.068 | 6.5  | 11.79 | 4.41 | 1 | 0     | 0.037 | 4  | 2 | 2 | 1 | n/a  | 2 | 1 | 11.82 | 6.75 | 2 | 2 | 4.89 | 1.17 | 4 | 6.31 | 3.86 | 1   |
| Hyp0494 | 22.18 | 10.08 | 0 | 0.002 | 0.040 | 5.5  | 15.68 | 5.79 | 1 | 0     | 0.046 | 4  | 2 | 2 | 1 | n/a  | 2 | 1 | 11.56 | 7.01 | 2 | 1 | 5.00 | 1.43 | 4 | 6.35 | 3.63 | 1   |
| Hyp0495 | 22.93 | 10.33 | 0 | 0.002 | 0.043 | 8    | 10.82 | 3.05 | 1 | 0     | 0.154 | 9  | 2 | 2 | 1 | n/a  | 2 | 1 | 10.20 | 5.94 | 2 | 1 | 4.62 | 1.24 | 4 | 6.02 | 3.96 | 1   |
| Hyp0498 | 17.07 | 5.02  | 1 | 0     | 0.013 | 12   | 13.13 | 2.69 | 1 | 0     | 0.018 | 8  | 2 | 2 | 1 | 45.0 | 2 | 1 | 13.71 | 4.56 | 2 | 3 | 5.42 | 0.88 | 2 | 5.67 | 3.48 | 1   |
| Hyp0499 | 18.39 | 4.52  | 0 | 0.002 | 0.030 | 12   | 10.64 | 2.16 | 1 | 0     | 0.069 | 14 | 2 | 2 | 1 | 52.0 | 2 | 1 | 12.82 | 5.94 | 2 | 3 | 5.46 | 0.99 | 2 | 7.10 | 3.93 | 3   |
| Hyp0500 | 19.53 | 5.70  | 1 | 0     | 0.031 | 7    | 12.15 | 2.95 | 1 | 0     | 0.018 | 4  | 2 | 2 | 1 | 56.0 | 2 | 1 | 14.00 | 6.26 | 2 | 3 | 6.15 | 0.97 | 2 | 5.44 | 3.29 | 1   |
| Hyp0501 | 19.53 | 5.52  | 1 | 0     | 0.023 | 4    | 15.90 | 3.89 | 1 | 0     | 0.036 | 5  | 2 | 2 | 1 | 52.5 | 2 | 1 | 18.83 | 6.85 | 2 | 3 | 7.79 | 1.19 | 2 | n/a  | n/a  | n/a |
| Hyp0502 | 18.37 | 4.75  | 1 | 0     | 0.034 | 9    | 11.71 | 2.32 | 0 | 0.012 | 0.023 | 10 | 2 | 2 | 1 | 50.6 | 2 | 1 | 15.21 | 6.76 | 2 | 3 | 5.24 | 1.19 | 1 | 6.71 | 4.01 | 1   |
| Hyp0508 | 24.99 | 11.47 | 0 | 0.009 | 0.051 | 3.5  | 17.40 | 5.88 | 0 | 0.009 | 0.093 | 6  | 2 | 2 | 1 | 50.0 | 2 | 2 | 14.55 | 6.70 | 2 | 2 | 5.06 | 1.12 | 1 | 7.22 | 4.32 | 1   |
| Hyp0509 | 24.74 | 8.59  | 0 | 0.001 | 0.030 | 6    | 14.12 | 2.78 | 1 | 0     | 0.057 | 7  | 2 | 2 | 1 | 39.0 | 2 | 1 | 11.25 | 6.10 | 2 | 3 | 5.41 | 1.45 | 2 | 9.01 | 4.17 | 1   |

|         |       |       |   |       |       |      |       |      |   |       |       |    |   |   |   |      |   |   |       |      |   |   |      |      |   |      |      |     |
|---------|-------|-------|---|-------|-------|------|-------|------|---|-------|-------|----|---|---|---|------|---|---|-------|------|---|---|------|------|---|------|------|-----|
| Hyp0510 | 22.72 | 8.99  | 0 | 0.003 | 0.052 | 6    | 15.61 | 4.40 | 1 | 0     | 0.083 | 4  | 2 | 2 | 1 | 48.3 | 2 | 1 | 14.33 | 7.71 | 2 | 3 | 5.40 | 1.66 | 1 | 8.43 | 3.95 | 1   |
| Hyp0513 | 17.83 | 8.71  | 0 | 0.002 | 0.038 | 3.5  | 11.61 | 4.43 | 1 | 0     | 0.062 | 5  | 2 | 2 | 1 | 44.0 | 2 | 1 | 11.89 | 6.51 | 2 | 1 | 4.49 | 1.39 | 1 | 7.18 | 4.44 | 1   |
| Hyp0514 | 17.61 | 7.40  | 1 | 0     | 0.049 | 5.5  | 12.51 | 3.23 | 0 | 0.008 | 0.032 | 5  | 2 | 2 | 1 | n/a  | 2 | 1 | 11.02 | 5.03 | 2 | 1 | 4.51 | 1.43 | 3 | n/a  | n/a  | n/a |
| Hyp0515 | 20.84 | 10.05 | 1 | 0     | 0.049 | 2.5  | 13.50 | 4.05 | 1 | 0     | 0.093 | 4  | 2 | 2 | 1 | 52.0 | 2 | 1 | 14.54 | 7.98 | 2 | 1 | 5.59 | 1.49 | 1 | 7.54 | 4.18 | 1   |
| Hyp0528 | 19.14 | 8.95  | 0 | 0.001 | 0.023 | 5.5  | 11.39 | 3.36 | 1 | 0     | 0.042 | 3  | 2 | 2 | 1 | 44.3 | 2 | 1 | 13.73 | 6.32 | 2 | 3 | 5.20 | 1.10 | 2 | 6.11 | 3.89 | 1   |
| Hyp0529 | 22.46 | 7.57  | 0 | 0.003 | 0.026 | 8.5  | 12.59 | 3.48 | 1 | 0     | 0.029 | 5  | 2 | 2 | 1 | 39.0 | 2 | 1 | 12.52 | 5.91 | 2 | 3 | 4.65 | 1.00 | 2 | 5.52 | 3.55 | 1   |
| Hyp0530 | 21.14 | 8.84  | 0 | 0.006 | 0.038 | 5    | 15.02 | 4.76 | 1 | 0     | 0.058 | 5  | 2 | 2 | 1 | 46.0 | 2 | 1 | 12.85 | 6.12 | 2 | 2 | 5.16 | 1.70 | 4 | 7.02 | 4.80 | 1   |
| Hyp0533 | 19.71 | 7.26  | 0 | 0.007 | 0.039 | 10.5 | 13.82 | 3.93 | 1 | 0     | 0.041 | 5  | 2 | 2 | 1 | 54.5 | 2 | 2 | 13.92 | 5.89 | 2 | 1 | 6.51 | 1.20 | 1 | 7.93 | 4.35 | 1   |
| Hyp0534 | 19.14 | 7.46  | 0 | 0.006 | 0.048 | 6.5  | 11.10 | 3.27 | 1 | 0     | 0.079 | 5  | 2 | 2 | 1 | 49.7 | 2 | 2 | 14.20 | 8.34 | 2 | 1 | 6.35 | 1.78 | 2 | 8.17 | 4.73 | 1   |
| Hyp0535 | 18.63 | 7.76  | 0 | 0.008 | 0.058 | 6.5  | 10.93 | 3.54 | 0 | 0.016 | 0.074 | 3  | 2 | 4 | 1 | 45.0 | 2 | 2 | 11.63 | 5.90 | 2 | 1 | 5.54 | 1.34 | 2 | 7.43 | 4.70 | 1   |
| Hyp0600 | 14.51 | 8.30  | 0 | 0.007 | n/a   | 0.5  | 9.21  | 3.36 | 1 | 0     | n/a   | 1  | 4 | 4 | 1 | 29.3 | 2 | 2 | 9.07  | 5.53 | 1 | 2 | 4.26 | 2.31 | 6 | 6.12 | 4.97 | 4   |
| Hyp0601 | 15.88 | 7.61  | 1 | 0     | n/a   | 0    | 8.27  | 2.80 | 1 | 0     | n/a   | 0  | 4 | 4 | 1 | 31.5 | 2 | 2 | 8.75  | 5.64 | 1 | 2 | 4.40 | 1.99 | 6 | 6.83 | 4.00 | 4   |
| Hyp0604 | 21.58 | 9.98  | 0 | 0.006 | 0.046 | 4    | 11.75 | 4.03 | 0 | 0.013 | 0.114 | 4  | 2 | 2 | 1 | 50.4 | 2 | 2 | 15.82 | 7.57 | 2 | 2 | 6.11 | 1.34 | 4 | 6.54 | 4.22 | 1   |
| Hyp0605 | 22.11 | 9.05  | 0 | 0.002 | 0.041 | 3    | 13.91 | 4.20 | 1 | 0     | 0.076 | 4  | 2 | 2 | 1 | 47.6 | 2 | 2 | 15.85 | 6.75 | 2 | 3 | 6.18 | 1.25 | 4 | 5.68 | 3.60 | 1   |
| Hyp0646 | 22.27 | 8.59  | 0 | 0.006 | 0.056 | 7    | 14.02 | 4.33 | 0 | 0.016 | 0.105 | 6  | 2 | 2 | 1 | 53.6 | 2 | 2 | 16.55 | 7.76 | 2 | 2 | 6.33 | 1.42 | 4 | 5.89 | 4.13 | 1   |
| Hyp0651 | 28.56 | 9.55  | 0 | 0.012 | 0.060 | 6.5  | 19.54 | 6.43 | 0 | 0.015 | 0.096 | 9  | 2 | 2 | 1 | 47.5 | 2 | 1 | 15.23 | 7.39 | 2 | 1 | 6.49 | 1.14 | 2 | 7.77 | 2.95 | 2   |
| Hyp0652 | 14.75 | 3.17  | 0 | 0.010 | 0.083 | 4.5  | 10.10 | 1.72 | 0 | 0.018 | 0.220 | 4  | 2 | 2 | 1 | 35.0 | 2 | 1 | 11.99 | 5.94 | 2 | 1 | 6.07 | 1.09 | 2 | 7.28 | 3.26 | 2   |
| Hyp0657 | 20.30 | 10.52 | 1 | 0     | n/a   | 1    | 8.97  | 3.45 | 1 | 0     | n/a   | 1  | 4 | 4 | 1 | 45.8 | 2 | 3 | 10.40 | 5.17 | 1 | 1 | 4.60 | 1.89 | 6 | 5.55 | 3.83 | 4   |
| Hyp0658 | 15.49 | 9.42  | 1 | 0     | n/a   | 0    | 7.06  | 3.10 | 1 | 0     | n/a   | 0  | 4 | 4 | 1 | 47.5 | 2 | 3 | 7.76  | 4.46 | 1 | 1 | 2.91 | 1.44 | 6 | 5.20 | 3.82 | 4   |
| Hyp0665 | 19.44 | 10.45 | 0 | 0.020 | n/a   | 1    | 9.62  | 3.00 | 0 | 0.011 | n/a   | 1  | 4 | 4 | 1 | 31.3 | 2 | 2 | 10.10 | 5.59 | 1 | 2 | 4.31 | 2.11 | 6 | 7.24 | 3.88 | 4   |
| Hyp0666 | 22.06 | 10.30 | 0 | 0.013 | n/a   | 1    | 11.47 | 4.26 | 0 | 0.046 | n/a   | 0  | 4 | 4 | 1 | 42.0 | 2 | 3 | 10.63 | 4.83 | 1 | 2 | 4.67 | 1.97 | 6 | 6.50 | 3.89 | 4   |
| Hyp0669 | 16.39 | 9.09  | 1 | 0     | n/a   | 1    | 7.84  | 3.25 | 1 | 0     | n/a   | 0  | 4 | 4 | 1 | 29.8 | 2 | 3 | 11.05 | 6.34 | 1 | 2 | 5.08 | 2.14 | 6 | 6.00 | 3.58 | 4   |
| Hyp0670 | 16.74 | 8.68  | 0 | 0.003 | n/a   | 0.5  | 8.50  | 3.40 | 1 | 0     | n/a   | 0  | 4 | 4 | 1 | 40.6 | 2 | 2 | 10.84 | 5.72 | 1 | 2 | 5.32 | 2.04 | 6 | 6.71 | 3.96 | 4   |
| Hyp0673 | 22.20 | 5.73  | 0 | 0.018 | 0.092 | 6    | 16.59 | 3.66 | 0 | 0.021 | 0.121 | 10 | 2 | 2 | 1 | 51.3 | 2 | 1 | 13.79 | 5.48 | 2 | 1 | 6.10 | 0.90 | 2 | 5.82 | 3.33 | 2   |
| Hyp0674 | 19.26 | 4.73  | 0 | 0.012 | 0.101 | 8.5  | 14.75 | 3.31 | 0 | 0.007 | 0.104 | 10 | 2 | 2 | 1 | 49.8 | 2 | 1 | 12.18 | 5.18 | 2 | 1 | 5.07 | 1.10 | 3 | 5.71 | 3.40 | 2   |
| Hyp0677 | 14.97 | 8.56  | 0 | 0.015 | n/a   | 3.5  | 4.09  | 1.52 | 0 | 0.051 | n/a   | 5  | 4 | 4 | 0 | 31.3 | 2 | 3 | 10.32 | 6.35 | 1 | 1 | 4.58 | 2.17 | 6 | 6.70 | 3.26 | 4   |
| Hyp0678 | 16.91 | 8.01  | 0 | 0.011 | n/a   | 6    | 5.78  | 2.18 | 0 | 0.101 | n/a   | 6  | 4 | 4 | 1 | 29.8 | 2 | 3 | 10.40 | 4.90 | 1 | 1 | 4.27 | 2.00 | 6 | 6.42 | 3.83 | 4   |
| Hyp0681 | 16.73 | 6.00  | 1 | 0     | 0.037 | 9.5  | 11.74 | 3.29 | 1 | 0     | 0.066 | 4  | 2 | 2 | 0 | 57.3 | 2 | 1 | 15.45 | 7.66 | 2 | 1 | 7.02 | 1.21 | 2 | 6.14 | 3.34 | 3   |
| Hyp0682 | 17.81 | 7.61  | 0 | 0.001 | 0.029 | 6.5  | 12.37 | 3.99 | 1 | 0     | 0.026 | 9  | 2 | 2 | 1 | 52.5 | 2 | 1 | 13.47 | 6.50 | 2 | 3 | 6.62 | 1.18 | 1 | 6.24 | 3.75 | 1   |
| Hyp0685 | 18.53 | 7.24  | 0 | 0.001 | 0.078 | 4    | 10.94 | 3.81 | 1 | 0     | 0.115 | 4  | 2 | 2 | 1 | 50.0 | 2 | 2 | 13.81 | 6.19 | 2 | 1 | 5.83 | 1.42 | 1 | 6.63 | 5.05 | 1   |
| Hyp0686 | 19.30 | 7.50  | 0 | 0.004 | 0.064 | 1.5  | 13.66 | 4.28 | 0 | 0.005 | 0.082 | 2  | 2 | 2 | 1 | 49.0 | 2 | 2 | 14.16 | 5.85 | 2 | 1 | 5.71 | 1.36 | 1 | 6.16 | 4.46 | 1   |
| Hyp0697 | 17.75 | 11.52 | 0 | 0.016 | n/a   | 3    | 10.05 | 4.09 | 0 | 0.054 | n/a   | 5  | 4 | 4 | 1 | 34.0 | 2 | 2 | 8.80  | 5.31 | 1 | 1 | 4.56 | 2.66 | 6 | 5.14 | 4.06 | 4   |
| Hyp0698 | 18.69 | 5.70  | 0 | 0.002 | n/a   | 1.5  | 10.96 | 3.54 | 0 | 0.049 | n/a   | 1  | 4 | 4 | 1 | 49.5 | 2 | 2 | 10.38 | 5.13 | 1 | 1 | 4.19 | 2.13 | 6 | 4.67 | 3.90 | 4   |
| Hyp0701 | 17.81 | 8.52  | 1 | 0     | n/a   | 2    | 9.38  | 3.40 | 1 | 0     | n/a   | 0  | 4 | 4 | 1 | 42.5 | 2 | 2 | 9.55  | 5.63 | 1 | 1 | 4.73 | 2.20 | 6 | 5.52 | 3.53 | 4   |
| Hyp0702 | 15.66 | 8.09  | 1 | 0     | n/a   | 0.5  | 9.88  | 3.56 | 1 | 0     | n/a   | 1  | 4 | 4 | 1 | 46.0 | 2 | 3 | 10.38 | 5.05 | 1 | 1 | 4.13 | 2.06 | 6 | 4.84 | 4.05 | 4   |
| Hyp0714 | 17.48 | 6.99  | 1 | 0     | n/a   | 0    | 15.06 | 5.33 | 1 | 0     | n/a   | 0  | 4 | 4 | 1 | 53.5 | 2 | 3 | 10.81 | 4.06 | 1 | 2 | 4.34 | 1.84 | 6 | 7.93 | 4.24 | 4   |
| Hyp0716 | 18.81 | 10.58 | 1 | 0     | n/a   | 0    | 9.28  | 3.60 | 1 | 0     | n/a   | 0  | 4 | 4 | 1 | 46.0 | 2 | 3 | 10.28 | 5.35 | 1 | 2 | 3.33 | 2.01 | 6 | 7.60 | 4.25 | 4   |
| Hyp0725 | 11.76 | 3.05  | 1 | 0     | 0.145 | 32   | 10.05 | 2.37 | 0 | 0.013 | 0.200 | 29 | 2 | 2 | 1 | n/a  | 2 | 1 | 13.26 | 5.65 | 2 | 1 | 5.56 | 0.98 | 3 | 5.35 | 2.91 | 1   |
| Hyp0726 | 16.76 | 4.25  | 0 | 0.011 | 0.024 | 23.5 | 11.45 | 2.27 | 0 | 0.245 | 0.465 | 29 | 2 | 2 | 1 | 47.4 | 2 | 1 | 12.38 | 6.08 | 2 | 1 | 5.31 | 1.03 | 2 | 5.75 | 3.57 | 1   |
| Hyp0727 | 20.15 | 6.29  | 0 | 0.018 | 0.065 | 9    | 16.41 | 4.11 | 0 | 0.024 | 0.076 | 15 | 2 | 2 | 1 | 31.2 | 2 | 2 | 11.01 | 4.73 | 2 | 1 | 4.85 | 0.99 | 1 | 6.31 | 3.53 | 1   |
| Hyp0728 | 21.49 | 5.25  | 0 | 0.010 | 0.072 | 25   | 13.16 | 2.76 | 1 | 0     | 0.140 | 54 | 2 | 2 | 1 | 35.6 | 2 | 1 | 12.09 | 5.61 | 2 | 3 | 4.25 | 0.94 | 2 | 4.34 | 2.45 | 1   |
| Hyp0741 | 12.27 | 6.38  | 1 | 0     | n/a   | 0    | 9.07  | 2.53 | 1 | 0     | n/a   | 0  | 4 | 4 | 1 | 28.5 | 2 | 3 | 9.09  | 4.89 | 1 | 2 | 3.71 | 2.04 | 6 | 5.01 | 3.80 | 4   |
| Hyp0742 | 12.53 | 7.12  | 1 | 0     | n/a   | 0    | 6.87  | 2.89 | 1 | 0     | n/a   | 0  | 4 | 4 | 1 | 29.0 | 2 | 3 | 10.41 | 5.39 | 1 | 2 | 4.36 | 1.97 | 6 | 5.37 | 3.40 | 4   |
| Hyp0745 | 21.97 | 8.63  | 0 | 0.013 | n/a   | 7    | 10.71 | 3.57 | 0 | 0.008 | n/a   | 16 | 2 | 2 | 1 | 65.0 | 2 | 2 | 13.55 | 6.33 | 2 | 1 | 6.76 | 1.17 | 2 | 6.04 | 4.06 | 1   |
| Hyp0746 | 27.01 | 12.05 | 0 | 0.010 | n/a   | 5.5  | 12.12 | 4.38 | 0 | 0.030 | n/a   | 5  | 2 | 2 | 1 | 49.2 | 2 | 3 | 14.08 | 6.97 | 2 | 2 | 6.34 | 1.39 | 2 | 5.67 | 3.96 | 1   |
| Hyp0753 | 22.58 | 6.73  | 0 | 0.052 | 0.129 | 7    | 15.94 | 4.33 | 0 | 0.055 | 0.134 | 15 | 2 | 2 | 1 | 44.0 | 2 | 1 | 13.93 | 6.58 | 2 | 1 | 5.01 | 1.07 | 2 | 4.16 | 2.32 | 1   |

|         |       |       |   |       |       |      |       |      |   |       |       |    |   |   |   |      |   |   |       |      |   |   |      |      |   |      |      |   |
|---------|-------|-------|---|-------|-------|------|-------|------|---|-------|-------|----|---|---|---|------|---|---|-------|------|---|---|------|------|---|------|------|---|
| Hyp0754 | 18.65 | 6.66  | 0 | 0.003 | 0.055 | 14.5 | 12.30 | 3.13 | 1 | 0     | 0.116 | 13 | 2 | 2 | 1 | 48.8 | 2 | 1 | 13.81 | 7.00 | 2 | 3 | 5.70 | 1.19 | 1 | 5.97 | 3.37 | 1 |
| Hyp0755 | 14.12 | 4.72  | 0 | 0.017 | 0.088 | 20   | 10.80 | 2.44 | 0 | 0.036 | 0.193 | 15 | 2 | 2 | 1 | 46.3 | 2 | 1 | 12.90 | 6.08 | 2 | 1 | 6.18 | 1.23 | 1 | 7.51 | 3.08 | 1 |
| Hyp0756 | 19.14 | 4.79  | 0 | 0.004 | 0.085 | 21.5 | 14.63 | 2.83 | 0 | 0.031 | 0.215 | 21 | 2 | 2 | 1 | 51.4 | 2 | 1 | 11.05 | 5.44 | 2 | 1 | 5.25 | 0.92 | 1 | 6.04 | 3.51 | 1 |
| Hyp0761 | 11.83 | 5.49  | 1 | 0     | n/a   | 0    | 5.05  | 1.33 | 1 | 0     | n/a   | 0  | 4 | 4 | 1 | 26.5 | 2 | 3 | 11.14 | 5.53 | 1 | 2 | 4.77 | 1.81 | 6 | 4.89 | 3.15 | 4 |
| Hyp0762 | 12.50 | 4.48  | 1 | 0     | n/a   | 4    | 9.21  | 2.59 | 1 | 0     | n/a   | 2  | 4 | 4 | 1 | 32.2 | 2 | 3 | 11.05 | 4.96 | 1 | 1 | 3.63 | 1.31 | 6 | 5.52 | 3.43 | 4 |
| Hyp0765 | 14.43 | 3.70  | 0 | 0.046 | n/a   | 2    | 8.91  | 1.96 | 0 | 0.055 | n/a   | 1  | 2 | 2 | 1 | 56.2 | 2 | 1 | 12.63 | 5.20 | 2 | 1 | 4.85 | 0.89 | 2 | 6.67 | 3.55 | 1 |
| Hyp0766 | 15.24 | 4.75  | 0 | 0.015 | n/a   | 11.5 | 10.48 | 1.97 | 0 | 0.031 | n/a   | 18 | 2 | 2 | 1 | 37.8 | 2 | 1 | 11.32 | 5.82 | 2 | 3 | 5.50 | 0.81 | 2 | 6.11 | 2.94 | 1 |
| Hyp0767 | 20.66 | 5.44  | 0 | 0.036 | n/a   | 2.5  | 10.04 | 2.68 | 0 | 0.047 | n/a   | 11 | 2 | 2 | 1 | 51.4 | 2 | 3 | 12.83 | 5.92 | 2 | 1 | 5.58 | 0.74 | 2 | 6.83 | 3.26 | 1 |
| Hyp0768 | 18.04 | 5.75  | 0 | 0.005 | n/a   | 1    | 12.42 | 3.02 | 0 | 0.034 | n/a   | 1  | 2 | 2 | 1 | 55.8 | 2 | 1 | 11.16 | 4.54 | 2 | 3 | 5.56 | 0.73 | 2 | 4.15 | 2.69 | 1 |
| Hyp0769 | 10.85 | 6.17  | 1 | 0     | n/a   | 0    | 3.07  | 1.37 | 1 | 0     | n/a   | 0  | 4 | 4 | 1 | 30.0 | 2 | 2 | 10.63 | 5.03 | 2 | 1 | 4.53 | 1.84 | 6 | 5.95 | 3.62 | 4 |
| Hyp0770 | 13.38 | 5.74  | 1 | 0     | n/a   | 0    | 5.04  | 1.71 | 1 | 0     | n/a   | 0  | 4 | 4 | 1 | 32.4 | 2 | 3 | 10.77 | 5.17 | 1 | 2 | 4.49 | 1.66 | 6 | 5.86 | 3.86 | 4 |
| Hyp0773 | 23.11 | 7.64  | 0 | 0.002 | 0.055 | 9    | 14.23 | 3.72 | 0 | 0.006 | 0.132 | 17 | 2 | 2 | 1 | 51.8 | 2 | 1 | 10.99 | 5.62 | 2 | 1 | 5.34 | 1.05 | 2 | 5.39 | 3.24 | 1 |
| Hyp0774 | 29.02 | 5.92  | 0 | 0.004 | 0.094 | 3    | 16.67 | 3.20 | 1 | 0     | 0.131 | 7  | 2 | 2 | 1 | 50.8 | 2 | 1 | 12.88 | 7.14 | 2 | 1 | 5.94 | 1.16 | 2 | 6.61 | 3.56 | 3 |
| Hyp0775 | 27.17 | 8.60  | 0 | 0.005 | 0.057 | 9.5  | 15.03 | 3.52 | 0 | 0.006 | 0.150 | 10 | 2 | 2 | 1 | 49.0 | 2 | 1 | 12.91 | 6.13 | 2 | 1 | 6.63 | 1.07 | 2 | 7.25 | 3.06 | 1 |
| Hyp0776 | 21.77 | 7.57  | 0 | 0.005 | 0.050 | 9.5  | 13.11 | 3.89 | 0 | 0.019 | 0.050 | 5  | 2 | 2 | 1 | 35.8 | 2 | 1 | 11.87 | 6.36 | 2 | 1 | 6.16 | 1.13 | 1 | 6.58 | 3.52 | 1 |
| Hyp0777 | 17.02 | 6.74  | 1 | 0     | n/a   | 1.5  | 8.76  | 2.84 | 1 | 0     | n/a   | 0  | 2 | 2 | 1 | 46.4 | 2 | 1 | 14.03 | 5.96 | 2 | 2 | 6.29 | 0.98 | 2 | 6.56 | 4.00 | 1 |
| Hyp0785 | 15.74 | 9.47  | 1 | 0     | n/a   | 0    | 8.77  | 3.65 | 1 | 0     | n/a   | 0  | 4 | 4 | 1 | 30.3 | 2 | 2 | 11.86 | 5.28 | 1 | 2 | 4.64 | 1.85 | 6 | 5.73 | 3.52 | 4 |
| Hyp0786 | 15.61 | 8.04  | 1 | 0     | n/a   | 0    | 7.01  | 2.00 | 1 | 0     | n/a   | 0  | 4 | 4 | 1 | 38.0 | 2 | 2 | 11.44 | 5.45 | 2 | 1 | 4.26 | 2.35 | 6 | 5.26 | 3.55 | 4 |
| Hyp0814 | 21.97 | 11.90 | 0 | 0.011 | n/a   | 1    | 11.79 | 4.99 | 0 | 0.032 | n/a   | 0  | 4 | 4 | 1 | 49.6 | 2 | 3 | 9.96  | 5.99 | 1 | 2 | 3.79 | 1.97 | 6 | 6.76 | 4.23 | 4 |
| Hyp0815 | 13.74 | 9.04  | 1 | 0     | n/a   | 0    | 4.48  | 1.81 | 1 | 0     | n/a   | 0  | 4 | 4 | 1 | 32.0 | 2 | 3 | 8.58  | 4.29 | 1 | 2 | 4.28 | 1.74 | 6 | 5.40 | 3.62 | 4 |
| Hyp0841 | 23.01 | 6.60  | 1 | 0     | 0.053 | 0    | 15.71 | 3.69 | 0 | 0.011 | 0.148 | 2  | 2 | 2 | 1 | 70.0 | 2 | 1 | 13.63 | 7.20 | 2 | 3 | 6.08 | 1.14 | 2 | 8.15 | 4.66 | 1 |
| Hyp0845 | 23.69 | 8.68  | 0 | 0.028 | 0.115 | 4    | 16.62 | 4.42 | 0 | 0.035 | 0.182 | 8  | 2 | 2 | 1 | 52.3 | 2 | 2 | 15.59 | 6.44 | 2 | 2 | 7.01 | 1.32 | 2 | 6.14 | 3.74 | 1 |
| Hyp0849 | 23.01 | 9.40  | 0 | 0.002 | 0.055 | 14   | 15.70 | 4.77 | 0 | 0.004 | 0.123 | 16 | 2 | 2 | 1 | 50.6 | 2 | 1 | 11.46 | 5.89 | 2 | 3 | 4.08 | 1.28 | 2 | 4.66 | 3.15 | 3 |
| Hyp0850 | 20.11 | 7.51  | 0 | 0.021 | 0.109 | 16   | 16.44 | 4.42 | 0 | 0.022 | 0.149 | 16 | 2 | 2 | 1 | 51.5 | 2 | 1 | 10.12 | 5.65 | 2 | 1 | 4.22 | 0.77 | 2 | 6.35 | 3.06 | 3 |
| Hyp0851 | 24.89 | 5.80  | 0 | 0.005 | n/a   | 13   | 15.33 | 3.84 | 0 | 0.011 | n/a   | 14 | 2 | 2 | 1 | 47.2 | 2 | 4 | 10.97 | 5.12 | 2 | 3 | 3.13 | 0.70 | 3 | 5.97 | 3.13 | 2 |
| Hyp0852 | 23.48 | 6.12  | 0 | 0.007 | n/a   | 10   | 14.04 | 3.78 | 1 | 0     | n/a   | 13 | 2 | 2 | 1 | 44.0 | 2 | 1 | 12.00 | 4.20 | 2 | 1 | 4.75 | 0.76 | 2 | 7.41 | 3.00 | 2 |
| Hyp0857 | 16.34 | 10.41 | 1 | 0     | n/a   | 0    | 6.08  | 2.46 | 1 | 0     | n/a   | 0  | 4 | 4 | 1 | 27.0 | 2 | 3 | 9.52  | 5.42 | 1 | 2 | 4.04 | 1.75 | 6 | 7.31 | 3.88 | 4 |
| Hyp0858 | 15.83 | 9.01  | 0 | 0.006 | n/a   | 2    | 7.55  | 2.55 | 0 | 0.066 | n/a   | 1  | 4 | 4 | 1 | 28.5 | 2 | 2 | 9.75  | 5.42 | 2 | 2 | 4.22 | 1.74 | 6 | 5.57 | 3.80 | 4 |
| Hyp0870 | 16.59 | 9.15  | 1 | 0     | n/a   | 0    | 4.35  | 1.66 | 1 | 0     | n/a   | 0  | 4 | 4 | 1 | 28.2 | 2 | 2 | 12.09 | 6.28 | 2 | 2 | 4.57 | 2.12 | 6 | 5.14 | 3.63 | 4 |
| Hyp0871 | 14.52 | 8.29  | 1 | 0     | n/a   | 0    | 8.74  | 3.31 | 1 | 0     | n/a   | 0  | 4 | 4 | 1 | 31.7 | 2 | 2 | 10.52 | 5.45 | 2 | 1 | 4.59 | 1.92 | 6 | 5.95 | 3.22 | 4 |
| Hyp0872 | 14.75 | 7.05  | 1 | 0     | n/a   | 0    | 5.11  | 1.69 | 1 | 0     | n/a   | 0  | 4 | 4 | 1 | 31.0 | 2 | 2 | 11.82 | 5.95 | 1 | 2 | 5.26 | 2.09 | 6 | 6.12 | 3.59 | 4 |
| Hyp0873 | 10.74 | 5.48  | 1 | 0     | n/a   | 0    | 3.79  | 1.44 | 1 | 0     | n/a   | 0  | 4 | 4 | 1 | 31.7 | 2 | 3 | 11.70 | 4.67 | 2 | 2 | 4.21 | 1.91 | 6 | 5.02 | 3.29 | 4 |
| Hyp0874 | 13.59 | 6.97  | 1 | 0     | n/a   | 0    | 7.34  | 2.73 | 1 | 0     | n/a   | 0  | 4 | 4 | 1 | 32.6 | 2 | 2 | 9.52  | 4.76 | 1 | 2 | 4.29 | 1.62 | 6 | 5.87 | 3.47 | 4 |
| Hyp0897 | 22.55 | 9.59  | 1 | 0     | 0.072 | 0    | 12.97 | 5.10 | 1 | 0     | 0.125 | 0  | 4 | 4 | 1 | 59.0 | 2 | 2 | 15.87 | 6.57 | 1 | 2 | 6.83 | 2.32 | 6 | 5.12 | 3.75 | 4 |
| Hyp0898 | 25.18 | 10.17 | 1 | 0     | 0.072 | 0    | 10.58 | 2.91 | 1 | 0     | 0.186 | 0  | 4 | 4 | 1 | 56.5 | 2 | 2 | 13.59 | 4.92 | 1 | 3 | 5.40 | 2.23 | 6 | 4.54 | 3.37 | 4 |
| Hyp0899 | 20.46 | 8.89  | 1 | 0     | 0.075 | 0    | 12.54 | 3.96 | 1 | 0     | 0.090 | 0  | 4 | 4 | 1 | 59.8 | 2 | 1 | 13.03 | 5.16 | 1 | 1 | 4.89 | 2.14 | 6 | 5.02 | 3.96 | 4 |
| Hyp0900 | 23.19 | 10.69 | 1 | 0     | 0.062 | 0    | 12.26 | 5.22 | 1 | 0     | 0.129 | 1  | 4 | 4 | 1 | n/a  | 2 | 2 | 12.46 | 5.74 | 1 | 1 | 4.99 | 1.72 | 5 | 6.50 | 3.92 | 4 |
| Hyp0901 | 24.22 | 11.41 | 1 | 0     | n/a   | 0    | 14.19 | 4.79 | 1 | 0     | n/a   | 2  | 4 | 4 | 1 | 47.4 | 2 | 2 | 12.80 | 5.94 | 2 | 1 | 5.99 | 2.14 | 4 | 4.55 | 4.18 | 4 |
| Hyp0902 | 22.36 | 10.13 | 0 | 0.007 | n/a   | 1    | 12.34 | 3.60 | 1 | 0     | n/a   | 0  | 4 | 4 | 1 | 52.2 | 2 | 2 | 12.30 | 5.65 | 2 | 1 | 5.89 | 1.46 | 4 | 5.97 | 4.54 | 4 |
| Hyp0903 | 19.25 | 8.20  | 0 | 0.008 | n/a   | 1    | 11.12 | 4.09 | 1 | 0     | n/a   | 0  | 4 | 4 | 1 | 52.6 | 2 | 2 | 11.69 | 5.42 | 2 | 2 | 6.21 | 1.86 | 4 | 5.16 | 3.99 | 4 |
| Hyp0904 | 23.36 | 8.71  | 0 | 0.002 | n/a   | 0.5  | 12.34 | 3.77 | 1 | 0     | n/a   | 0  | 4 | 4 | 1 | 34.5 | 2 | 2 | 14.78 | 5.52 | 2 | 2 | 6.59 | 2.22 | 4 | 5.59 | 4.98 | 4 |
| Hyp0905 | 18.39 | 9.67  | 0 | 0.028 | n/a   | 3    | 2.55  | 1.05 | 0 | 0.119 | n/a   | 2  | 4 | 4 | 1 | n/a  | 2 | 3 | 10.43 | 5.81 | 1 | 1 | 4.64 | 2.24 | 6 | 6.39 | 3.90 | 4 |
| Hyp0906 | 17.46 | 8.86  | 0 | 0.005 | n/a   | 6    | 9.00  | 4.51 | 0 | 0.024 | n/a   | 4  | 4 | 4 | 1 | 29.0 | 2 | 2 | 11.06 | 5.13 | 1 | 1 | 4.50 | 2.11 | 5 | 6.63 | 4.61 | 4 |
| Hyp0913 | 23.49 | 11.18 | 0 | 0.002 | n/a   | 3    | 12.68 | 4.51 | 0 | 0.006 | n/a   | 1  | 4 | 4 | 1 | 46.0 | 2 | 3 | 12.28 | 5.68 | 1 | 2 | 5.03 | 2.34 | 6 | 6.30 | 4.39 | 4 |
| Hyp0914 | 22.72 | 9.51  | 0 | 0.008 | 0.094 | 1    | 10.25 | 3.45 | 1 | 0     | 0.225 | 0  | 4 | 4 | 1 | n/a  | 2 | 3 | 13.15 | 6.00 | 1 | 2 | 3.65 | 2.98 | 6 | 6.61 | 4.24 | 4 |
| Hyp0915 | 19.59 | 9.64  | 1 | 0     | 0.088 | 0    | 9.25  | 3.29 | 1 | 0     | 0.178 | 0  | 4 | 4 | 1 | 51.3 | 2 | 3 | 16.86 | 6.82 | 1 | 2 | 5.45 | 2.37 | 6 | 6.81 | 4.94 | 4 |

|         |       |       |   |       |       |      |       |      |   |       |       |    |   |   |   |      |   |   |       |      |   |   |      |      |   |      |      |     |
|---------|-------|-------|---|-------|-------|------|-------|------|---|-------|-------|----|---|---|---|------|---|---|-------|------|---|---|------|------|---|------|------|-----|
| Hyp0916 | 21.27 | 10.00 | 0 | 0.001 | n/a   | 1.5  | 13.41 | 4.63 | 1 | 0     | n/a   | 3  | 4 | 4 | 1 | 47.6 | 2 | 2 | 12.44 | 6.44 | 1 | 2 | 5.10 | 2.36 | 6 | 7.10 | 5.10 | 4   |
| Hyp0941 | 24.63 | 10.82 | 1 | 0     | 0.074 | 0    | 12.54 | 4.17 | 1 | 0     | 0.158 | 0  | 4 | 4 | 1 | 51.6 | 2 | 2 | 14.45 | 6.76 | 2 | 1 | 6.01 | 2.19 | 5 | 6.03 | 3.87 | 4   |
| Hyp0942 | 28.20 | 13.19 | 1 | 0     | 0.063 | 0    | 14.94 | 5.34 | 1 | 0     | 0.104 | 0  | 4 | 4 | 1 | 56.4 | 2 | 2 | 14.39 | 6.73 | 2 | 1 | 5.75 | 2.01 | 6 | 6.09 | 4.17 | 4   |
| Hyp0943 | 19.69 | 8.68  | 0 | 0.004 | n/a   | 1    | 9.28  | 2.96 | 1 | 0     | n/a   | 0  | 4 | 4 | 1 | 46.0 | 2 | 2 | 11.53 | 5.69 | 2 | 2 | 5.68 | 1.48 | 4 | 6.36 | 4.07 | 4   |
| Hyp0944 | 15.89 | 8.14  | 1 | 0     | n/a   | 0    | 5.81  | 1.69 | 1 | 0     | n/a   | 0  | 4 | 4 | 1 | 43.3 | 2 | 2 | 11.78 | 6.93 | 2 | 2 | 5.20 | 1.54 | 6 | 6.38 | 4.31 | 1   |
| Hyp0953 | 22.97 | 11.47 | 1 | 0     | n/a   | 0    | 15.28 | 4.95 | 1 | 0     | n/a   | 0  | 4 | 4 | 1 | 35.0 | 2 | 3 | 13.05 | 5.39 | 1 | 1 | 4.90 | 2.29 | 6 | 8.10 | 5.09 | 4   |
| Hyp0954 | 18.85 | 9.32  | 1 | 0     | n/a   | 0    | 7.56  | 3.61 | 1 | 0     | n/a   | 0  | 4 | 4 | 1 | 37.5 | 2 | 3 | 11.12 | 4.69 | 1 | 1 | 4.66 | 1.99 | 6 | 6.47 | 4.40 | 4   |
| Hyp0957 | 22.92 | 10.76 | 0 | 0.002 | 0.025 | 3    | 13.99 | 4.81 | 0 | 0.005 | 0.033 | 1  | 2 | 2 | 1 | 48.8 | 2 | 2 | 14.10 | 6.80 | 2 | 1 | 6.09 | 1.59 | 4 | 6.14 | 4.08 | 1   |
| Hyp0985 | 16.43 | 8.16  | 0 | 0.014 | n/a   | 2.5  | 11.74 | 4.62 | 1 | 0     | n/a   | 1  | 4 | 4 | 1 | 49.0 | 2 | 3 | 9.35  | 4.94 | 1 | 2 | 3.74 | 1.98 | 6 | 5.87 | 3.58 | 4   |
| Hyp0986 | 16.04 | 8.68  | 0 | 0.020 | n/a   | 3    | 5.01  | 2.13 | 1 | 0     | n/a   | 2  | 4 | 4 | 1 | n/a  | 3 | 3 | 9.00  | 5.30 | 1 | 1 | 4.02 | 2.54 | 6 | 7.07 | 3.98 | 4   |
| Hyp0993 | 23.45 | 9.75  | 0 | 0.001 | n/a   | 1    | 10.74 | 3.86 | 1 | 0     | n/a   | 0  | 4 | 4 | 1 | 51.0 | 2 | 2 | 11.07 | 4.72 | 2 | 2 | 5.73 | 1.89 | 6 | 6.11 | 4.54 | 4   |
| Hyp0994 | 22.21 | 9.17  | 0 | 0.001 | n/a   | 0    | 10.25 | 3.35 | 1 | 0     | n/a   | 0  | 4 | 4 | 1 | 46.8 | 2 | 2 | 10.49 | 4.40 | 1 | 2 | 5.46 | 1.73 | 6 | 6.64 | 4.41 | 4   |
| Hyp0995 | 25.66 | 11.13 | 1 | 0     | 0.033 | 0    | 13.39 | 4.36 | 1 | 0     | 0.109 | 0  | 4 | 4 | 1 | 52.6 | 3 | 3 | 12.73 | 5.11 | 1 | 1 | 5.46 | 2.22 | 6 | 7.23 | 4.78 | 4   |
| Hyp0996 | 21.86 | 10.72 | 1 | 0     | 0.036 | 0    | 8.74  | 2.72 | 1 | 0     | 0.187 | 0  | 4 | 4 | 1 | 54.7 | 2 | 3 | 13.26 | 5.10 | 1 | 2 | 6.04 | 2.45 | 6 | 5.75 | 4.33 | 4   |
| Hyp0997 | 25.93 | 9.51  | 0 | 0.001 | 0.062 | 0    | 12.61 | 4.29 | 1 | 0     | 0.082 | 0  | 4 | 4 | 1 | 57.8 | 3 | 3 | 11.77 | 5.77 | 1 | 2 | 4.51 | 1.94 | 6 | 5.26 | 3.89 | 4   |
| Hyp0998 | 25.70 | 10.56 | 0 | 0.001 | 0.035 | 0    | 14.13 | 4.85 | 1 | 0     | 0.098 | 0  | 4 | 4 | 1 | 56.0 | 3 | 3 | 10.57 | 5.56 | 1 | 2 | 3.22 | 1.71 | 6 | 4.96 | 3.83 | 4   |
| Hyp1006 | 38.80 | 20.77 | 1 | 0     | n/a   | 0.5  | 23.02 | 8.54 | 1 | 0     | n/a   | 0  | 4 | 4 | 1 | 51.3 | 2 | 2 | 10.36 | 4.53 | 1 | 2 | 3.96 | 2.05 | 6 | n/a  | n/a  | n/a |
| Hyp1073 | 21.22 | 12.84 | 1 | 0     | n/a   | 0    | 11.41 | 4.10 | 1 | 0     | n/a   | 0  | 4 | 4 | 1 | 50.3 | 2 | 2 | 10.71 | 4.50 | 1 | 1 | 3.29 | 2.11 | 5 | n/a  | n/a  | 4   |
| Hyp1074 | 28.78 | 13.34 | 1 | 0     | n/a   | 0    | 12.47 | 5.87 | 1 | 0     | n/a   | 0  | 4 | 4 | 1 | 47.3 | 2 | 2 | 13.12 | 6.46 | 1 | 1 | 4.84 | 2.78 | 6 | n/a  | n/a  | n/a |
| Hyp1080 | 18.44 | 10.06 | 1 | 0     | n/a   | 4    | 8.83  | 3.87 | 1 | 0     | n/a   | 3  | 4 | 4 | 1 | 30.5 | 1 | 5 | 11.52 | 5.23 | 1 | 3 | 4.14 | 1.74 | 6 | n/a  | n/a  | n/a |
| Hyp1081 | 18.33 | 11.44 | 1 | 0     | n/a   | 3.5  | 11.32 | 4.87 | 1 | 0     | n/a   | 4  | 4 | 4 | 1 | 31.5 | 1 | 5 | 11.03 | 4.81 | 1 | 3 | 4.23 | 1.84 | 6 | n/a  | n/a  | n/a |
| Hyp1094 | 27.62 | 15.50 | 0 | 0.001 | n/a   | 3.5  | 12.96 | 5.16 | 1 | 0     | n/a   | 2  | 4 | 4 | 1 | 39.8 | 1 | 5 | 11.98 | 6.08 | 1 | 3 | 4.63 | 2.41 | 6 | n/a  | n/a  | n/a |
| Hyp1103 | 21.14 | 12.44 | 1 | 0     | n/a   | 6.5  | 8.53  | 2.66 | 1 | 0     | n/a   | 7  | 4 | 4 | 1 | 34.0 | 2 | 1 | 13.28 | 5.93 | 1 | 1 | 5.37 | 2.40 | 6 | n/a  | n/a  | n/a |
| Hyp1111 | 28.28 | 12.66 | 0 | 0.002 | n/a   | 0.5  | 15.63 | 5.71 | 0 | 0.007 | n/a   | 3  | 4 | 4 | 1 | 34.4 | 2 | 2 | 14.41 | 6.71 | 1 | 2 | 6.04 | 2.03 | 6 | n/a  | n/a  | n/a |
| Hyp1115 | 25.66 | 14.70 | 1 | 0     | n/a   | 0    | 15.27 | 5.66 | 0 | 0.004 | n/a   | 2  | 4 | 4 | 1 | 45.8 | 2 | 2 | 10.60 | 4.34 | 2 | 2 | 4.14 | 1.63 | 6 | n/a  | n/a  | n/a |
| Hyp1116 | 20.63 | 9.19  | 0 | 0.008 | n/a   | 3.5  | 10.18 | 3.45 | 0 | 0.027 | n/a   | 7  | 4 | 4 | 1 | 50.4 | 2 | 2 | 12.06 | 5.40 | 2 | 2 | 5.24 | 1.48 | 4 | n/a  | n/a  | n/a |
| Hyp1118 | 28.12 | 15.67 | 0 | 0.005 | n/a   | 7    | 14.01 | 5.78 | 0 | 0.012 | n/a   | 8  | 4 | 4 | 1 | 35.4 | 2 | 2 | 15.01 | 6.55 | 2 | 2 | 6.91 | 2.74 | 6 | n/a  | n/a  | n/a |
| Hyp1119 | 20.82 | 10.74 | 0 | 0.003 | n/a   | 2    | 11.54 | 4.51 | 1 | 0     | n/a   | 0  | 4 | 4 | 1 | 50.5 | 2 | 2 | 11.09 | 4.98 | 2 | 2 | 4.89 | 2.15 | 6 | n/a  | n/a  | n/a |
| Hyp1122 | 32.82 | 14.59 | 1 | 0     | n/a   | 0    | 18.15 | 6.39 | 1 | 0     | n/a   | 0  | 4 | 4 | 1 | 50.8 | 2 | 2 | 11.98 | 4.96 | 2 | 2 | 4.81 | 1.88 | 6 | n/a  | n/a  | n/a |
| Hyp1188 | 17.60 | 4.18  | 1 | 0     | n/a   | 17   | 11.34 | 2.18 | 1 | 0     | n/a   | 4  | 2 | 2 | 1 | 64.6 | 2 | 1 | 8.77  | 4.11 | 2 | 3 | 4.64 | 0.81 | 2 | n/a  | n/a  | n/a |
| Hyp1200 | 17.02 | 4.10  | 1 | 0     | n/a   | 16   | 12.41 | 2.47 | 1 | 0     | n/a   | 16 | 2 | 2 | 1 | 56.6 | 2 | 1 | 11.26 | 4.80 | 2 | 1 | 5.79 | 0.96 | 2 | n/a  | n/a  | n/a |
| Hyp1224 | 12.93 | 4.32  | 0 | 0.005 | n/a   | 13.5 | 10.02 | 2.22 | 1 | 0     | n/a   | 36 | 2 | 2 | 1 | 39.6 | 2 | 1 | 9.42  | 3.65 | 2 | 3 | 3.91 | 0.91 | 2 | n/a  | n/a  | n/a |
| Hyp1253 | 21.81 | 9.72  | 0 | 0.018 | n/a   | 7.5  | 15.94 | 7.35 | 0 | 0.016 | n/a   | 3  | 2 | 2 | 1 | 42.4 | 2 | 4 | 15.38 | 6.21 | 2 | 1 | 7.78 | 1.04 | 2 | n/a  | n/a  | n/a |
| Hyp1259 | 14.63 | 6.08  | 0 | 0.011 | n/a   | 9.5  | 9.20  | 2.49 | 1 | 0     | n/a   | 12 | 2 | 2 | 1 | 57.6 | 2 | 1 | 9.83  | 4.01 | 2 | 3 | 4.22 | 0.79 | 2 | n/a  | n/a  | n/a |
| Hyp1264 | 22.59 | 6.04  | 0 | 0.004 | n/a   | 9    | 13.37 | 2.10 | 1 | 0     | n/a   | 4  | 2 | 2 | 1 | 55.0 | 2 | 1 | 12.74 | 5.44 | 2 | 1 | 5.70 | 0.90 | 2 | n/a  | n/a  | n/a |
| Hyp1305 | 25.07 | 13.03 | 0 | 0.011 | n/a   | 3.5  | 20.43 | 8.74 | 0 | 0.014 | n/a   | 6  | 4 | 4 | 1 | 52.5 | 2 | 2 | 11.92 | 5.43 | 2 | 2 | 5.46 | 1.52 | 4 | n/a  | n/a  | n/a |
| Hyp1311 | 21.19 | 7.78  | 0 | 0.016 | n/a   | 8    | 10.26 | 3.77 | 0 | 0.025 | n/a   | 13 | 2 | 2 | 1 | 47.8 | 2 | 3 | 8.36  | 3.84 | 2 | 2 | 4.21 | 0.62 | 2 | n/a  | n/a  | n/a |
| Hyp1316 | 15.41 | 5.94  | 0 | 0.007 | n/a   | 11.5 | 9.71  | 3.03 | 0 | 0.032 | n/a   | 3  | 2 | 2 | 1 | 45.8 | 2 | 1 | 10.52 | 5.51 | 2 | 3 | 5.57 | 0.94 | 2 | n/a  | n/a  | n/a |
| Hyp1400 | 15.35 | 7.60  | 1 | 0     | n/a   | 0    | 10.72 | 4.46 | 1 | 0     | n/a   | 1  | 2 | 4 | 1 | 53.8 | 2 | 1 | 10.46 | 4.91 | 2 | 3 | 4.54 | 2.05 | 4 | 5.10 | 3.75 | 4   |
| Hyp1401 | 17.01 | 8.08  | 0 | 0.003 | n/a   | 2    | 10.65 | 5.30 | 0 | 0.006 | n/a   | 0  | 2 | 4 | 1 | 51.3 | 2 | 3 | 10.36 | 5.84 | 2 | 2 | 4.14 | 1.68 | 4 | 4.14 | 2.99 | 4   |
| Hyp1410 | 11.62 | 7.98  | 0 | 0.005 | 0.089 | 4    | 7.50  | 3.61 | 0 | 0.012 | 0.141 | 4  | 2 | 2 | 1 | 46.4 | 2 | 4 | 12.55 | 6.18 | 2 | 1 | 4.87 | 1.37 | 1 | 7.01 | 3.44 | 1   |
| Hyp1411 | 7.60  | 4.69  | 1 | 0     | 0.065 | 8.5  | 5.92  | 2.72 | 1 | 0     | 0.040 | 9  | 2 | 2 | 1 | n/a  | 2 | 1 | 11.81 | 5.41 | 2 | 1 | 4.34 | 0.83 | 1 | 6.21 | 3.50 | 1   |
| Hyp1412 | 10.09 | 6.51  | 1 | 0     | 0.054 | 2.5  | 5.79  | 2.82 | 1 | 0     | 0.097 | 5  | 2 | 2 | 1 | 33.0 | 2 | 1 | 12.52 | 5.80 | 2 | 1 | 4.50 | 1.31 | 1 | 5.96 | 3.17 | 1   |
| Hyp1413 | 11.27 | 5.76  | 0 | 0.003 | n/a   | 9.5  | 7.54  | 2.71 | 1 | 0     | n/a   | 13 | 2 | 2 | 1 | 35.6 | 2 | 3 | 12.78 | 6.33 | 2 | 3 | 5.61 | 1.09 | 4 | 6.91 | 3.08 | 1   |
| Hyp1414 | 9.47  | 6.68  | 0 | 0.007 | n/a   | 13   | 5.16  | 2.75 | 1 | 0     | n/a   | 15 | 2 | 2 | 1 | 40.0 | 2 | 1 | 13.32 | 5.87 | 2 | 1 | 6.25 | 1.50 | 3 | 6.28 | 3.32 | 1   |
| Hyp1415 | 21.12 | 9.98  | 1 | 0     | n/a   | 0.5  | 4.79  | 1.64 | 1 | 0     | n/a   | 1  | 4 | 4 | 1 | 46.0 | 2 | 3 | 11.07 | 5.03 | 1 | 1 | 5.12 | 2.36 | 6 | 6.95 | 4.21 | 4   |

|         |       |       |   |       |       |      |       |       |   |       |       |    |   |   |   |      |   |   |       |      |   |   |      |      |   |      |      |     |
|---------|-------|-------|---|-------|-------|------|-------|-------|---|-------|-------|----|---|---|---|------|---|---|-------|------|---|---|------|------|---|------|------|-----|
| Hyp1416 | 21.14 | 12.31 | 0 | 0.008 | n/a   | 1    | 9.21  | 4.12  | 0 | 0.017 | n/a   | 3  | 4 | 4 | 1 | 33.6 | 2 | 3 | 11.66 | 5.49 | 1 | 2 | 4.83 | 2.12 | 6 | 6.08 | 4.23 | 4   |
| Hyp1423 | 16.01 | 10.47 | 0 | 0.022 | n/a   | 1.5  | 6.44  | 2.87  | 1 | 0     | n/a   | 1  | 4 | 4 | 1 | 34.2 | 2 | 3 | 9.01  | 5.13 | 1 | 2 | 4.52 | 2.29 | 6 | 5.72 | 3.65 | 4   |
| Hyp1424 | 12.80 | 9.21  | 0 | 0.008 | n/a   | 3.5  | 6.13  | 2.69  | 1 | 0     | n/a   | 3  | 4 | 4 | 1 | 28.2 | 2 | 2 | 10.06 | 4.88 | 1 | 2 | 3.49 | 2.00 | 5 | 4.56 | 3.48 | 4   |
| Hyp1431 | 15.42 | 8.02  | 0 | 0.014 | n/a   | 2    | 4.34  | 1.35  | 1 | 0     | n/a   | 4  | 4 | 4 | 1 | 29.3 | 2 | 2 | 10.71 | 5.26 | 2 | 2 | 4.59 | 2.35 | 6 | 4.91 | 2.86 | 4   |
| Hyp1432 | 16.86 | 10.41 | 0 | 0.024 | n/a   | 3    | 8.36  | 2.96  | 1 | 0     | n/a   | 2  | 4 | 4 | 1 | 26.3 | 2 | 3 | 9.81  | 4.90 | 1 | 2 | 3.66 | 1.68 | 6 | 5.56 | 3.70 | 4   |
| Hyp1435 | 17.38 | 7.24  | 0 | 0.036 | 0.107 | 7.5  | 10.84 | 3.57  | 0 | 0.025 | 0.165 | 8  | 2 | 2 | 1 | 49.4 | 2 | 2 | 15.76 | 7.53 | 2 | 2 | 6.35 | 1.40 | 1 | 6.92 | 4.18 | 1   |
| Hyp1436 | 16.17 | 6.64  | 0 | 0.029 | 0.116 | 7.5  | 8.16  | 2.44  | 0 | 0.016 | 0.160 | 8  | 2 | 2 | 1 | 50.8 | 2 | 2 | 16.16 | 7.23 | 2 | 2 | 6.25 | 1.37 | 1 | 6.42 | 3.96 | 1   |
| Hyp1443 | 14.81 | 6.32  | 1 | 0     | 0.027 | 6.5  | 9.53  | 2.86  | 1 | 0     | 0.012 | 8  | 2 | 2 | 1 | 58.6 | 2 | 2 | 13.84 | 7.67 | 2 | 3 | 6.26 | 1.30 | 1 | 6.72 | 4.44 | 1   |
| Hyp1445 | 14.87 | 6.39  | 1 | 0     | 0.023 | 4.5  | 9.45  | 2.64  | 1 | 0     | 0.026 | 7  | 2 | 2 | 1 | 57.0 | 2 | 2 | 13.16 | 6.76 | 2 | 1 | 5.80 | 1.33 | 1 | 5.69 | 3.99 | 1   |
| Hyp1446 | 17.86 | 7.54  | 1 | 0     | 0.015 | 4    | 11.17 | 3.28  | 1 | 0     | 0.017 | 3  | 2 | 2 | 1 | 56.0 | 2 | 2 | 13.35 | 6.99 | 2 | 1 | 6.35 | 1.29 | 1 | 6.71 | 4.11 | 1   |
| Hyp1459 | 16.04 | 10.45 | 1 | 0     | n/a   | 0    | 5.40  | 2.37  | 1 | 0     | n/a   | 0  | 4 | 4 | 1 | 31.3 | 2 | 3 | 9.08  | 4.18 | 1 | 2 | 3.89 | 1.58 | 6 | 8.07 | 3.75 | 4   |
| Hyp1460 | 9.64  | 5.66  | 1 | 0     | n/a   | 0    | 4.05  | 2.22  | 1 | 0     | n/a   | 0  | 4 | 4 | 1 | 28.5 | 2 | 2 | 9.14  | 5.21 | 2 | 2 | 3.61 | 1.67 | 6 | 7.21 | 2.99 | 4   |
| Hyp1463 | 13.70 | 6.75  | 1 | 0     | n/a   | 0    | 7.68  | 4.40  | 1 | 0     | n/a   | 0  | 4 | 4 | 1 | 31.7 | 2 | 2 | 9.71  | 4.62 | 2 | 2 | 4.68 | 1.88 | 6 | 5.94 | 3.15 | 4   |
| Hyp1464 | 15.53 | 6.41  | 1 | 0     | n/a   | 0    | 4.81  | 1.91  | 1 | 0     | n/a   | 0  | 4 | 4 | 1 | 29.5 | 3 | 2 | 9.91  | 5.26 | 1 | 2 | 4.99 | 1.62 | 6 | 7.31 | 3.76 | 4   |
| Hyp1471 | 15.83 | 9.12  | 1 | 0     | n/a   | 0    | 7.88  | 2.50  | 1 | 0     | n/a   | 0  | 4 | 4 | 1 | 47.3 | 2 | 2 | 12.48 | 5.92 | 1 | 1 | 4.41 | 2.17 | 6 | 6.15 | 3.81 | 4   |
| Hyp1472 | 18.35 | 9.32  | 1 | 0     | n/a   | 0    | 7.50  | 2.94  | 1 | 0     | n/a   | 0  | 4 | 4 | 1 | 29.2 | 2 | 3 | 11.30 | 5.64 | 1 | 2 | 5.18 | 2.36 | 6 | 5.73 | 3.12 | 4   |
| Hyp1503 | 24.17 | 15.09 | 0 | 0.003 | 0.031 | 3    | 19.39 | 9.28  | 0 | 0.002 | 0.055 | 3  | 4 | 4 | 1 | 45.8 | 3 | 2 | 14.74 | 6.93 | 1 | 2 | 7.25 | 3.18 | 5 | 5.02 | 3.83 | 4   |
| Hyp1504 | 20.93 | 11.20 | 0 | 0.010 | 0.069 | 3.5  | 13.63 | 5.86  | 1 | 0     | 0.092 | 8  | 4 | 4 | 1 | 43.5 | 3 | 2 | 13.32 | 5.86 | 1 | 2 | 5.55 | 2.81 | 5 | 7.98 | 4.91 | 4   |
| Hyp1505 | 24.38 | 12.18 | 0 | 0.020 | 0.070 | 4    | 10.62 | 4.61  | 0 | 0.020 | 0.176 | 6  | 4 | 4 | 1 | n/a  | 3 | 2 | 14.03 | 7.08 | 1 | 2 | 5.65 | 2.51 | 6 | 6.58 | 3.94 | 4   |
| Hyp1506 | 17.08 | 10.41 | 0 | 0.006 | 0.068 | 1.5  | 8.29  | 2.88  | 1 | 0     | 0.133 | 2  | 4 | 4 | 1 | 37.5 | 3 | 2 | 11.90 | 5.21 | 1 | 2 | 4.19 | 2.47 | 5 | n/a  | n/a  | n/a |
| Hyp1508 | 15.44 | 5.26  | 0 | 0.003 | n/a   | 12   | 9.62  | 2.38  | 0 | 0.028 | n/a   | 15 | 4 | 4 | 1 | 51.0 | 2 | 2 | 12.64 | 6.09 | 2 | 1 | 5.91 | 1.38 | 4 | 6.63 | 4.55 | 1   |
| Hyp1515 | 17.31 | 7.84  | 0 | 0.006 | 0.046 | 4.5  | 12.49 | 4.21  | 0 | 0.012 | 0.091 | 6  | 2 | 2 | 1 | 47.0 | 2 | 1 | 11.57 | 5.08 | 2 | 1 | 4.73 | 1.61 | 2 | 5.92 | 4.29 | 1   |
| Hyp1516 | 19.56 | 8.46  | 0 | 0.008 | 0.047 | 10   | 11.35 | 3.72  | 0 | 0.015 | 0.083 | 12 | 2 | 4 | 1 | 45.0 | 2 | 2 | 10.86 | 5.07 | 1 | 1 | 5.59 | 2.00 | 2 | 7.20 | 4.56 | 1   |
| Hyp1517 | 20.54 | 8.66  | 0 | 0.002 | 0.040 | 8    | 13.34 | 5.04  | 0 | 0.024 | 0.080 | 4  | 4 | 4 | 1 | 39.5 | 3 | 2 | 11.82 | 6.54 | 2 | 1 | 4.56 | 1.25 | 2 | 7.14 | 4.46 | 1   |
| Hyp1518 | 27.15 | 11.84 | 0 | 0.004 | 0.038 | 4.5  | 15.52 | 6.14  | 0 | 0.020 | 0.130 | 6  | 2 | 2 | 1 | 48.3 | 2 | 2 | 14.61 | 7.13 | 2 | 1 | 6.03 | 1.25 | 4 | 6.83 | 4.12 | 1   |
| Hyp1548 | 17.90 | 10.27 | 0 | 0.028 | n/a   | 2.5  | 12.69 | 4.44  | 0 | 0.023 | n/a   | 1  | 4 | 4 | 1 | 49.3 | 2 | 2 | 9.91  | 4.92 | 1 | 2 | 4.54 | 2.04 | 5 | 7.31 | 3.85 | 4   |
| Hyp1567 | 17.90 | 11.09 | 0 | 0.010 | 0.064 | 6    | 8.53  | 4.08  | 0 | 0.037 | 0.119 | 3  | 4 | 4 | 1 | n/a  | 3 | 2 | 10.95 | 6.56 | 2 | 2 | 3.96 | 2.06 | 5 | 9.30 | 4.53 | 4   |
| Hyp1568 | 18.33 | 8.72  | 0 | 0.001 | 0.091 | 3.5  | 8.97  | 3.79  | 1 | 0     | 0.103 | 2  | 4 | 4 | 1 | 48.5 | 3 | 2 | 13.31 | 6.45 | 1 | 2 | 4.83 | 2.16 | 6 | 8.70 | 4.96 | 4   |
| Hyp1583 | 18.04 | 8.36  | 1 | 0     | n/a   | 0    | 13.18 | 5.31  | 1 | 0     | n/a   | 0  | 4 | 4 | 1 | 26.0 | 2 | 2 | 10.96 | 4.85 | 1 | 1 | 4.73 | 1.68 | 5 | 4.54 | 3.05 | 4   |
| Hyp1593 | 14.69 | 5.29  | 0 | 0.004 | 0.073 | 5    | 9.06  | 2.32  | 1 | 0     | 0.106 | 6  | 2 | 4 | 1 | 52.0 | 2 | 1 | 12.94 | 6.98 | 2 | 1 | 6.63 | 1.02 | 1 | 8.08 | 3.75 | 1   |
| Hyp1594 | 16.23 | 6.81  | 0 | 0.007 | 0.068 | 12.5 | 13.14 | 5.05  | 0 | 0.005 | 0.096 | 8  | 2 | 4 | 1 | n/a  | 2 | 1 | 11.36 | 6.61 | 2 | 1 | 5.26 | 1.18 | 2 | 5.89 | 2.98 | 1   |
| Hyp1595 | 18.42 | 7.13  | 0 | 0.008 | 0.051 | 6    | 12.79 | 3.26  | 0 | 0.015 | 0.107 | 8  | 2 | 4 | 1 | 43.7 | 2 | 2 | 11.42 | 5.55 | 2 | 1 | 6.20 | 1.08 | 2 | 9.64 | 4.17 | 1   |
| Hyp1618 | 21.64 | 10.59 | 0 | 0.003 | n/a   | 4    | 13.32 | 4.70  | 1 | 0     | n/a   | 1  | 4 | 4 | 1 | 45.5 | 2 | 2 | 13.50 | 6.20 | 1 | 1 | 4.98 | 2.01 | 6 | 6.26 | 4.41 | 4   |
| Hyp1619 | 20.65 | 10.82 | 0 | 0.008 | n/a   | 4    | 11.21 | 4.96  | 1 | 0     | n/a   | 1  | 4 | 4 | 1 | 34.0 | 2 | 2 | 13.44 | 6.16 | 1 | 2 | 4.50 | 2.37 | 6 | 5.28 | 3.73 | 4   |
| Hyp1620 | 22.43 | 11.10 | 0 | 0.006 | n/a   | 2    | 14.37 | 5.53  | 0 | 0.004 | n/a   | 1  | 2 | 4 | 1 | 49.0 | 2 | 2 | 12.13 | 5.02 | 1 | 2 | 4.34 | 1.90 | 6 | 6.08 | 4.13 | 4   |
| Hyp1621 | 19.93 | 9.98  | 1 | 0     | n/a   | 2    | 12.22 | 4.35  | 1 | 0     | n/a   | 1  | 2 | 4 | 1 | 47.3 | 2 | 2 | 11.69 | 4.76 | 1 | 2 | 4.44 | 2.14 | 6 | 6.11 | 4.52 | 4   |
| Hyp1622 | 21.24 | 10.85 | 0 | 0.008 | n/a   | 3    | 14.64 | 6.32  | 0 | 0.007 | n/a   | 1  | 2 | 4 | 1 | 51.0 | 2 | 2 | 12.99 | 5.90 | 1 | 2 | 4.95 | 2.13 | 6 | 5.77 | 3.27 | 4   |
| Hyp1623 | 20.19 | 9.00  | 1 | 0     | 0.056 | 0    | 9.57  | 2.62  | 1 | 0     | 0.165 | 0  | 4 | 4 | 1 | 58.5 | 2 | 2 | 13.91 | 6.01 | 1 | 2 | 4.81 | 1.81 | 5 | 5.22 | 3.97 | 4   |
| Hyp1625 | 20.99 | 11.89 | 0 | 0.007 | n/a   | 3.5  | 7.69  | 2.26  | 1 | 0     | n/a   | 3  | 2 | 4 | 1 | 44.0 | 2 | 2 | 10.00 | 5.15 | 2 | 2 | 4.95 | 1.89 | 6 | 7.16 | 4.40 | 4   |
| Hyp1626 | 23.05 | 13.84 | 0 | 0.006 | n/a   | 3    | 12.98 | 7.40  | 1 | 0     | n/a   | 4  | 2 | 4 | 1 | 54.5 | 2 | 2 | 11.17 | 5.93 | 2 | 2 | 4.20 | 1.95 | 6 | 6.17 | 3.80 | 4   |
| Hyp1627 | 26.51 | 14.29 | 1 | 0     | n/a   | 3    | 15.23 | 6.46  | 1 | 0     | n/a   | 1  | 2 | 4 | 1 | 45.7 | 2 | 2 | 12.51 | 5.57 | 2 | 2 | 5.64 | 1.93 | 6 | 5.07 | 3.70 | 1   |
| Hyp1628 | 25.99 | 14.19 | 0 | 0.013 | n/a   | 3.5  | 18.57 | 8.80  | 0 | 0.002 | n/a   | 3  | 2 | 4 | 1 | 55.3 | 2 | 2 | 11.68 | 6.46 | 2 | 1 | 5.54 | 2.13 | 6 | 5.63 | 4.01 | 4   |
| Hyp1629 | 27.84 | 15.20 | 0 | 0.007 | n/a   | 3.5  | 19.67 | 11.03 | 0 | 0.009 | n/a   | 5  | 4 | 4 | 1 | 48.8 | 2 | 2 | 9.88  | 4.06 | 2 | 1 | 4.47 | 1.58 | 6 | 5.35 | 4.32 | 4   |
| Hyp1630 | 23.93 | 12.91 | 0 | 0.010 | n/a   | 3    | 19.29 | 7.55  | 0 | 0.009 | n/a   | 5  | 2 | 4 | 1 | 50.5 | 2 | 2 | 9.69  | 4.47 | 2 | 1 | 5.07 | 1.71 | 6 | 5.83 | 4.45 | 4   |
| Hyp1631 | 27.65 | 16.09 | 1 | 0     | n/a   | 2    | 12.80 | 6.37  | 1 | 0     | n/a   | 2  | 2 | 4 | 1 | 50.5 | 2 | 2 | 14.02 | 4.90 | 2 | 2 | 6.25 | 2.08 | 6 | 4.59 | 3.29 | 4   |
| Hyp1632 | 25.99 | 15.37 | 0 | 0.002 | n/a   | 2    | 16.70 | 6.80  | 1 | 0     | n/a   | 2  | 2 | 4 | 1 | 46.5 | 2 | 2 | 12.39 | 5.43 | 2 | 2 | 5.44 | 2.23 | 6 | 4.17 | 3.40 | 4   |



|         |       |       |     |       |       |      |       |      |     |       |       |    |     |   |   |      |   |   |       |      |   |   |       |      |   |      |      |     |
|---------|-------|-------|-----|-------|-------|------|-------|------|-----|-------|-------|----|-----|---|---|------|---|---|-------|------|---|---|-------|------|---|------|------|-----|
| Hyp1707 | 28.40 | 15.43 | 1   | 0     | n/a   | 0    | 11.64 | 4.40 | 1   | 0     | n/a   | 0  | 2   | 4 | 1 | 53.5 | 2 | 2 | 11.80 | 5.23 | 2 | 1 | 4.52  | 2.28 | 6 | 4.59 | 3.24 | 1   |
| Hyp1718 | 15.64 | 7.87  | 1   | 0     | n/a   | 1.5  | 9.34  | 4.99 | 1   | 0     | n/a   | 2  | 4   | 4 | 1 | 45.5 | 2 | 2 | 10.42 | 5.31 | 1 | 2 | 4.48  | 2.04 | 6 | 6.25 | 3.75 | 1   |
| Hyp1719 | 14.43 | 7.33  | n/a | 0     | n/a   | 1    | 7.76  | 2.31 | n/a | 0     | n/a   | 0  | 2   | 4 | 1 | 35.0 | 2 | 3 | 9.48  | 4.11 | 1 | 2 | 3.97  | 1.35 | 5 | 6.94 | 3.79 | 4   |
| Hyp1720 | 13.37 | 6.30  | 1   | 0     | n/a   | 1.5  | 6.66  | 2.72 | 1   | 0     | n/a   | 0  | 4   | 4 | 1 | 48.0 | 2 | 2 | 9.06  | 4.98 | 1 | 2 | 3.63  | 1.72 | 6 | 6.28 | 4.05 | 4   |
| Hyp1738 | 23.51 | 10.58 | n/a | 0     | n/a   | 0    | 11.91 | 4.11 | n/a | 0     | n/a   | 0  | 4   | 4 | 1 | 49.0 | 2 | 3 | 10.81 | 4.76 | 2 | 2 | 5.54  | 1.56 | 5 | 6.21 | 4.30 | 1   |
| Hyp1739 | 33.88 | 13.35 | n/a | 0     | n/a   | 0    | 20.40 | 6.32 | n/a | 0     | n/a   | 0  | 2   | 4 | 1 | 50.3 | 2 | 2 | 12.93 | 6.07 | 2 | 3 | 5.50  | 1.73 | 4 | 5.66 | 4.28 | 1   |
| Hyp1817 | 21.71 | 5.69  | 1   | 0     | n/a   | 6    | 15.37 | 3.14 | 1   | 0     | n/a   | 9  | 2   | 2 | 1 | 48.8 | 2 | 1 | 13.14 | 5.36 | 2 | 3 | 6.55  | 0.89 | 2 | 6.63 | 3.24 | 3   |
| Hyp2052 | 20.92 | 5.96  | 0   | 0.012 | 0.061 | 7    | 13.29 | 3.22 | 0   | 0.015 | 0.082 | 6  | 2   | 2 | 1 | n/a  | 2 | 1 | 11.33 | 5.97 | 2 | 1 | 3.70  | 0.73 | 3 | 7.93 | 3.56 | 3   |
| Hyp2053 | 19.41 | 6.31  | 0   | 0.005 | 0.066 | 11   | 12.64 | 2.73 | 0   | 0.028 | 0.148 | 11 | 2   | 2 | 1 | 49.3 | 2 | 1 | 12.08 | 7.30 | 2 | 1 | 3.87  | 0.80 | 1 | 6.62 | 3.59 | 3   |
| Hyp2054 | 21.38 | 5.35  | 0   | 0.008 | 0.060 | 10.5 | 13.55 | 3.05 | 1   | 0     | 0.085 | 14 | 2   | 2 | 1 | n/a  | 2 | 4 | 14.49 | 8.52 | 2 | 1 | 5.75  | 0.80 | 3 | 7.94 | 3.45 | 3   |
| Hyp2055 | 13.62 | 5.08  | 0   | 0.014 | 0.147 | 10.5 | 9.81  | 2.33 | 1   | 0     | 0.209 | 20 | 2   | 2 | 1 | 52.0 | 2 | 1 | 11.18 | 5.53 | 2 | 1 | 3.98  | 1.09 | 1 | 7.53 | 3.47 | 3   |
| Hyp2056 | 22.05 | 4.72  | 0   | 0.006 | 0.068 | 9    | 16.37 | 2.62 | 1   | 0     | 0.067 | 7  | 2   | 2 | 1 | 48.0 | 2 | 1 | 13.27 | 6.79 | 2 | 3 | 5.17  | 0.97 | 1 | 7.39 | 3.79 | 3   |
| Hyp2099 | 21.43 | 11.96 | 0   | 0.006 | n/a   | 2    | 13.62 | 6.55 | 1   | 0     | n/a   | 1  | 4   | 4 | 1 | 46.8 | 2 | 2 | 10.65 | 5.13 | 1 | 2 | 3.54  | 1.69 | 6 | n/a  | n/a  | n/a |
| Hyp2100 | 28.36 | 13.77 | 0   | 0.011 | n/a   | 3    | 14.83 | 6.89 | 0   | 0.003 | n/a   | 8  | 4   | 4 | 1 | 50.0 | 2 | 2 | 11.02 | 4.69 | 1 | 2 | 3.49  | 1.66 | 6 | 5.86 | 4.11 | 4   |
| Hyp2225 | 23.60 | 5.73  | 0   | 0.008 | n/a   | 3    | 11.80 | 2.60 | 0   | 0.021 | n/a   | 5  | 2   | 2 | 1 | 53.8 | 2 | 2 | 14.48 | 7.59 | 2 | 1 | 5.48  | 1.22 | 2 | 6.73 | 3.63 | 1   |
| Hyp2228 | 19.40 | 6.28  | n/a | 0     | n/a   | 3    | 11.91 | 3.12 | n/a | 0.017 | n/a   | 4  | 2   | 2 | 1 | 61.0 | 2 | 3 | 13.12 | 6.39 | 2 | 1 | 4.52  | 1.53 | 2 | 6.12 | 4.04 | 1   |
| Hyp2235 | 16.28 | 10.76 | n/a | 0     | n/a   | 1    | 18.43 | 6.51 | 0   | 0.003 | 0.011 | 1  | 2   | 2 | 1 | n/a  | 2 | 4 | 13.80 | 6.21 | 2 | 1 | 6.54  | 1.25 | 2 | n/a  | n/a  | n/a |
| Hyp2237 | 16.41 | 5.33  | 0   | 0.007 | 0.070 | 1.5  | 9.56  | 2.72 | 1   | 0     | 0.098 | 2  | 2   | 2 | 1 | n/a  | 2 | 2 | 13.27 | 6.33 | 2 | 1 | 6.12  | 1.28 | 2 | n/a  | n/a  | n/a |
| Hyp2238 | 17.25 | 6.60  | 0   | 0.005 | 0.056 | 2    | 12.23 | 4.09 | 1   | 0     | 0.095 | 4  | 2   | 2 | 1 | 49.0 | 2 | 2 | 12.33 | 6.75 | 2 | 1 | 5.98  | 1.34 | 1 | n/a  | n/a  | n/a |
| Hyp2250 | 30.34 | 11.09 | 1   | 0     | n/a   | 0.5  | 15.48 | 5.21 | 1   | 0     | n/a   | 0  | 4   | 4 | 1 | 48.2 | 2 | 3 | 13.25 | 5.68 | 1 | 2 | 5.23  | 2.32 | 6 | n/a  | n/a  | n/a |
| Hyp2260 | 15.32 | 4.94  | 0   | 0.017 | n/a   | 13   | 11.55 | 3.24 | 0   | 0.009 | n/a   | 8  | 2   | 2 | 1 | 51.0 | 2 | 2 | 10.36 | 4.12 | 2 | 1 | 6.28  | 0.88 | 2 | n/a  | n/a  | n/a |
| Hyp2261 | 24.27 | 11.36 | 0   | 0.001 | 0.037 | 6    | 11.65 | 3.44 | 1   | 0     | 0.056 | 13 | 2   | 2 | 1 | 49.2 | 2 | 1 | 11.87 | 5.64 | 2 | 1 | 6.67  | 1.24 | 4 | 5.79 | 3.35 | 1   |
| Hyp2262 | 23.53 | 12.89 | 0   | 0.010 | n/a   | 0.5  | 6.51  | 2.21 | 1   | 0     | n/a   | 1  | 4   | 4 | 1 | 48.0 | 2 | 3 | 10.34 | 4.07 | 1 | 2 | 4.27  | 1.83 | 6 | n/a  | n/a  | n/a |
| Hyp2263 | 14.86 | 9.16  | 0   | 0.005 | n/a   | 1    | 8.70  | 3.85 | 0   | 0.010 | n/a   | 1  | 4   | 4 | 1 | 47.0 | 2 | 2 | 12.10 | 5.17 | 1 | 2 | 5.06  | 2.43 | 6 | n/a  | n/a  | n/a |
| Hyp2266 | 29.00 | 14.45 | 1   | 0     | n/a   | 0    | 11.49 | 4.99 | 1   | 0     | n/a   | 0  | 4   | 4 | 1 | 46.0 | 2 | 3 | 10.81 | 6.57 | 1 | 2 | 5.30  | 2.58 | 6 | 7.67 | 5.15 | 4   |
| Hyp2302 | 19.14 | 5.56  | 0   | 0.032 | n/a   | 22   | 10.71 | 2.93 | 0   | 0.081 | n/a   | 33 | 2   | 2 | 1 | 41.6 | 2 | 2 | 8.91  | 4.41 | 2 | 3 | 5.41  | 0.74 | 2 | 6.53 | 4.29 | 1   |
| Hyp2759 | 22.41 | 10.33 | 0   | 0.005 | n/a   | 0.5  | 11.06 | 4.28 | 0   | 0.020 | n/a   | 2  | 2   | 4 | 1 | 30.0 | 2 | 2 | 12.88 | 6.00 | 2 | 1 | 4.54  | 1.85 | 6 | 4.97 | 3.36 | 1   |
| Hyp2913 | 30.09 | 10.51 | 0   | 0.017 | 0.060 | 3    | 15.08 | 4.59 | 0   | 0.023 | 0.101 | 1  | 2   | 2 | 1 | 60.0 | 3 | 2 | 14.17 | 6.18 | 2 | 1 | 6.66  | 1.05 | 2 | n/a  | n/a  | n/a |
| Hyp2914 | 26.12 | 11.38 | 0   | 0.001 | 0.040 | 5.5  | 18.41 | 6.83 | 0   | 0.003 | 0.068 | 6  | n/a | 2 | 1 | 51.8 | 2 | 4 | 12.59 | 5.74 | 2 | 3 | 6.55  | 1.07 | 2 | n/a  | n/a  | n/a |
| Hyp2915 | 28.68 | 13.52 | 1   | 0     | 0.027 | 7    | 20.96 | 8.03 | 1   | 0     | 0.045 | 4  | 2   | 2 | 1 | 59.0 | 2 | 2 | 15.92 | 7.46 | 2 | 3 | 18.96 | 1.70 | 2 | n/a  | n/a  | n/a |
| Hyp2916 | 27.65 | 12.32 | 0   | 0.001 | 0.025 | 4.5  | 22.73 | 8.06 | 1   | 0     | 0.043 | 3  | 2   | 2 | 1 | 52.5 | 2 | 1 | 13.49 | 5.96 | 2 | 3 | 7.42  | 1.07 | 2 | n/a  | n/a  | n/a |
| Hyp2917 | 26.24 | 11.09 | 0   | 0.010 | 0.032 | 8.5  | 14.78 | 5.85 | 0   | 0.029 | 0.118 | 9  | 2   | 2 | 1 | 54.5 | 2 | 2 | 12.96 | 5.75 | 2 | 1 | 6.79  | 1.64 | 2 | 7.67 | 4.60 | 1   |
| Hyp2918 | 33.16 | 13.02 | 0   | 0.004 | 0.029 | 4.5  | 22.60 | 6.30 | 0   | 0.009 | 0.092 | 7  | 2   | 2 | 1 | 53.0 | 2 | 2 | 14.35 | 6.13 | 2 | 1 | 7.71  | 1.30 | 2 | n/a  | n/a  | n/a |
| Hyp2922 | 34.26 | 14.49 | 0   | 0.006 | 0.032 | 5.5  | 19.98 | 7.21 | 0   | 0.011 | 0.057 | 4  | 2   | 2 | 1 | 36.5 | 2 | 2 | 14.02 | 7.44 | 2 | 1 | 7.52  | 1.25 | 2 | n/a  | n/a  | n/a |
| Hyp2923 | 17.38 | 5.48  | 1   | 0     | 0.042 | 3.5  | 12.03 | 3.39 | 1   | 0     | 0.039 | 6  | 2   | 2 | 1 | n/a  | 2 | 1 | 13.45 | 6.56 | 2 | 3 | 7.22  | 1.04 | 2 | 6.31 | 3.97 | 1   |
| Hyp2924 | 23.54 | 8.17  | 0   | 0.003 | 0.042 | 4.5  | 17.24 | 4.30 | 0   | 0.009 | 0.090 | 2  | 2   | 2 | 1 | 45.0 | 2 | 1 | 11.84 | 6.36 | 2 | 3 | 6.42  | 0.81 | 2 | n/a  | n/a  | n/a |
| Hyp2925 | 25.97 | 10.58 | 0   | 0.005 | 0.013 | 3.5  | 19.98 | 6.55 | 0   | 0.002 | 0.039 | 2  | 2   | 2 | 1 | 48.8 | 2 | 2 | 13.31 | 7.32 | 2 | 1 | 6.70  | 1.06 | 2 | n/a  | n/a  | n/a |
| Hyp2926 | 30.21 | 14.05 | 0   | 0.001 | 0.024 | 3.5  | 22.09 | 7.18 | 0   | 0.006 | 0.070 | 6  | 2   | 2 | 1 | 48.5 | 2 | 2 | 13.07 | 5.94 | 2 | 1 | 6.70  | 1.25 | 2 | n/a  | n/a  | n/a |
| Hyp2928 | 6.27  | 2.51  | 1   | 0     | 0.079 | 17   | 5.85  | 1.93 | 1   | 0     | 0.085 | 17 | 2   | 2 | 0 | n/a  | 2 | 1 | 9.69  | 5.26 | 2 | 3 | 3.37  | 0.79 | 2 | n/a  | n/a  | n/a |
| Hyp2929 | 10.93 | 3.27  | 1   | 0     | 0.092 | 6    | 7.14  | 2.20 | 1   | 0     | 0.041 | 14 | 2   | 2 | 0 | n/a  | 2 | 2 | 10.68 | 5.70 | 2 | 3 | 4.12  | 0.78 | 2 | n/a  | n/a  | n/a |
| Hyp2932 | 11.65 | 2.42  | 1   | 0     | 0.092 | 16   | 10.46 | 2.64 | 1   | 0     | 0.092 | 19 | 2   | 2 | 1 | 50.3 | 2 | 4 | 11.02 | 5.19 | 2 | 3 | 4.90  | 0.94 | 2 | n/a  | n/a  | n/a |
| Hyp2935 | 16.85 | 6.86  | 1   | 0     | n/a   | 6    | 8.60  | 3.17 | 1   | 0     | 0.187 | 22 | 2   | 2 | 1 | 47.0 | 2 | 1 | 9.45  | 6.15 | 2 | 1 | 4.18  | 1.02 | 2 | n/a  | n/a  | n/a |
| Hyp2936 | 21.57 | 7.76  | 0   | 0.004 | n/a   | 3.5  | 12.76 | 3.45 | 0   | 0.014 | 0.152 | 0  | 2   | 2 | 1 | 46.8 | 2 | 1 | 8.72  | 4.97 | 2 | 1 | 4.26  | 0.76 | 2 | n/a  | n/a  | n/a |
| Hyp2937 | 14.77 | 4.37  | 1   | 0     | 0.085 | 1    | 10.41 | 2.16 | 1   | 0     | 0.212 | 1  | 2   | 2 | 1 | 30.5 | 2 | 1 | 9.86  | 5.13 | 2 | 3 | 4.19  | 0.98 | 2 | n/a  | n/a  | n/a |
| Hyp2938 | 16.87 | 5.95  | 1   | 0     | n/a   | 1.5  | 13.71 | 4.31 | 1   | 0     | n/a   | 1  | 2   | 2 | 1 | 33.0 | 2 | 1 | 8.28  | 4.15 | 2 | 1 | 3.46  | 0.80 | 2 | 5.32 | 3.06 | 3   |
| Hyp2939 | 24.10 | 8.71  | 0   | 0.006 | 0.059 | 4    | 17.47 | 3.91 | 0   | 0.019 | 0.163 | 0  | 2   | 2 | 1 | 30.0 | 2 | 1 | 9.82  | 5.13 | 2 | 3 | 3.93  | 0.45 | 2 | 5.27 | 3.22 | 3   |

|         |       |       |     |       |       |      |       |      |   |       |       |    |   |   |   |      |   |   |       |      |   |   |      |      |   |      |      |     |
|---------|-------|-------|-----|-------|-------|------|-------|------|---|-------|-------|----|---|---|---|------|---|---|-------|------|---|---|------|------|---|------|------|-----|
| Hyp2940 | 15.13 | 5.36  | 0   | 0.006 | 0.077 | 0.5  | 10.42 | 2.38 | 1 | 0     | 0.064 | 1  | 2 | 2 | 1 | 36.8 | 2 | 1 | 9.83  | 5.08 | 2 | 3 | 5.00 | 0.92 | 2 | n/a  | n/a  | n/a |
| Hyp2941 | 18.54 | 5.92  | 1   | 0     | 0.034 | 0    | 13.11 | 3.12 | 0 | 0.008 | 0.171 | 0  | 2 | 2 | 1 | 31.0 | 2 | 1 | 9.60  | 5.02 | 2 | 3 | 3.62 | 0.98 | 2 | 6.29 | 3.29 | 3   |
| Hyp2942 | 20.43 | 8.17  | 0   | 0.002 | 0.045 | 3    | 13.31 | 4.34 | 1 | 0     | 0.077 | 7  | 2 | 2 | 1 | 52.0 | 2 | 4 | 12.64 | 5.39 | 2 | 1 | 5.70 | 0.90 | 2 | 6.64 | 3.39 | 3   |
| Hyp2943 | 23.21 | 6.18  | n/a | 0     | n/a   | 7    | 15.54 | 3.36 | 0 | 0.006 | 0.128 | 8  | 2 | 2 | 1 | 51.0 | 2 | 1 | 10.73 | 5.34 | 2 | 1 | 4.74 | 0.70 | 2 | 6.61 | 2.73 | 3   |
| Hyp2944 | 10.99 | 3.30  | n/a | 0     | 0.120 | 14   | 7.74  | 1.93 | 1 | 0     | 0.107 | 20 | 2 | 2 | 1 | 45.0 | 2 | 4 | 8.70  | 5.66 | 2 | 1 | 4.29 | 0.88 | 2 | n/a  | n/a  | n/a |
| Hyp2945 | 24.47 | 8.70  | 1   | 0     | 0.018 | 0    | 15.74 | 5.42 | 1 | 0     | 0.049 | 0  | 2 | 2 | 1 | 36.0 | 2 | 1 | 10.79 | 6.00 | 2 | 3 | 4.27 | 1.08 | 2 | 5.32 | 3.26 | 3   |
| Hyp2946 | 22.96 | 7.08  | 1   | 0     | 0.018 | 6.5  | 18.86 | 4.01 | 1 | 0     | 0.076 | 14 | 2 | 2 | 1 | 37.3 | 2 | 1 | 10.63 | 4.59 | 2 | 3 | 4.32 | 0.79 | 2 | 6.15 | 3.19 | 1   |
| Hyp2947 | 18.97 | 6.35  | 0   | 0.006 | 0.065 | 11   | 11.84 | 2.35 | 1 | 0     | 0.114 | 10 | 2 | 2 | 1 | 48.5 | 2 | 1 | 11.04 | 5.24 | 2 | 1 | 5.08 | 1.04 | 2 | n/a  | n/a  | n/a |
| Hyp2948 | 12.97 | 4.09  | 0   | 0.011 | 0.059 | 12.5 | 13.68 | 3.41 | 0 | 0.007 | 0.082 | 9  | 2 | 2 | 1 | n/a  | 2 | 1 | 9.78  | 5.33 | 2 | 3 | 6.17 | 1.13 | 2 | n/a  | n/a  | n/a |
| Hyp2949 | 22.72 | 5.60  | 0   | 0.004 | 0.019 | 1    | 18.27 | 4.32 | 1 | 0     | 0.089 | 9  | 2 | 2 | 1 | 50.0 | 2 | 1 | 10.59 | 5.24 | 2 | 3 | 4.28 | 0.85 | 3 | n/a  | n/a  | n/a |
| Hyp2950 | 15.41 | 4.44  | 0   | 0.011 | 0.071 | 5    | 14.84 | 2.64 | 0 | 0.016 | 0.162 | 14 | 2 | 2 | 1 | 47.5 | 2 | 1 | 8.93  | 5.52 | 2 | 1 | 4.47 | 0.83 | 3 | n/a  | n/a  | n/a |
| Hyp2953 | 22.57 | 8.08  | 0   | 0.003 | n/a   | 17   | 16.24 | 4.29 | 0 | 0.009 | n/a   | 10 | 2 | 2 | 1 | 53.8 | 2 | 1 | 8.87  | 4.36 | 2 | 1 | 2.85 | 0.78 | 1 | n/a  | n/a  | n/a |
| Hyp2954 | 17.16 | 7.45  | 1   | 0     | 0.047 | 3    | 10.39 | 3.29 | 1 | 0     | 0.093 | 5  | 2 | 2 | 1 | 47.5 | 2 | 1 | 11.85 | 5.59 | 2 | 3 | 5.41 | 1.04 | 2 | 8.41 | 4.20 | 3   |
| Hyp2972 | 14.21 | 5.51  | 0   | 0.008 | 0.045 | 14.5 | 10.17 | 3.76 | 0 | 0.008 | 0.033 | 26 | 2 | 2 | 1 | 45.5 | 2 | 1 | 9.63  | 5.44 | 2 | 1 | 4.44 | 1.00 | 3 | n/a  | n/a  | n/a |
| Hyp2973 | 13.72 | 5.64  | 0   | 0.003 | 0.050 | 17   | 9.59  | 3.55 | 0 | 0.009 | 0.065 | 20 | 2 | 2 | 1 | 47.0 | 2 | 1 | 8.64  | 4.50 | 2 | 3 | 4.15 | 0.90 | 3 | 6.31 | 2.93 | 1   |
| Hyp2974 | 15.37 | 4.51  | 0   | 0.014 | 0.092 | 21.5 | 9.32  | 2.92 | 1 | 0     | 0.070 | 7  | 2 | 2 | 1 | n/a  | 2 | 1 | 9.93  | 5.05 | 2 | 3 | 4.40 | 0.78 | 3 | n/a  | n/a  | n/a |
| Hyp2976 | 10.86 | 4.26  | 0   | 0.008 | 0.059 | 8.5  | 8.79  | 3.37 | 0 | 0.011 | 0.129 | 20 | 2 | 2 | 1 | n/a  | 2 | 1 | 7.64  | 4.45 | 2 | 1 | 4.07 | 0.75 | 3 | n/a  | n/a  | n/a |
| Hyp2977 | 16.93 | 5.14  | 0   | 0.015 | 0.110 | 11   | 11.97 | 4.02 | 0 | 0.013 | 0.132 | 18 | 2 | 2 | 1 | 33.6 | 2 | 1 | 9.62  | 5.60 | 2 | 1 | 4.45 | 0.81 | 2 | n/a  | n/a  | n/a |
| Hyp2978 | 19.90 | 5.84  | 0   | 0.004 | 0.079 | 9    | 10.97 | 4.63 | 1 | 0     | 0.075 | 13 | 2 | 2 | 1 | 33.3 | 2 | 4 | 10.30 | 5.53 | 2 | 1 | 5.28 | 0.80 | 2 | n/a  | n/a  | n/a |
| Hyp2979 | 15.74 | 6.20  | n/a | 0.006 | n/a   | 32.5 | 10.76 | 4.01 | 0 | 0.007 | 0.081 | 17 | 2 | 2 | 1 | 25.0 | 3 | 1 | 8.16  | 4.45 | 2 | 3 | 4.09 | 0.78 | 3 | n/a  | n/a  | n/a |
| Hyp2980 | 16.57 | 7.33  | 0   | 0.010 | 0.051 | 8.5  | 9.64  | 4.20 | 1 | 0     | 0.094 | 11 | 2 | 2 | 1 | n/a  | 2 | 1 | 8.03  | 4.95 | 2 | 3 | 5.83 | 1.10 | 3 | n/a  | n/a  | n/a |
| Hyp2982 | 23.58 | 6.89  | 0   | 0.062 | 0.134 | 12   | 14.26 | 3.52 | 0 | 0.076 | 0.184 | 13 | 2 | 2 | 1 | n/a  | 3 | 1 | 10.61 | 5.25 | 2 | 1 | 5.29 | 0.70 | 2 | 5.68 | 3.76 | 2   |
| Hyp2983 | 12.12 | 5.45  | 0   | 0.015 | 0.049 | 13.5 | 8.86  | 3.41 | 0 | 0.011 | 0.126 | 24 | 2 | 2 | 1 | 31.5 | 3 | 1 | 8.71  | 5.05 | 2 | 1 | 4.51 | 0.81 | 3 | n/a  | n/a  | n/a |
| Hyp2984 | 16.30 | 7.88  | 0   | 0.001 | 0.052 | 10.5 | 10.50 | 5.21 | 1 | 0     | 0.099 | 10 | 2 | 2 | 1 | n/a  | 3 | 1 | 10.22 | 5.66 | 2 | 1 | 4.81 | 0.91 | 1 | n/a  | n/a  | n/a |
| Hyp2985 | 13.50 | 7.39  | 0   | 0.016 | 0.084 | 10.5 | 8.00  | 2.21 | 1 | 0     | 0.126 | 16 | 2 | 2 | 1 | n/a  | 3 | 1 | 9.39  | 5.16 | 2 | 1 | 5.45 | 1.07 | 1 | n/a  | n/a  | n/a |
| Hyp2991 | 22.81 | 9.87  | 0   | 0.001 | 0.034 | 6.5  | 14.58 | 6.25 | 0 | 0.003 | 0.049 | 20 | 2 | 2 | 1 | 47.0 | 3 | 1 | 9.72  | 4.99 | 2 | 1 | 5.73 | 1.04 | 1 | n/a  | n/a  | n/a |
| Hyp2993 | 21.78 | 9.62  | 0   | 0.005 | 0.044 | 6    | 10.68 | 4.27 | 1 | 0     | 0.105 | 12 | 2 | 2 | 1 | 41.5 | 2 | 1 | 11.09 | 5.76 | 2 | 3 | 5.23 | 0.93 | 2 | n/a  | n/a  | n/a |
| Hyp2994 | 11.97 | 5.02  | 0   | 0.006 | 0.090 | 22.5 | 8.23  | 3.17 | 1 | 0     | 0.061 | 14 | 2 | 2 | 1 | 51.5 | 3 | 1 | 11.61 | 5.58 | 2 | 1 | 5.85 | 1.10 | 1 | n/a  | n/a  | n/a |
| Hyp2995 | 14.71 | 5.40  | 0   | 0.004 | 0.065 | 18.5 | 9.69  | 3.05 | 1 | 0     | 0.065 | 13 | 2 | 2 | 1 | 47.3 | 3 | 1 | 11.31 | 5.35 | 2 | 3 | 5.16 | 0.86 | 1 | n/a  | n/a  | n/a |
| Hyp2996 | 22.97 | 9.38  | 0   | 0.002 | 0.011 | 8.5  | 13.25 | 4.81 | 0 | 0.005 | 0.050 | 11 | 2 | 2 | 1 | 48.8 | 3 | 1 | 12.71 | 5.53 | 2 | 1 | 6.13 | 1.07 | 2 | n/a  | n/a  | n/a |
| Hyp2997 | 18.21 | 7.59  | 0   | 0.006 | 0.062 | 10.5 | 10.68 | 3.65 | 1 | 0     | 0.114 | 20 | 2 | 2 | 1 | 50.8 | 3 | 1 | 12.34 | 5.79 | 2 | 1 | 5.77 | 1.10 | 1 | n/a  | n/a  | n/a |
| Hyp2998 | 19.79 | 8.90  | 0   | 0.005 | 0.054 | 9    | 16.72 | 6.62 | 0 | 0.003 | 0.026 | 9  | 2 | 2 | 1 | 50.5 | 2 | 1 | 13.51 | 5.97 | 2 | 1 | 5.91 | 1.02 | 1 | n/a  | n/a  | n/a |
| Hyp2999 | 13.64 | 5.80  | 0   | 0.012 | 0.090 | 15   | 6.95  | 2.95 | 1 | 0     | 0.016 | 22 | 2 | 2 | 1 | 52.3 | 2 | 1 | 11.37 | 5.21 | 2 | 3 | 5.10 | 0.96 | 1 | n/a  | n/a  | n/a |
| Hyp3560 | 19.16 | 9.36  | 0   | 0.002 | 0.044 | 8    | 14.48 | 5.67 | 1 | 0     | 0.074 | 9  | 2 | 2 | 1 | 50.7 | 2 | 1 | 10.61 | 5.56 | 2 | 1 | 4.48 | 0.90 | 1 | n/a  | n/a  | n/a |
| Hyp3561 | 20.31 | 8.60  | 0   | 0.003 | 0.058 | 6.5  | 12.48 | 4.73 | 0 | 0.005 | 0.102 | 9  | 2 | 2 | 1 | 48.3 | 2 | 1 | 11.19 | 5.86 | 2 | 1 | 4.62 | 0.99 | 1 | 6.19 | 3.91 | 1   |
| Hyp3562 | 21.66 | 8.68  | 0   | 0.028 | 0.043 | 2    | 10.83 | 3.50 | 0 | 0.109 | 0.311 | 2  | 2 | 2 | 1 | 48.3 | 3 | 2 | 12.23 | 6.18 | 2 | 2 | 5.76 | 1.15 | 2 | 5.28 | 3.71 | 1   |
| Hyp3563 | 26.32 | 14.91 | 0   | 0.003 | n/a   | 3.5  | 12.94 | 5.70 | 0 | 0.026 | 0.104 | 4  | 2 | 2 | 1 | 49.5 | 2 | 2 | 12.78 | 6.49 | 2 | 1 | 5.07 | 1.23 | 1 | 7.04 | 4.63 | 3   |
| Hyp3564 | 24.14 | 10.00 | 0   | 0.025 | 0.074 | 1.5  | 8.85  | 2.98 | 0 | 0.012 | 0.169 | 1  | 2 | 2 | 1 | n/a  | 3 | 2 | 13.08 | 6.28 | 2 | 2 | 4.69 | 1.20 | 1 | n/a  | n/a  | n/a |
| Hyp3565 | 31.56 | 13.38 | 0   | 0.001 | n/a   | 1    | 14.22 | 5.28 | 0 | 0.059 | 0.191 | 3  | 2 | 2 | 1 | 55.5 | 3 | 2 | 12.47 | 5.77 | 2 | 2 | 5.43 | 1.00 | 2 | n/a  | n/a  | n/a |
| Hyp3566 | 19.37 | 8.57  | 0   | 0.053 | 0.126 | 1    | 10.75 | 3.42 | 0 | 0.078 | n/a   | 3  | 2 | 2 | 1 | n/a  | 3 | 2 | 12.53 | 6.39 | 2 | 2 | 4.88 | 1.22 | 1 | n/a  | n/a  | n/a |
| Hyp3567 | 14.33 | 5.71  | 0   | 0.008 | 0.085 | 7    | 9.18  | 4.18 | 1 | 0     | 0.008 | 6  | 2 | 2 | 1 | 50.5 | 3 | 2 | 11.94 | 5.83 | 2 | 1 | 6.23 | 1.42 | 1 | n/a  | n/a  | n/a |
| Hyp3569 | 11.75 | 4.20  | 0   | 0.015 | 0.106 | 5    | 10.36 | 2.38 | 0 | 0.026 | 0.116 | 9  | 2 | 2 | 1 | n/a  | 3 | 1 | 10.97 | 5.44 | 2 | 3 | 5.91 | 0.94 | 1 | n/a  | n/a  | n/a |
| Hyp3570 | 13.54 | 5.06  | 0   | 0.016 | 0.114 | 7    | 8.98  | 2.34 | 1 | 0     | 0.061 | 8  | 2 | 2 | 1 | n/a  | 2 | 1 | 11.84 | 5.32 | 2 | 1 | 5.32 | 0.92 | 1 | n/a  | n/a  | n/a |
| Hyp3571 | 10.73 | 3.75  | 0   | 0.024 | 0.206 | 10   | 7.30  | 2.11 | 1 | 0     | 0.186 | 12 | 2 | 2 | 1 | n/a  | 2 | 2 | 11.23 | 5.83 | 2 | 1 | 4.28 | 1.11 | 1 | n/a  | n/a  | n/a |
| Hyp3572 | 16.42 | 6.09  | 0   | 0.005 | 0.099 | 4.5  | 8.44  | 2.71 | 1 | 0     | 0.125 | 14 | 2 | 2 | 1 | n/a  | 3 | 2 | 12.87 | 4.68 | 2 | 1 | 6.02 | 1.08 | 1 | n/a  | n/a  | n/a |
| Hyp3573 | 15.97 | 6.92  | 0   | 0.007 | 0.086 | 13   | 9.40  | 3.71 | 0 | 0.018 | 0.137 | 8  | 2 | 2 | 1 | n/a  | 2 | 1 | 10.96 | 5.66 | 2 | 1 | 5.74 | 1.07 | 2 | n/a  | n/a  | n/a |

|         |       |       |   |       |       |      |       |      |   |       |       |    |   |   |   |      |   |   |       |      |   |   |       |      |   |      |      |     |
|---------|-------|-------|---|-------|-------|------|-------|------|---|-------|-------|----|---|---|---|------|---|---|-------|------|---|---|-------|------|---|------|------|-----|
| Hyp3575 | 10.64 | 3.15  | 0 | 0.007 | 0.107 | 5    | 4.51  | 1.61 | 1 | 0     | 0.175 | 14 | 2 | 2 | 0 | n/a  | 3 | 2 | 7.37  | 5.01 | 2 | 3 | 3.27  | 0.96 | 4 | n/a  | n/a  | n/a |
| Hyp3576 | 17.94 | 9.69  | 0 | 0.007 | 0.055 | 2    | 11.45 | 5.34 | 1 | 0     | 0.094 | 7  | 2 | 2 | 1 | n/a  | 3 | 2 | 10.37 | 5.64 | 2 | 1 | 5.85  | 1.31 | 1 | n/a  | n/a  | n/a |
| Hyp3577 | 12.43 | 3.90  | 1 | 0     | 0.102 | 11.5 | 6.98  | 2.14 | 1 | 0     | 0.149 | 20 | 2 | 2 | 1 | 47.0 | 2 | 1 | 11.09 | 5.81 | 2 | 3 | 5.53  | 1.03 | 2 | n/a  | n/a  | n/a |
| Hyp3794 | 11.33 | 3.62  | 0 | 0.003 | 0.068 | 4.5  | 8.38  | 3.39 | 1 | 0     | 0.034 | 9  | 2 | 2 | 1 | 52.0 | 2 | 4 | 12.49 | 4.69 | 2 | 1 | 4.67  | 0.95 | 1 | 6.24 | 3.39 | 1   |
| Hyp4002 | 25.17 | 8.53  | 0 | 0.009 | 0.017 | 3    | 14.86 | 4.00 | 1 | 0     | 0.064 | 6  | 2 | 2 | 1 | n/a  | 2 | 4 | 13.52 | 6.41 | 2 | 1 | 9.22  | 1.30 | 2 | n/a  | n/a  | n/a |
| Hyp4003 | 23.21 | 12.29 | 1 | 0     | 0.018 | 6.5  | 15.16 | 6.96 | 1 | 0     | 0.060 | 4  | 2 | 2 | 1 | n/a  | 2 | 1 | 12.27 | 6.64 | 2 | 1 | 7.09  | 1.41 | 1 | n/a  | n/a  | n/a |
| Hyp4004 | 25.30 | 10.58 | 0 | 0.005 | 0.025 | 3.5  | 14.86 | 3.72 | 0 | 0.006 | 0.121 | 3  | 2 | 2 | 1 | n/a  | 2 | 2 | 14.89 | 6.09 | 2 | 1 | 8.55  | 1.24 | 2 | n/a  | n/a  | n/a |
| Hyp4005 | 24.10 | 6.43  | 0 | 0.010 | 0.039 | 3    | 13.20 | 2.83 | 0 | 0.034 | 0.213 | 4  | 2 | 2 | 1 | n/a  | 2 | 2 | 15.47 | 7.99 | 2 | 1 | 10.59 | 1.15 | 2 | n/a  | n/a  | n/a |
| Hyp4006 | 29.84 | 11.39 | 0 | 0.001 | 0.023 | 2    | 18.73 | 5.58 | 1 | 0     | n/a   | 4  | 2 | 2 | 1 | 43.5 | 2 | 2 | 13.85 | 6.99 | 2 | 1 | 9.09  | 1.39 | 2 | n/a  | n/a  | n/a |
| Hyp4007 | 28.26 | 10.43 | 0 | 0.004 | 0.032 | 2.5  | 20.54 | 5.63 | 0 | 0.008 | 0.044 | 3  | 2 | 2 | 1 | n/a  | 2 | 2 | 14.91 | 6.16 | 2 | 1 | 8.95  | 1.33 | 2 | n/a  | n/a  | n/a |
| Hyp4008 | 23.27 | 6.39  | 0 | 0.007 | 0.026 | 4    | 16.52 | 3.82 | 0 | 0.020 | 0.101 | 4  | 2 | 2 | 1 | 48.0 | 2 | 2 | 14.30 | 6.50 | 2 | 1 | 10.06 | 1.45 | 2 | n/a  | n/a  | n/a |
| Hyp4009 | 20.79 | 10.58 | 1 | 0     | 0.030 | 5    | 13.67 | 5.14 | 1 | 0     | 0.091 | 5  | 2 | 2 | 1 | 32.3 | 2 | 1 | 11.86 | 5.70 | 2 | 1 | 7.16  | 1.29 | 1 | n/a  | n/a  | n/a |
| Hyp4010 | 30.25 | 8.99  | 0 | 0.002 | 0.011 | 3.5  | 20.98 | 4.79 | 0 | 0.016 | 0.070 | 6  | 2 | 2 | 1 | 46.0 | 2 | 2 | 15.01 | 6.86 | 2 | 1 | 10.91 | 1.34 | 2 | n/a  | n/a  | n/a |
| Hyp4011 | 19.22 | 6.19  | 1 | 0     | 0.034 | 3    | 13.79 | 3.33 | 0 | 0.007 | 0.083 | 3  | 2 | 2 | 1 | 51.0 | 2 | 1 | 12.32 | 4.71 | 2 | 1 | 4.61  | 1.02 | 1 | n/a  | n/a  | n/a |
| Hyp4012 | 15.99 | 5.11  | 0 | 0.006 | n/a   | 7    | 11.70 | 2.86 | 0 | 0.010 | n/a   | 5  | 2 | 2 | 1 | 46.0 | 2 | 4 | 14.26 | 5.34 | 2 | 1 | 5.57  | 1.28 | 2 | n/a  | n/a  | n/a |
| Hyp4013 | 15.79 | 3.45  | 0 | 0.008 | n/a   | 1    | 9.75  | 2.08 | 1 | 0     | n/a   | 7  | 2 | 2 | 1 | 38.0 | 2 | 1 | 10.97 | 4.54 | 2 | 3 | 5.48  | 0.66 | 2 | n/a  | n/a  | n/a |
| Hyp4014 | 16.05 | 4.46  | 0 | 0.005 | n/a   | 5    | 8.89  | 2.35 | 1 | 0     | n/a   | 14 | 2 | 2 | 1 | 45.0 | 2 | 1 | 12.10 | 4.56 | 2 | 1 | 4.26  | 0.78 | 2 | n/a  | n/a  | n/a |
| Hyp4015 | 12.99 | 3.31  | 0 | 0.003 | n/a   | 3.5  | 8.96  | 1.61 | 1 | 0     | n/a   | 1  | 2 | 2 | 1 | 44.4 | 2 | 1 | 12.35 | 4.80 | 2 | 3 | 5.42  | 0.72 | 2 | n/a  | n/a  | n/a |
| Hyp4016 | 15.06 | 3.23  | 0 | 0.004 | n/a   | 3    | 8.87  | 1.61 | 0 | 0.022 | n/a   | 3  | 2 | 2 | 1 | 35.8 | 2 | 1 | 11.18 | 4.64 | 2 | 3 | 5.15  | 0.62 | 2 | n/a  | n/a  | n/a |
| Hyp4017 | 17.57 | 3.96  | 1 | 0     | 0.080 | 2.5  | 10.77 | 2.12 | 1 | 0     | 0.167 | 1  | 2 | 2 | 1 | 54.0 | 2 | 1 | 11.64 | 5.01 | 2 | 1 | 5.80  | 0.88 | 2 | n/a  | n/a  | n/a |
| Hyp4018 | 13.82 | 4.04  | 1 | 0     | 0.082 | 1.5  | 7.30  | 2.03 | 0 | 0     | n/a   | 2  | 2 | 2 | 1 | n/a  | 2 | 1 | 12.73 | 4.53 | 2 | 3 | 5.24  | 1.01 | 1 | n/a  | n/a  | n/a |
| Hyp4019 | 13.53 | 2.90  | 1 | 0     | 0.118 | 1    | 7.31  | 1.56 | 1 | 0     | 0.223 | 3  | 2 | 2 | 1 | n/a  | 2 | 1 | 12.94 | 4.92 | 2 | 3 | 5.16  | 0.77 | 1 | n/a  | n/a  | n/a |
| Hyp4020 | 20.73 | 4.94  | 1 | 0     | 0.075 | 1    | 13.99 | 3.34 | 1 | 0     | 0.116 | 3  | 2 | 2 | 1 | 47.5 | 2 | 1 | 14.67 | 4.73 | 2 | 1 | 6.34  | 0.84 | 1 | n/a  | n/a  | n/a |
| Hyp4021 | 14.67 | 3.66  | 1 | 0     | 0.085 | 6    | 11.26 | 2.40 | 1 | 0     | 0.035 | 6  | 2 | 2 | 1 | n/a  | 2 | 2 | 12.62 | 6.47 | 2 | 1 | 5.80  | 1.09 | 4 | n/a  | n/a  | n/a |
| Hyp4022 | 13.22 | 3.94  | 1 | 0     | 0.064 | 7    | 8.69  | 1.94 | 1 | 0     | 0.132 | 15 | 2 | 2 | 1 | n/a  | 2 | 2 | 12.60 | 6.21 | 2 | 1 | 5.72  | 1.11 | 4 | n/a  | n/a  | n/a |
| Hyp4023 | 15.65 | 4.74  | 1 | 0     | 0.041 | 9.5  | 11.89 | 2.85 | 1 | 0     | 0.066 | 6  | 2 | 2 | 1 | 50.0 | 2 | 4 | 13.77 | 6.60 | 2 | 1 | 5.58  | 1.22 | 2 | n/a  | n/a  | n/a |
| Hyp4024 | 15.79 | 4.81  | 0 | 0.002 | 0.048 | 9.5  | 7.96  | 1.66 | 1 | 0     | 0.072 | 15 | 2 | 2 | 1 | 43.8 | 2 | 2 | 12.87 | 5.99 | 2 | 1 | 6.40  | 1.10 | 2 | n/a  | n/a  | n/a |
| Hyp4025 | 18.23 | 4.96  | 1 | 0     | 0.046 | 9.5  | 13.04 | 2.69 | 1 | 0     | 0.100 | 6  | 2 | 2 | 1 | 57.0 | 2 | 4 | 14.11 | 6.90 | 2 | 1 | 6.41  | 1.19 | 2 | n/a  | n/a  | n/a |
| Hyp4026 | 15.83 | 4.16  | 1 | 0     | 0.063 | 18   | 10.89 | 2.69 | 1 | 0     | 0.109 | 10 | 2 | 2 | 1 | 52.5 | 2 | 2 | 12.90 | 5.97 | 2 | 1 | 5.24  | 1.11 | 3 | n/a  | n/a  | n/a |
| Hyp4027 | 15.12 | 4.41  | 1 | 0     | 0.085 | 10.5 | 10.47 | 2.62 | 1 | 0     | 0.104 | 9  | 2 | 2 | 1 | 53.5 | 2 | 1 | 12.85 | 6.48 | 2 | 1 | 5.05  | 1.16 | 2 | n/a  | n/a  | n/a |
| Hyp4028 | 10.84 | 3.72  | 1 | 0     | 0.058 | 12   | 10.27 | 2.75 | 1 | 0     | 0.068 | 15 | 2 | 2 | 1 | 50.5 | 2 | 1 | 11.62 | 5.81 | 2 | 1 | 5.70  | 1.13 | 2 | n/a  | n/a  | n/a |
| Hyp4029 | 12.62 | 3.75  | 0 | 0.006 | 0.137 | 12.5 | 8.00  | 2.35 | 1 | 0     | 0.017 | 14 | 2 | 2 | 1 | n/a  | 2 | 1 | 12.22 | 5.74 | 2 | 1 | 6.54  | 1.15 | 3 | n/a  | n/a  | n/a |
| Hyp4030 | 31.04 | 7.04  | 0 | 0.003 | 0.027 | 5.5  | 21.54 | 5.03 | 0 | 0.003 | 0.035 | 7  | 2 | 2 | 1 | 47.8 | 2 | 4 | 15.26 | 6.38 | 2 | 1 | 7.26  | 1.00 | 2 | n/a  | n/a  | n/a |
| Hyp4031 | 18.39 | 6.55  | 0 | 0.009 | 0.051 | 4.5  | 15.11 | 3.16 | 0 | 0.007 | 0.053 | 3  | 2 | 2 | 1 | 54.6 | 2 | 1 | 12.87 | 6.19 | 2 | 1 | 4.74  | 1.18 | 4 | 8.11 | 2.99 | 3   |
| Hyp4032 | 15.49 | 5.22  | 0 | 0.015 | 0.099 | 4    | 7.65  | 2.25 | 1 | 0     | 0.074 | 2  | 2 | 2 | 1 | 46.0 | 2 | 1 | 11.66 | 6.17 | 2 | 1 | 5.10  | 1.05 | 4 | n/a  | n/a  | n/a |
| Hyp4033 | 13.87 | 5.45  | 1 | 0     | 0.079 | 1    | 11.11 | 2.05 | 1 | 0     | 0.056 | 3  | 2 | 2 | 1 | 51.8 | 2 | 1 | 12.07 | 6.34 | 2 | 3 | 5.18  | 1.09 | 4 | n/a  | n/a  | n/a |
| Hyp4034 | 14.13 | 4.36  | 0 | 0.003 | 0.106 | 3.5  | 10.17 | 2.54 | 1 | 0     | 0.160 | 2  | 2 | 2 | 1 | 44.8 | 2 | 1 | 12.14 | 6.05 | 2 | 1 | 5.11  | 1.11 | 4 | n/a  | n/a  | n/a |
| Hyp4035 | 11.32 | 3.08  | 1 | 0     | 0.153 | 4    | 5.90  | 1.27 | 1 | 0     | 0.170 | 4  | 2 | 2 | 1 | 48.4 | 2 | 1 | 12.41 | 5.87 | 2 | 1 | 4.77  | 1.08 | 4 | n/a  | n/a  | n/a |
| Hyp4036 | 15.57 | 3.86  | 1 | 0     | 0.097 | 10.5 | 7.57  | 1.47 | 1 | 0     | 0.029 | 6  | 2 | 2 | 1 | 54.5 | 2 | 1 | 13.59 | 6.04 | 2 | 3 | 6.55  | 1.01 | 2 | n/a  | n/a  | n/a |
| Hyp4037 | 15.42 | 3.79  | 1 | 0     | 0.047 | 10   | 10.01 | 2.23 | 1 | 0     | 0.057 | 16 | 2 | 2 | 1 | 50.6 | 2 | 1 | 13.64 | 6.19 | 2 | 3 | 6.24  | 1.07 | 2 | n/a  | n/a  | n/a |
| Hyp4038 | 14.81 | 4.27  | 0 | 0.003 | 0.112 | 1    | 8.89  | 1.63 | 1 | 0     | 0.022 | 1  | 2 | 2 | 1 | 47.0 | 2 | 1 | 12.49 | 5.91 | 2 | 1 | 4.86  | 1.05 | 4 | n/a  | n/a  | n/a |
| Hyp4039 | 15.87 | 4.56  | 0 | 0.003 | 0.099 | 14.5 | 7.60  | 2.01 | 1 | 0     | 0.083 | 11 | 2 | 2 | 1 | n/a  | 2 | 1 | 12.26 | 5.21 | 2 | 1 | 5.09  | 1.08 | 1 | n/a  | n/a  | n/a |
| Hyp4040 | 16.59 | 5.69  | 0 | 0.004 | 0.093 | 2    | 10.50 | 2.38 | 0 | 0.013 | 0.089 | 3  | 2 | 2 | 1 | 50.5 | 2 | 1 | 11.92 | 5.75 | 2 | 3 | 4.66  | 1.19 | 4 | n/a  | n/a  | n/a |
| Hyp4044 | 25.60 | 10.71 | 1 | 0     | 0.014 | 2    | 16.29 | 4.88 | 0 | 0.004 | 0.056 | 2  | 2 | 2 | 1 | 51.0 | 2 | 1 | 15.60 | 6.91 | 2 | 3 | 7.68  | 1.37 | 2 | n/a  | n/a  | n/a |
| Hyp4083 | 21.91 | 5.39  | 1 | 0     | 0.055 | 10   | 18.69 | 3.64 | 1 | 0     | 0.094 | 6  | 2 | 2 | 1 | 45.8 | 2 | 1 | 17.07 | 8.88 | 2 | 1 | 8.80  | 1.08 | 2 | n/a  | n/a  | n/a |
| Hyp4143 | 19.45 | 5.26  | 1 | 0     | 0.035 | 2.5  | 13.16 | 3.18 | 1 | 0     | 0.076 | 4  | 2 | 2 | 1 | 49.4 | 2 | 1 | 8.92  | 3.97 | 2 | 1 | 5.90  | 0.89 | 2 | 5.77 | 3.30 | 1   |

|         |       |       |   |       |       |      |       |      |   |       |       |    |   |   |   |      |   |   |       |      |   |   |      |      |   |      |      |     |
|---------|-------|-------|---|-------|-------|------|-------|------|---|-------|-------|----|---|---|---|------|---|---|-------|------|---|---|------|------|---|------|------|-----|
| Hyp4173 | 22.06 | 13.71 | 0 | 0.001 | 0.017 | 2.5  | 15.46 | 8.30 | 1 | 0     | 0.042 | 4  | 2 | 2 | 1 | 48.8 | 2 | 1 | 10.17 | 5.83 | 2 | 1 | 7.09 | 1.28 | 1 | n/a  | n/a  | n/a |
| Hyp4184 | 10.45 | 4.61  | 0 | 0.040 | 0.082 | 10.5 | 9.54  | 3.00 | 0 | 0.067 | 0.245 | 13 | 2 | 2 | 1 | 39.0 | 2 | 2 | 11.72 | 6.32 | 2 | 1 | 5.73 | 0.94 | 2 | n/a  | n/a  | n/a |
| Hyp4204 | 14.82 | 5.08  | 1 | 0     | 0.048 | 7    | 8.71  | 2.23 | 1 | 0     | 0.066 | 24 | 2 | 2 | 1 | 49.5 | 2 | 1 | 10.72 | 4.53 | 2 | 3 | 5.28 | 1.14 | 1 | n/a  | n/a  | n/a |
| Hyp4214 | 18.96 | 4.80  | 0 | 0.001 | 0.108 | 4.5  | 13.71 | 2.78 | 1 | 0     | 0.159 | 6  | 2 | 2 | 1 | 44.8 | 2 | 1 | 9.52  | 4.66 | 2 | 1 | 5.57 | 0.79 | 2 | 6.97 | 3.12 | 3   |
