# Supplementary material
Source: PubMed Central journal article supplement (PMC3662511)
Supplement: supp_mct065_mct065supp_table3.pdf [file supp_mct065_mct065supp_table3.pdf]

## SUPPLEMENTARY DATA

TABLE S3. Summary of 18 characters (a to r) used in Principle Coordinate Analysis (PCoA) and CDA (Cannonical Discriminant Analysis). Morphological characters are based on the data (characters 1 to 28) scored as summarized in Table S2. (n: number of organs analysed per individual). The data matrix follows below the list of characters.

### Leaves:            **Leafs at the stem at middle height of the plant (n = 2):**

- a) ratio of length (1) and width (2) of leafs, c
- b) density of black glands in the middle of the leaves (4), c [number per cm<sup>2</sup>]
- c) density of transparent glands (6), c [number per cm<sup>2</sup>]

### **Second leaf on side branches in the middle of the whole plant (n = 2)**

- d) ratio of length (7) and width (8) of leafs, c
- e) density of black glands in the middle of the leaves (10), c [number per cm<sup>2</sup>]
- f) density of transparent glands (12), c [number per cm<sup>2</sup>]

### Stem:

- g) number of stripes in lower (13) and upper (14) half of the plant, d (0: both = 2, 1: both = 4, 2: differing numbers)
- h) presence of black glands (15), d (1,0)
- i) angle of the primary inflorescense branches compared to the main axis (16), c

### Petals: (n = 5)

- j) presence and distribution of types of glands (17), d (1: transparent glands only, 2: transparent and black glands, 3: black glands only)
- k) black glands characters (18, combined), d (0: glands at margin only, 1: glands all over the surface and at the margins, 2 no black glands present)
- l) ratio of length (19) and width (20) of petals, c
- m) margin of petals (21), d (1: entire, 2: furrowed)

### Sepals: (n = 5)

- n) black glands characters (22), d (0: glands as dots only, 1: glands as dots and stripes, 2: no black glands present)
- o) ratio of length (23) and width (24) of sepals, c
- p) appearance of the sepal tip (25), d (0: hairlike tip without smooth transition, 1: hairlike tip with smooth transition, 2: acute, 3: hairlike tip and frayed, 4: round shaped, 5: broad and frayed)

### Capsule: (n = 5)

- q) ratio of length (26) and width (27) of capsules, c
- r) capsule type (28), d (0: "*perforatum* type", 1: "*veronense* type", 2: intermediate between 0 and 1, 3: "*maculatum* type")

Character matrix  
n/a: no data available

| <b>Character:</b> | a)    | b)    | c)   | d)    | e)    | f) | g) | h) | i)   | j) | k) | l)    | m) | n) | o)    | p) | q)    | r)  |
|-------------------|-------|-------|------|-------|-------|----|----|----|------|----|----|-------|----|----|-------|----|-------|-----|
| <b>Ind. no.</b>   |       |       |      |       |       |    |    |    |      |    |    |       |    |    |       |    |       |     |
| Hyp0057           | 2.048 | 0.041 | 2.5  | 2.988 | 0.076 | 6  | 2  | 1  | n/a  | 2  | 1  | 2.667 | 1  | 1  | 2.449 | 6  | n/a   | n/a |
| Hyp0058           | 2.158 | 0.038 | 3    | 3.175 | 0.125 | 4  | 2  | 1  | 27.5 | 2  | 1  | 2.561 | 1  | 2  | 2.553 | 6  | n/a   | n/a |
| Hyp0059           | 2.004 | 0.015 | 1    | 2.222 | 0.022 | 1  | 2  | 1  | 29.0 | 2  | 1  | 1.940 | 1  | 1  | 2.349 | 5  | n/a   | n/a |
| Hyp0075           | 1.883 | 0.021 | 10.5 | 2.654 | 0.050 | 13 | 1  | 1  | 59.0 | 2  | 1  | 2.332 | 2  | 3  | 3.428 | 2  | 1.594 | 1   |
| Hyp0076           | 2.327 | 0.026 | 7.5  | 3.084 | 0.023 | 7  | 1  | 1  | 53.7 | 2  | 1  | 2.396 | 2  | 1  | 3.528 | 2  | 1.522 | 1   |
| Hyp0077           | 2.485 | 0.011 | 7    | 2.931 | 0.023 | 8  | 1  | 1  | 51.5 | 2  | 1  | 2.332 | 2  | 3  | 3.206 | 1  | 1.524 | 1   |
| Hyp0078           | 2.671 | 0.014 | 6    | 3.251 | 0.024 | 3  | 1  | 1  | 58.5 | 3  | 1  | 2.368 | 2  | 2  | 4.473 | 2  | n/a   | n/a |
| Hyp0082           | 2.574 | 0     | 0    | 2.976 | 0     | 0  | 2  | 1  | 43.7 | 2  | 1  | 2.040 | 1  | 2  | 2.490 | 6  | 1.632 | 4   |
| Hyp0083           | 2.262 | 0     | 0    | 2.362 | 0     | 0  | 2  | 1  | 31.0 | 2  | 1  | 2.279 | 1  | 2  | 2.321 | 6  | 1.765 | 4   |
| Hyp0084           | 2.124 | 0     | 0    | 2.339 | 0     | 0  | 2  | 1  | 50.5 | 2  | 1  | 1.884 | 2  | 2  | 2.807 | 6  | 1.680 | 4   |
| Hyp0102           | 2.631 | 0     | 8.5  | 3.811 | 0     | 9  | 1  | 1  | 51.3 | 2  | 0  | 2.518 | 2  | 1  | 7.587 | 2  | n/a   | n/a |
| Hyp0103           | 3.463 | 0     | 14.5 | 3.629 | 0     | 10 | 1  | 1  | 52.0 | 2  | 0  | 2.826 | 2  | 3  | 7.394 | 2  | n/a   | n/a |
| Hyp0104           | 3.476 | 0     | 13   | 3.859 | 0     | 7  | 1  | 1  | 49.0 | 2  | 0  | 3.036 | 2  | 3  | 6.751 | 2  | n/a   | n/a |
| Hyp0105           | 3.480 | 0     | 13.5 | 3.852 | 0     | 13 | 1  | 1  | 50.5 | 2  | 0  | 3.032 | 2  | 3  | 7.002 | 2  | n/a   | n/a |
| Hyp0106           | 3.226 | 0     | 9    | 4.098 | 0     | 10 | 1  | 1  | 55.0 | 2  | 0  | 2.804 | 2  | 3  | 7.549 | 2  | n/a   | n/a |
| Hyp0108           | 3.317 | 0.025 | 6.5  | 4.453 | 0.021 | 4  | 1  | 1  | n/a  | 2  | 1  | 2.702 | 1  | 1  | 4.476 | 3  | n/a   | n/a |
| Hyp0112           | 3.390 | 0.013 | 4    | 4.253 | 0.024 | 4  | 1  | 1  | n/a  | 2  | 1  | 2.067 | 1  | 3  | 4.301 | 3  | 1.588 | 1   |
| Hyp0114           | 3.009 | 0.010 | 10   | 3.225 | 0.016 | 12 | 1  | 1  | 51.8 | 2  | 1  | 3.255 | 2  | 1  | 3.962 | 2  | 1.685 | 1   |
| Hyp0115           | 2.906 | 0.003 | 4    | 3.455 | 0     | 4  | 1  | 1  | 53.2 | 2  | 1  | 2.848 | 2  | 1  | 5.531 | 1  | 1.668 | 1   |
| Hyp0116           | 3.553 | 0     | 6.5  | 3.625 | 0     | 6  | 1  | 1  | n/a  | 2  | 0  | 3.340 | 2  | 1  | 4.392 | 1  | 1.704 | 1   |
| Hyp0119           | 2.597 | 0.008 | 6.5  | 3.295 | 0.039 | 8  | 1  | 1  | 50.5 | 2  | 0  | 3.390 | 2  | 1  | 5.480 | 1  | 1.597 | 3   |
| Hyp0120           | 3.074 | 0.018 | 10.5 | 3.500 | 0.024 | 17 | 1  | 1  | 59.0 | 2  | 0  | 2.373 | 2  | 1  | 4.441 | 1  | 1.745 | 3   |
| Hyp0136           | 2.023 | 0.008 | 4    | 2.523 | 0.016 | 4  | 1  | 1  | 47.4 | 2  | 0  | 2.100 | 2  | 1  | 4.628 | 2  | 1.388 | 1   |
| Hyp0138           | 1.855 | 0.009 | 6.5  | 2.704 | 0.006 | 5  | 1  | 1  | 47.4 | 3  | 1  | 2.253 | 1  | 2  | 2.302 | 6  | 1.291 | 4   |
| Hyp0147           | 2.169 | 0.006 | 4    | 3.095 | 0.012 | 5  | 1  | 1  | 54.8 | 2  | 1  | 1.980 | 2  | 1  | 4.954 | 2  | 1.368 | 1   |
| Hyp0150           | 2.299 | 0.010 | 3.5  | 2.609 | 0.013 | 5  | 1  | 1  | 49.5 | 2  | 1  | 2.331 | 1  | 1  | 4.415 | 1  | 1.556 | 1   |
| Hyp0152           | 2.173 | 0     | 2    | 3.313 | 0.007 | 2  | 1  | 1  | 49.2 | 2  | 0  | 1.721 | 2  | 1  | 4.368 | 1  | 1.647 | 1   |

|         |       |       |      |       |       |    |   |   |      |   |   |       |   |   |       |   |       |     |
|---------|-------|-------|------|-------|-------|----|---|---|------|---|---|-------|---|---|-------|---|-------|-----|
| Hyp0153 | 1.619 | 0     | 1    | 2.184 | 0.019 | 1  | 2 | 1 | 32.0 | 2 | 1 | 1.689 | 1 | 1 | 1.912 | 6 | 1.655 | 4   |
| Hyp0154 | 2.702 | 0     | 7.5  | 2.859 | 0.007 | 5  | 1 | 1 | 44.8 | 2 | 1 | 2.458 | 2 | 3 | 5.300 | 2 | 1.502 | 1   |
| Hyp0156 | 1.788 | 0.002 | 1.5  | 2.409 | 0.018 | 1  | 2 | 1 | 29.2 | 2 | 1 | 1.559 | 1 | 1 | 1.919 | 6 | 1.743 | 4   |
| Hyp0157 | 3.846 | 0.003 | 5    | 3.841 | 0     | 1  | 1 | 1 | 50.0 | 2 | 0 | 2.230 | 2 | 3 | 6.830 | 2 | 1.521 | 3   |
| Hyp0158 | 1.736 | 0.007 | 2    | 2.606 | 0     | 1  | 2 | 1 | 27.2 | 2 | 1 | 1.958 | 1 | 2 | 2.831 | 5 | 1.635 | 4   |
| Hyp0159 | 2.120 | 0.005 | 5    | 2.961 | 0     | 3  | 1 | 1 | 49.4 | 2 | 0 | 2.037 | 2 | 3 | 5.327 | 2 | 1.711 | 3   |
| Hyp0160 | 2.230 | 0.003 | 2    | 3.048 | 0.003 | 2  | 1 | 1 | 49.8 | 2 | 1 | 2.291 | 1 | 1 | 4.163 | 1 | 1.400 | 1   |
| Hyp0163 | 2.065 | 0     | 0    | 2.844 | 0     | 0  | 2 | 1 | 31.0 | 2 | 1 | 2.081 | 1 | 1 | 3.068 | 6 | 1.412 | 4   |
| Hyp0165 | 1.955 | 0     | 0    | 2.279 | 0.006 | 0  | 2 | 1 | 46.3 | 2 | 1 | 1.687 | 1 | 1 | 2.320 | 6 | n/a   | n/a |
| Hyp0168 | 2.040 | 0     | 2.5  | 2.401 | 0.014 | 4  | 2 | 1 | 29.3 | 2 | 1 | 1.933 | 2 | 1 | 2.367 | 6 | 1.382 | 4   |
| Hyp0169 | 1.664 | 0     | 0    | 2.259 | 0     | 0  | 2 | 1 | 27.8 | 2 | 1 | 1.912 | 1 | 1 | 1.929 | 6 | 1.693 | 4   |
| Hyp0173 | 3.507 | 0     | 10.5 | 5.315 | 0.010 | 11 | 1 | 1 | 46.6 | 2 | 0 | 2.204 | 2 | 1 | 5.694 | 1 | 2.156 | 2   |
| Hyp0178 | 1.664 | 0     | 0    | 2.370 | 0     | 0  | 2 | 1 | 43.5 | 2 | 1 | 2.138 | 1 | 2 | 2.395 | 6 | 1.690 | 4   |
| Hyp0179 | 2.400 | 0.005 | 5    | 3.632 | 0.011 | 4  | 1 | 1 | 65.2 | 2 | 1 | 2.160 | 2 | 1 | 5.219 | 2 | 1.257 | 1   |
| Hyp0181 | 2.557 | 0.015 | 8.5  | 3.070 | 0.012 | 9  | 1 | 1 | 29.5 | 2 | 0 | 2.083 | 2 | 1 | 3.829 | 1 | 1.817 | 3   |
| Hyp0184 | 1.909 | 0     | 0    | 2.503 | 0     | 0  | 2 | 1 | 26.8 | 2 | 1 | 1.937 | 1 | 1 | 2.721 | 6 | 1.546 | 4   |
| Hyp0185 | 4.091 | 0.014 | 14.5 | 4.644 | 0.042 | 6  | 1 | 1 | 51.8 | 2 | 0 | 2.088 | 2 | 3 | 7.169 | 2 | 2.413 | 2   |
| Hyp0186 | 2.115 | 0     | 0    | 2.429 | 0     | 0  | 2 | 0 | 31.2 | 2 | 1 | 2.116 | 1 | 1 | 2.723 | 6 | 1.502 | 4   |
| Hyp0187 | 2.742 | 0.013 | 9.5  | 3.667 | 0.032 | 18 | 1 | 1 | 31.4 | 2 | 0 | 1.962 | 2 | 1 | 5.535 | 2 | 2.370 | 2   |
| Hyp0193 | 2.024 | 0.004 | 1    | 2.879 | 0     | 0  | 2 | 1 | 48.0 | 3 | 1 | 2.374 | 1 | 1 | 2.316 | 6 | 2.080 | 4   |
| Hyp0198 | 3.257 | 0.023 | 4    | 4.642 | 0.060 | 7  | 1 | 1 | 35.0 | 2 | 1 | 2.229 | 2 | 2 | 7.897 | 2 | 1.887 | 3   |
| Hyp0200 | 1.618 | 0.052 | 5    | 2.302 | 0.104 | 2  | 2 | 1 | 28.3 | 2 | 1 | 1.625 | 1 | 2 | 2.579 | 6 | 1.711 | 4   |
| Hyp0201 | 1.837 | 0.011 | 2    | 2.650 | 0.023 | 2  | 2 | 1 | 31.0 | 2 | 1 | 1.828 | 1 | 2 | 2.319 | 6 | 1.709 | 4   |
| Hyp0203 | 2.118 | 0.013 | 4    | 2.778 | 0.015 | 6  | 1 | 1 | 52.6 | 2 | 1 | 2.161 | 2 | 2 | 4.666 | 1 | 1.570 | 1   |
| Hyp0204 | 3.841 | 0.002 | 11.5 | 4.632 | 0     | 11 | 1 | 1 | 49.3 | 2 | 0 | 2.580 | 2 | 1 | 5.519 | 2 | 2.221 | 3   |
| Hyp0212 | 2.672 | 0.001 | 0.5  | 3.321 | 0     | 1  | 1 | 1 | 50.6 | 2 | 0 | 2.138 | 2 | 3 | 6.320 | 2 | 2.049 | 3   |
| Hyp0213 | 3.627 | 0     | 11   | 6.195 | 0     | 3  | 1 | 1 | n/a  | 2 | 0 | 1.976 | 2 | 1 | 5.572 | 2 | 1.991 | 3   |
| Hyp0214 | 3.473 | 0.045 | 4.5  | 4.427 | 0.049 | 3  | 1 | 1 | 54.4 | 2 | 1 | 2.089 | 1 | 2 | 5.190 | 1 | 1.715 | 1   |
| Hyp0215 | 2.937 | 0.013 | 7.5  | 3.763 | 0.023 | 14 | 1 | 1 | 36.5 | 2 | 0 | 2.365 | 2 | 3 | 4.215 | 1 | 2.202 | 3   |
| Hyp0216 | 1.556 | 0.011 | 6    | 2.128 | 0.012 | 4  | 1 | 1 | 41.5 | 3 | 1 | 2.073 | 1 | 2 | 1.591 | 5 | 1.810 | 4   |
| Hyp0217 | 1.615 | 0     | 0.5  | 2.407 | 0     | 0  | 2 | 1 | n/a  | 3 | 1 | 1.957 | 1 | 2 | 2.451 | 5 | 1.467 | 4   |
| Hyp0220 | 2.171 | 0     | 0    | 3.346 | 0     | 0  | 2 | 1 | 26.0 | 2 | 1 | 1.651 | 1 | 2 | 2.193 | 6 | 1.454 | 4   |
| Hyp0221 | 1.901 | 0.013 | 1.5  | 2.127 | 0.028 | 2  | 2 | 1 | 53.7 | 2 | 1 | 1.780 | 1 | 2 | 2.429 | 6 | 1.643 | 4   |

|         |       |       |      |       |       |    |   |   |      |   |   |       |   |   |       |   |       |     |
|---------|-------|-------|------|-------|-------|----|---|---|------|---|---|-------|---|---|-------|---|-------|-----|
| Hyp0222 | 1.652 | 0     | 0    | 1.888 | 0     | 0  | 2 | 1 | 47.0 | 2 | 1 | 2.058 | 1 | 2 | 2.159 | 6 | 1.654 | 4   |
| Hyp0228 | 2.049 | 0     | 0    | 2.891 | 0.006 | 0  | 2 | 1 | 55.5 | 2 | 1 | 2.220 | 1 | 1 | 2.742 | 5 | 1.446 | 4   |
| Hyp0231 | 2.091 | 0.002 | 1    | 3.225 | 0     | 0  | 2 | 1 | 47.3 | 2 | 1 | 2.022 | 1 | 2 | 2.386 | 6 | 1.504 | 4   |
| Hyp0233 | 1.840 | 0.005 | 1    | 2.595 | 0.010 | 1  | 2 | 1 | n/a  | 2 | 1 | 1.860 | 1 | 2 | 2.002 | 5 | 1.547 | 4   |
| Hyp0236 | 1.956 | 0.012 | 1    | 2.210 | 0.014 | 1  | 1 | 1 | 60.5 | 2 | 0 | 2.819 | 2 | 2 | 3.470 | 1 | 1.646 | 1   |
| Hyp0240 | 2.156 | 0     | 0    | 2.671 | 0     | 0  | 2 | 1 | 53.3 | 2 | 1 | 2.314 | 1 | 2 | 3.110 | 6 | 1.296 | 4   |
| Hyp0244 | 2.512 | 0.004 | 2.5  | 3.501 | 0.004 | 3  | 1 | 1 | 46.3 | 2 | 0 | 2.083 | 2 | 3 | 4.537 | 2 | 1.468 | 1   |
| Hyp0255 | 1.863 | 0.008 | 1    | 2.135 | 0     | 0  | 2 | 1 | 46.5 | 2 | 1 | 1.710 | 1 | 1 | 2.017 | 6 | 1.518 | 4   |
| Hyp0257 | 2.410 | 0     | 0    | 3.223 | 0     | 0  | 2 | 1 | 50.4 | 2 | 1 | 6.836 | 1 | 2 | 3.135 | 6 | 1.515 | 4   |
| Hyp0258 | 2.344 | 0     | 0    | 2.452 | 0     | 0  | 2 | 1 | 55.3 | 2 | 1 | 2.447 | 1 | 2 | 3.211 | 5 | 1.427 | 4   |
| Hyp0261 | 2.070 | 0     | 0    | 3.073 | 0     | 0  | 2 | 1 | 41.0 | 2 | 1 | 2.012 | 1 | 2 | 2.273 | 6 | 1.902 | 4   |
| Hyp0262 | 1.753 | 0     | 6    | 2.164 | 0     | 11 | 1 | 1 | n/a  | 2 | 0 | 2.493 | 2 | 1 | 4.304 | 1 | 1.749 | 1   |
| Hyp0263 | 2.204 | 0.025 | 1    | 2.496 | 0.084 | 1  | 2 | 1 | 29.6 | 2 | 1 | 1.816 | 1 | 2 | 2.605 | 6 | 1.497 | 4   |
| Hyp0265 | 1.577 | 0.005 | 1    | 2.077 | 0.028 | 1  | 2 | 1 | n/a  | 2 | 1 | 1.742 | 1 | 2 | 1.608 | 5 | 1.569 | 4   |
| Hyp0267 | 2.013 | 0.007 | 0.5  | 2.928 | 0     | 0  | 2 | 1 | 48.2 | 2 | 1 | 2.030 | 1 | 2 | 2.402 | 6 | 1.704 | 4   |
| Hyp0269 | 2.377 | 0     | 2.5  | 3.143 | 0     | 7  | 1 | 1 | 46.0 | 2 | 0 | 2.031 | 2 | 1 | 4.201 | 2 | 1.695 | 1   |
| Hyp0271 | 2.554 | 0     | 2.5  | 3.497 | 0     | 2  | 1 | 1 | 51.8 | 2 | 0 | 2.237 | 2 | 3 | 4.569 | 1 | 1.455 | 1   |
| Hyp0275 | 1.798 | 0     | 0    | 3.707 | 0     | 0  | 2 | 1 | 29.4 | 2 | 1 | 1.905 | 1 | 2 | 2.154 | 6 | 1.793 | 4   |
| Hyp0277 | 1.614 | 0     | 0    | 2.299 | 0     | 0  | 2 | 1 | 29.4 | 3 | 1 | 1.982 | 1 | 2 | 2.493 | 6 | 1.704 | 4   |
| Hyp0278 | 2.147 | 0.013 | 4    | 2.401 | 0.010 | 1  | 2 | 1 | n/a  | 2 | 1 | 2.328 | 1 | 1 | 2.149 | 6 | 2.244 | 4   |
| Hyp0283 | 2.551 | 0.001 | 0    | 2.600 | 0.028 | 1  | 2 | 1 | 31.4 | 2 | 1 | 1.768 | 2 | 2 | 2.084 | 6 | 2.108 | 4   |
| Hyp0289 | 1.948 | 0     | 0    | 2.792 | 0     | 0  | 2 | 1 | 36.0 | 2 | 1 | 1.823 | 2 | 2 | 2.336 | 6 | 1.685 | 4   |
| Hyp0344 | 1.966 | 0.013 | 3.5  | 2.676 | 0.010 | 1  | 3 | 1 | 47.0 | 2 | 1 | 2.053 | 1 | 1 | 2.644 | 6 | n/a   | n/a |
| Hyp0345 | 1.944 | 0.007 | 4.5  | 2.258 | 0.009 | 4  | 2 | 1 | 53.0 | 2 | 1 | 1.500 | 1 | 2 | 2.444 | 6 | n/a   | n/a |
| Hyp0352 | 2.257 | 0     | 0    | 3.029 | 0     | 0  | 2 | 1 | 47.4 | 2 | 1 | 1.535 | 1 | 2 | 2.647 | 6 | n/a   | n/a |
| Hyp0354 | 1.454 | 0     | 0    | 2.246 | 0     | 0  | 2 | 1 | 48.5 | 2 | 1 | 1.849 | 1 | 1 | 2.108 | 6 | n/a   | n/a |
| Hyp0363 | 2.523 | 0.009 | 8.5  | 3.603 | 0.009 | 13 | 1 | 1 | 45.0 | 3 | 1 | 2.132 | 1 | 2 | 4.515 | 4 | n/a   | n/a |
| Hyp0364 | 2.670 | 0.011 | 10.5 | 2.517 | 0.016 | 7  | 1 | 1 | 57.5 | 3 | 1 | 1.977 | 2 | 2 | 7.161 | 2 | n/a   | n/a |
| Hyp0378 | 2.393 | 0     | 2    | 4.000 | 0.006 | 5  | 1 | 1 | 43.3 | 3 | 0 | 2.021 | 2 | 1 | 4.643 | 2 | 2.242 | 1   |
| Hyp0381 | 2.095 | 0.008 | 3.5  | 2.535 | 0.004 | 7  | 1 | 1 | 49.0 | 2 | 1 | 2.109 | 2 | 1 | 4.001 | 2 | n/a   | n/a |
| Hyp0382 | 2.483 | 0.002 | 5    | 2.686 | 0     | 3  | 1 | 1 | 45.0 | 2 | 1 | 2.406 | 2 | 1 | 3.465 | 4 | n/a   | n/a |
| Hyp0383 | 2.346 | 0.007 | 3.5  | 2.653 | 0.008 | 5  | 1 | 1 | 50.5 | 2 | 1 | 2.059 | 2 | 1 | 3.308 | 4 | n/a   | n/a |
| Hyp0385 | 3.656 | 0.002 | 8.5  | 3.864 | 0     | 11 | 1 | 1 | n/a  | 2 | 0 | 2.275 | 2 | 1 | 5.178 | 2 | n/a   | n/a |

|         |       |       |     |       |       |    |   |   |      |   |   |       |   |   |       |   |       |     |
|---------|-------|-------|-----|-------|-------|----|---|---|------|---|---|-------|---|---|-------|---|-------|-----|
| Hyp0386 | 2.398 | 0     | 5.5 | 2.483 | 0     | 8  | 1 | 1 | n/a  | 2 | 0 | 1.945 | 2 | 3 | 4.981 | 2 | n/a   | n/a |
| Hyp0388 | 1.964 | 0     | 0   | 2.522 | 0     | 0  | 2 | 1 | 28.5 | 2 | 1 | 1.989 | 1 | 2 | 2.360 | 6 | n/a   | n/a |
| Hyp0389 | 2.028 | 0.003 | 0   | 3.319 | 0     | 0  | 2 | 1 | 36.5 | 2 | 1 | 2.185 | 1 | 2 | 2.515 | 6 | n/a   | n/a |
| Hyp0391 | 4.055 | 0     | 11  | 3.750 | 0     | 6  | 1 | 1 | 52.8 | 2 | 0 | 2.290 | 2 | 3 | 6.271 | 2 | n/a   | n/a |
| Hyp0393 | 1.830 | 0.001 | 3   | 1.956 | 0     | 0  | 2 | 1 | 25.0 | 2 | 1 | 1.821 | 1 | 2 | 2.260 | 6 | n/a   | n/a |
| Hyp0394 | 1.711 | 0.014 | 2   | 2.534 | 0.040 | 2  | 2 | 1 | 48.0 | 2 | 1 | 1.892 | 1 | 2 | 1.701 | 6 | 1.405 | 4   |
| Hyp0395 | 1.876 | 0.008 | 1   | 2.987 | 0     | 0  | 2 | 1 | 51.8 | 2 | 1 | 1.894 | 1 | 2 | 1.604 | 6 | n/a   | n/a |
| Hyp0396 | 2.088 | 0.004 | 2   | 3.094 | 0.024 | 4  | 1 | 1 | 40.8 | 2 | 0 | 2.185 | 2 | 1 | 6.091 | 2 | n/a   | n/a |
| Hyp0399 | 3.273 | 0.004 | 2.5 | 4.085 | 0.007 | 7  | 1 | 1 | 50.5 | 2 | 1 | 2.003 | 2 | 1 | 4.483 | 4 | 2.102 | 1   |
| Hyp0400 | 2.036 | 0.018 | 1.5 | 2.355 | 0.043 | 1  | 1 | 0 | 29.0 | 3 | 1 | 2.194 | 2 | 2 | 4.593 | 2 | n/a   | n/a |
| Hyp0401 | 2.178 | 0.011 | 2   | 2.791 | 0.014 | 2  | 1 | 1 | 50.5 | 3 | 1 | 2.122 | 2 | 2 | 5.218 | 2 | n/a   | n/a |
| Hyp0403 | 2.163 | 0.003 | 4   | 2.671 | 0.003 | 6  | 1 | 1 | 50.3 | 2 | 0 | 2.003 | 2 | 3 | 6.273 | 2 | n/a   | n/a |
| Hyp0413 | 2.367 | 0.004 | 0.5 | 3.949 | 0.012 | 0  | 2 | 1 | 49.0 | 2 | 1 | 3.002 | 1 | 1 | 2.895 | 6 | n/a   | n/a |
| Hyp0415 | 1.754 | 0     | 0   | 3.160 | 0     | 0  | 2 | 1 | 47.6 | 2 | 1 | 2.540 | 1 | 1 | 2.955 | 6 | n/a   | n/a |
| Hyp0417 | 1.853 | 0     | 0   | 3.019 | 0     | 0  | 2 | 1 | 49.4 | 2 | 1 | 2.100 | 1 | 2 | 2.329 | 6 | n/a   | n/a |
| Hyp0429 | 2.075 | 0     | 0   | 3.314 | 0     | 0  | 2 | 1 | 42.0 | 2 | 1 | 2.327 | 1 | 2 | 2.288 | 6 | n/a   | n/a |
| Hyp0430 | 2.272 | 0     | 0   | 2.700 | 0     | 0  | 2 | 1 | 44.5 | 2 | 1 | 2.818 | 1 | 2 | 2.281 | 6 | n/a   | n/a |
| Hyp0431 | 2.124 | 0     | 0   | 4.205 | 0     | 0  | 2 | 1 | 49.0 | 2 | 1 | 1.871 | 1 | 2 | 2.217 | 6 | n/a   | n/a |
| Hyp0433 | 1.656 | 0     | 1   | 2.097 | 0.010 | 4  | 2 | 1 | n/a  | 2 | 1 | 2.483 | 1 | 3 | 1.888 | 5 | 1.489 | 4   |
| Hyp0434 | 1.532 | 0.037 | 4   | 1.555 | 0.031 | 4  | 2 | 1 | 44.2 | 2 | 1 | 1.849 | 1 | 2 | 1.725 | 6 | 1.461 | 4   |
| Hyp0435 | 1.493 | 0     | 1   | 2.080 | 0     | 0  | 3 | 1 | 45.5 | 2 | 1 | 1.607 | 1 | 1 | 2.193 | 6 | 1.649 | 1   |
| Hyp0493 | 2.282 | 0.003 | 6.5 | 2.673 | 0     | 4  | 1 | 1 | n/a  | 2 | 0 | 1.752 | 2 | 2 | 4.178 | 4 | 1.632 | 1   |
| Hyp0494 | 2.201 | 0.002 | 5.5 | 2.708 | 0     | 4  | 1 | 1 | n/a  | 2 | 0 | 1.649 | 2 | 1 | 3.497 | 4 | 1.748 | 1   |
| Hyp0495 | 2.221 | 0.002 | 8   | 3.548 | 0     | 9  | 1 | 1 | n/a  | 2 | 0 | 1.717 | 2 | 1 | 3.713 | 4 | 1.518 | 1   |
| Hyp0498 | 3.399 | 0     | 12  | 4.881 | 0     | 8  | 1 | 1 | 45.0 | 2 | 0 | 3.006 | 2 | 3 | 6.159 | 2 | 1.631 | 1   |
| Hyp0499 | 4.069 | 0.002 | 12  | 4.926 | 0     | 14 | 1 | 1 | 52.0 | 2 | 0 | 2.158 | 2 | 3 | 5.493 | 2 | 1.807 | 3   |
| Hyp0500 | 3.425 | 0     | 7   | 4.119 | 0     | 4  | 1 | 1 | 56.0 | 2 | 0 | 2.237 | 2 | 3 | 6.362 | 2 | 1.653 | 1   |
| Hyp0501 | 3.538 | 0     | 4   | 4.087 | 0     | 5  | 1 | 1 | 52.5 | 2 | 0 | 2.749 | 2 | 3 | 6.524 | 2 | n/a   | n/a |
| Hyp0502 | 3.867 | 0     | 9   | 5.047 | 0.012 | 10 | 1 | 1 | 50.6 | 2 | 0 | 2.250 | 2 | 3 | 4.398 | 1 | 1.674 | 1   |
| Hyp0508 | 2.179 | 0.009 | 3.5 | 2.959 | 0.009 | 6  | 1 | 1 | 50.0 | 2 | 1 | 2.172 | 2 | 2 | 4.506 | 1 | 1.673 | 1   |
| Hyp0509 | 2.881 | 0.001 | 6   | 5.079 | 0     | 7  | 1 | 1 | 39.0 | 2 | 0 | 1.844 | 2 | 3 | 3.744 | 2 | 2.158 | 1   |
| Hyp0510 | 2.529 | 0.003 | 6   | 3.548 | 0     | 4  | 1 | 1 | 48.3 | 2 | 0 | 1.859 | 2 | 3 | 3.253 | 1 | 2.135 | 1   |
| Hyp0513 | 2.048 | 0.002 | 3.5 | 2.621 | 0     | 5  | 1 | 1 | 44.0 | 2 | 0 | 1.828 | 2 | 1 | 3.222 | 1 | 1.616 | 1   |

|         |       |       |      |       |       |    |   |   |      |   |   |       |   |   |       |   |       |     |
|---------|-------|-------|------|-------|-------|----|---|---|------|---|---|-------|---|---|-------|---|-------|-----|
| Hyp0514 | 2.381 | 0     | 5.5  | 3.873 | 0.008 | 5  | 1 | 1 | n/a  | 2 | 0 | 2.190 | 2 | 1 | 3.161 | 3 | n/a   | n/a |
| Hyp0515 | 2.073 | 0     | 2.5  | 3.333 | 0     | 4  | 1 | 1 | 52.0 | 2 | 0 | 1.823 | 2 | 1 | 3.747 | 1 | 1.804 | 1   |
| Hyp0528 | 2.138 | 0.001 | 5.5  | 3.390 | 0     | 3  | 1 | 1 | 44.3 | 2 | 0 | 2.172 | 2 | 3 | 4.742 | 2 | 1.570 | 1   |
| Hyp0529 | 2.967 | 0.003 | 8.5  | 3.618 | 0     | 5  | 1 | 1 | 39.0 | 2 | 0 | 2.118 | 2 | 3 | 4.650 | 2 | 1.555 | 1   |
| Hyp0530 | 2.392 | 0.006 | 5    | 3.155 | 0     | 5  | 1 | 1 | 46.0 | 2 | 0 | 2.101 | 2 | 2 | 3.041 | 4 | 1.463 | 1   |
| Hyp0533 | 2.714 | 0.007 | 10.5 | 3.517 | 0     | 5  | 1 | 1 | 54.5 | 2 | 1 | 2.363 | 2 | 1 | 5.441 | 1 | 1.824 | 1   |
| Hyp0534 | 2.567 | 0.006 | 6.5  | 3.394 | 0     | 5  | 1 | 1 | 49.7 | 2 | 1 | 1.703 | 2 | 1 | 3.567 | 2 | 1.726 | 1   |
| Hyp0535 | 2.401 | 0.008 | 6.5  | 3.088 | 0.016 | 3  | 1 | 1 | 45.0 | 2 | 1 | 1.970 | 2 | 1 | 4.131 | 2 | 1.581 | 1   |
| Hyp0600 | 1.748 | 0.007 | 0.5  | 2.741 | 0     | 1  | 2 | 1 | 29.3 | 2 | 1 | 1.640 | 1 | 2 | 1.844 | 6 | 1.231 | 4   |
| Hyp0601 | 2.087 | 0     | 0    | 2.954 | 0     | 0  | 2 | 1 | 31.5 | 2 | 1 | 1.551 | 1 | 2 | 2.211 | 6 | 1.709 | 4   |
| Hyp0604 | 2.163 | 0.006 | 4    | 2.916 | 0.013 | 4  | 1 | 1 | 50.4 | 2 | 1 | 2.090 | 2 | 2 | 4.558 | 4 | 1.549 | 1   |
| Hyp0605 | 2.443 | 0.002 | 3    | 3.312 | 0     | 4  | 1 | 1 | 47.6 | 2 | 1 | 2.349 | 2 | 3 | 4.952 | 4 | 1.578 | 1   |
| Hyp0646 | 2.593 | 0.006 | 7    | 3.238 | 0.016 | 6  | 1 | 1 | 53.6 | 2 | 1 | 2.133 | 2 | 2 | 4.444 | 4 | 1.425 | 1   |
| Hyp0651 | 2.991 | 0.012 | 6.5  | 3.039 | 0.015 | 9  | 1 | 1 | 47.5 | 2 | 0 | 2.062 | 2 | 1 | 5.714 | 2 | 2.632 | 2   |
| Hyp0652 | 4.659 | 0.010 | 4.5  | 5.872 | 0.018 | 4  | 1 | 1 | 35.0 | 2 | 0 | 2.017 | 2 | 1 | 5.586 | 2 | 2.231 | 2   |
| Hyp0657 | 1.930 | 0     | 1    | 2.600 | 0     | 1  | 2 | 1 | 45.8 | 2 | 1 | 2.012 | 1 | 1 | 2.434 | 6 | 1.449 | 4   |
| Hyp0658 | 1.645 | 0     | 0    | 2.277 | 0     | 0  | 2 | 1 | 47.5 | 2 | 1 | 1.740 | 1 | 1 | 2.021 | 6 | 1.362 | 4   |
| Hyp0665 | 1.861 | 0.020 | 1    | 3.207 | 0.011 | 1  | 2 | 1 | 31.3 | 2 | 1 | 1.806 | 1 | 2 | 2.045 | 6 | 1.866 | 4   |
| Hyp0666 | 2.142 | 0.013 | 1    | 2.692 | 0.046 | 0  | 2 | 1 | 42.0 | 2 | 1 | 2.201 | 1 | 2 | 2.365 | 6 | 1.672 | 4   |
| Hyp0669 | 1.804 | 0     | 1    | 2.412 | 0     | 0  | 2 | 1 | 29.8 | 2 | 1 | 1.742 | 1 | 2 | 2.379 | 6 | 1.673 | 4   |
| Hyp0670 | 1.930 | 0.003 | 0.5  | 2.500 | 0     | 0  | 2 | 1 | 40.6 | 2 | 1 | 1.894 | 1 | 2 | 2.602 | 6 | 1.694 | 4   |
| Hyp0673 | 3.877 | 0.018 | 6    | 4.533 | 0.021 | 10 | 1 | 1 | 51.3 | 2 | 0 | 2.517 | 2 | 1 | 6.761 | 2 | 1.747 | 2   |
| Hyp0674 | 4.076 | 0.012 | 8.5  | 4.456 | 0.007 | 10 | 1 | 1 | 49.8 | 2 | 0 | 2.351 | 2 | 1 | 4.630 | 3 | 1.678 | 2   |
| Hyp0677 | 1.750 | 0.015 | 3.5  | 2.691 | 0.051 | 5  | 2 | 0 | 31.3 | 2 | 1 | 1.625 | 1 | 1 | 2.109 | 6 | 2.058 | 4   |
| Hyp0678 | 2.112 | 0.011 | 6    | 2.651 | 0.101 | 6  | 2 | 1 | 29.8 | 2 | 1 | 2.122 | 1 | 1 | 2.137 | 6 | 1.678 | 4   |
| Hyp0681 | 2.788 | 0     | 9.5  | 3.568 | 0     | 4  | 1 | 0 | 57.3 | 2 | 0 | 2.016 | 2 | 1 | 5.784 | 2 | 1.837 | 3   |
| Hyp0682 | 2.341 | 0.001 | 6.5  | 3.100 | 0     | 9  | 1 | 1 | 52.5 | 2 | 0 | 2.072 | 2 | 3 | 5.607 | 1 | 1.663 | 1   |
| Hyp0685 | 2.561 | 0.001 | 4    | 2.871 | 0     | 4  | 1 | 1 | 50.0 | 2 | 1 | 2.229 | 2 | 1 | 4.114 | 1 | 1.313 | 1   |
| Hyp0686 | 2.573 | 0.004 | 1.5  | 3.192 | 0.005 | 2  | 1 | 1 | 49.0 | 2 | 1 | 2.423 | 2 | 1 | 4.185 | 1 | 1.381 | 1   |
| Hyp0697 | 1.541 | 0.016 | 3    | 2.457 | 0.054 | 5  | 2 | 1 | 34.0 | 2 | 1 | 1.657 | 1 | 1 | 1.714 | 6 | 1.266 | 4   |
| Hyp0698 | 2.051 | 0.018 | 1.5  | 3.096 | 0.049 | 1  | 2 | 1 | 49.5 | 2 | 1 | 2.021 | 1 | 1 | 1.966 | 6 | 1.196 | 4   |
| Hyp0701 | 2.090 | 0     | 2    | 2.759 | 0     | 0  | 2 | 1 | 42.5 | 2 | 1 | 1.698 | 1 | 1 | 2.154 | 6 | 1.561 | 4   |
| Hyp0702 | 1.935 | 0     | 0.5  | 2.775 | 0     | 1  | 2 | 1 | 46.0 | 2 | 1 | 2.057 | 1 | 1 | 2.004 | 6 | 1.194 | 4   |

|         |       |       |      |       |       |    |   |   |      |   |   |       |   |   |       |   |       |   |
|---------|-------|-------|------|-------|-------|----|---|---|------|---|---|-------|---|---|-------|---|-------|---|
| Hyp0714 | 2.501 | 0     | 0    | 2.826 | 0     | 0  | 2 | 1 | 53.5 | 2 | 1 | 2.663 | 1 | 2 | 2.362 | 6 | 1.870 | 4 |
| Hyp0716 | 1.779 | 0     | 0    | 2.578 | 0     | 0  | 2 | 1 | 46.0 | 2 | 1 | 1.921 | 1 | 2 | 1.657 | 6 | 1.789 | 4 |
| Hyp0725 | 3.856 | 0     | 32   | 4.241 | 0.013 | 29 | 1 | 1 | n/a  | 2 | 0 | 2.347 | 2 | 1 | 5.651 | 3 | 1.838 | 1 |
| Hyp0726 | 3.944 | 0.011 | 23.5 | 5.044 | 0.245 | 29 | 1 | 1 | 47.4 | 2 | 0 | 2.036 | 2 | 1 | 5.157 | 2 | 1.610 | 1 |
| Hyp0727 | 3.205 | 0.018 | 9    | 3.993 | 0.024 | 15 | 1 | 1 | 31.2 | 2 | 1 | 2.325 | 2 | 1 | 4.913 | 1 | 1.787 | 1 |
| Hyp0728 | 4.096 | 0.010 | 25   | 4.768 | 0     | 54 | 1 | 1 | 35.6 | 2 | 0 | 2.153 | 2 | 3 | 4.516 | 2 | 1.774 | 1 |
| Hyp0741 | 1.925 | 0     | 0    | 3.585 | 0     | 0  | 2 | 1 | 28.5 | 2 | 1 | 1.860 | 1 | 2 | 1.814 | 6 | 1.318 | 4 |
| Hyp0742 | 1.760 | 0     | 0    | 2.377 | 0     | 0  | 2 | 1 | 29.0 | 2 | 1 | 1.931 | 1 | 2 | 2.216 | 6 | 1.578 | 4 |
| Hyp0745 | 2.547 | 0.013 | 7    | 3.000 | 0.008 | 16 | 1 | 1 | 65.0 | 2 | 1 | 2.141 | 2 | 1 | 5.778 | 2 | 1.486 | 1 |
| Hyp0746 | 2.242 | 0.010 | 5.5  | 2.767 | 0.030 | 5  | 1 | 1 | 49.2 | 2 | 1 | 2.020 | 2 | 2 | 4.564 | 2 | 1.431 | 1 |
| Hyp0753 | 3.354 | 0.052 | 7    | 3.681 | 0.055 | 15 | 1 | 1 | 44.0 | 2 | 0 | 2.117 | 2 | 1 | 4.663 | 2 | 1.792 | 1 |
| Hyp0754 | 2.800 | 0.003 | 14.5 | 3.930 | 0     | 13 | 1 | 1 | 48.8 | 2 | 0 | 1.972 | 2 | 3 | 4.801 | 1 | 1.774 | 1 |
| Hyp0755 | 2.994 | 0.017 | 20   | 4.426 | 0.036 | 15 | 1 | 1 | 46.3 | 2 | 0 | 2.123 | 2 | 1 | 5.026 | 1 | 2.442 | 1 |
| Hyp0756 | 4.000 | 0.004 | 21.5 | 5.170 | 0.031 | 21 | 1 | 1 | 51.4 | 2 | 0 | 2.032 | 2 | 1 | 5.677 | 1 | 1.720 | 1 |
| Hyp0761 | 2.157 | 0     | 0    | 3.797 | 0     | 0  | 2 | 1 | 26.5 | 2 | 1 | 2.016 | 1 | 2 | 2.634 | 6 | 1.552 | 4 |
| Hyp0762 | 2.790 | 0     | 4    | 3.556 | 0     | 2  | 2 | 1 | 32.2 | 2 | 1 | 2.229 | 1 | 1 | 2.783 | 6 | 1.610 | 4 |
| Hyp0765 | 3.899 | 0.046 | 2    | 4.546 | 0.055 | 1  | 1 | 1 | 56.2 | 2 | 0 | 2.429 | 2 | 1 | 5.445 | 2 | 1.880 | 1 |
| Hyp0766 | 3.207 | 0.015 | 11.5 | 5.320 | 0.031 | 18 | 1 | 1 | 37.8 | 2 | 0 | 1.944 | 2 | 3 | 6.821 | 2 | 2.079 | 1 |
| Hyp0767 | 3.798 | 0.036 | 2.5  | 3.746 | 0.047 | 11 | 1 | 1 | 51.4 | 2 | 1 | 2.167 | 2 | 1 | 7.495 | 2 | 2.092 | 1 |
| Hyp0768 | 3.137 | 0.005 | 1    | 4.113 | 0.034 | 1  | 1 | 1 | 55.8 | 2 | 0 | 2.459 | 2 | 3 | 7.594 | 2 | 1.546 | 1 |
| Hyp0769 | 1.759 | 0     | 0    | 2.241 | 0     | 0  | 2 | 1 | 30.0 | 2 | 1 | 2.114 | 2 | 1 | 2.464 | 6 | 1.642 | 4 |
| Hyp0770 | 2.333 | 0     | 0    | 2.947 | 0     | 0  | 2 | 1 | 32.4 | 2 | 1 | 2.083 | 1 | 2 | 2.704 | 6 | 1.516 | 4 |
| Hyp0773 | 3.026 | 0.002 | 9    | 3.825 | 0.006 | 17 | 1 | 1 | 51.8 | 2 | 0 | 1.955 | 2 | 1 | 5.065 | 2 | 1.665 | 1 |
| Hyp0774 | 4.905 | 0.004 | 3    | 5.209 | 0     | 7  | 1 | 1 | 50.8 | 2 | 0 | 1.804 | 2 | 1 | 5.121 | 2 | 1.854 | 3 |
| Hyp0775 | 3.161 | 0.005 | 9.5  | 4.270 | 0.006 | 10 | 1 | 1 | 49.0 | 2 | 0 | 2.106 | 2 | 1 | 6.206 | 2 | 2.372 | 1 |
| Hyp0776 | 2.876 | 0.005 | 9.5  | 3.370 | 0.019 | 5  | 1 | 1 | 35.8 | 2 | 0 | 1.868 | 2 | 1 | 5.451 | 1 | 1.868 | 1 |
| Hyp0777 | 2.527 | 0     | 1.5  | 3.085 | 0     | 0  | 1 | 1 | 46.4 | 2 | 0 | 2.354 | 2 | 2 | 6.427 | 2 | 1.639 | 1 |
| Hyp0785 | 1.662 | 0     | 0    | 2.403 | 0     | 0  | 2 | 1 | 30.3 | 2 | 1 | 2.246 | 1 | 2 | 2.503 | 6 | 1.629 | 4 |
| Hyp0786 | 1.943 | 0     | 0    | 3.505 | 0     | 0  | 2 | 1 | 38.0 | 2 | 1 | 2.098 | 2 | 1 | 1.811 | 6 | 1.482 | 4 |
| Hyp0814 | 1.847 | 0.011 | 1    | 2.363 | 0.032 | 0  | 2 | 1 | 49.6 | 2 | 1 | 1.663 | 1 | 2 | 1.921 | 6 | 1.600 | 4 |
| Hyp0815 | 1.520 | 0     | 0    | 2.475 | 0     | 0  | 2 | 1 | 32.0 | 2 | 1 | 2.002 | 1 | 2 | 2.464 | 6 | 1.494 | 4 |
| Hyp0841 | 3.486 | 0     | 0    | 4.257 | 0.011 | 2  | 1 | 1 | 70.0 | 2 | 0 | 1.894 | 2 | 3 | 5.335 | 2 | 1.748 | 1 |
| Hyp0845 | 2.729 | 0.028 | 4    | 3.760 | 0.035 | 8  | 1 | 1 | 52.3 | 2 | 1 | 2.421 | 2 | 2 | 5.301 | 2 | 1.641 | 1 |

|         |       |       |     |       |       |    |   |   |      |   |   |       |   |   |       |   |       |   |
|---------|-------|-------|-----|-------|-------|----|---|---|------|---|---|-------|---|---|-------|---|-------|---|
| Hyp0849 | 2.448 | 0.002 | 14  | 3.291 | 0.004 | 16 | 1 | 1 | 50.6 | 2 | 0 | 1.946 | 2 | 3 | 3.189 | 2 | 1.482 | 3 |
| Hyp0850 | 2.679 | 0.021 | 16  | 3.719 | 0.022 | 16 | 1 | 1 | 51.5 | 2 | 0 | 1.792 | 2 | 1 | 5.497 | 2 | 2.077 | 3 |
| Hyp0851 | 4.291 | 0.005 | 13  | 3.992 | 0.011 | 14 | 1 | 1 | 47.2 | 2 | 1 | 2.142 | 2 | 3 | 4.504 | 3 | 1.908 | 2 |
| Hyp0852 | 3.839 | 0.007 | 10  | 3.714 | 0     | 13 | 1 | 1 | 44.0 | 2 | 0 | 2.858 | 2 | 1 | 6.253 | 2 | 2.470 | 2 |
| Hyp0857 | 1.570 | 0     | 0   | 2.472 | 0     | 0  | 2 | 1 | 27.0 | 2 | 1 | 1.757 | 1 | 2 | 2.309 | 6 | 1.883 | 4 |
| Hyp0858 | 1.757 | 0.006 | 2   | 2.961 | 0.066 | 1  | 2 | 1 | 28.5 | 2 | 1 | 1.800 | 2 | 2 | 2.430 | 6 | 1.465 | 4 |
| Hyp0870 | 1.813 | 0     | 0   | 2.620 | 0     | 0  | 2 | 1 | 28.2 | 2 | 1 | 1.924 | 2 | 2 | 2.155 | 6 | 1.418 | 4 |
| Hyp0871 | 1.753 | 0     | 0   | 2.640 | 0     | 0  | 2 | 1 | 31.7 | 2 | 1 | 1.932 | 2 | 1 | 2.389 | 6 | 1.849 | 4 |
| Hyp0872 | 2.094 | 0     | 0   | 3.024 | 0     | 0  | 2 | 1 | 31.0 | 2 | 1 | 1.988 | 1 | 2 | 2.515 | 6 | 1.707 | 4 |
| Hyp0873 | 1.961 | 0     | 0   | 2.632 | 0     | 0  | 2 | 1 | 31.7 | 2 | 1 | 2.505 | 2 | 2 | 2.203 | 6 | 1.528 | 4 |
| Hyp0874 | 1.949 | 0     | 0   | 2.689 | 0     | 0  | 2 | 1 | 32.6 | 2 | 1 | 1.999 | 1 | 2 | 2.651 | 6 | 1.692 | 4 |
| Hyp0897 | 2.352 | 0     | 0   | 2.543 | 0     | 0  | 2 | 1 | 59.0 | 2 | 1 | 2.416 | 1 | 2 | 2.951 | 6 | 1.365 | 4 |
| Hyp0898 | 2.476 | 0     | 0   | 3.636 | 0     | 0  | 2 | 1 | 56.5 | 2 | 1 | 2.762 | 1 | 3 | 2.427 | 6 | 1.348 | 4 |
| Hyp0899 | 2.303 | 0     | 0   | 3.167 | 0     | 0  | 2 | 1 | 59.8 | 2 | 0 | 2.525 | 1 | 1 | 2.285 | 6 | 1.267 | 4 |
| Hyp0900 | 2.170 | 0     | 0   | 2.349 | 0     | 1  | 2 | 1 | n/a  | 2 | 1 | 2.169 | 1 | 1 | 2.901 | 5 | 1.656 | 4 |
| Hyp0901 | 2.124 | 0     | 0   | 2.962 | 0     | 2  | 2 | 1 | 47.4 | 2 | 1 | 2.155 | 2 | 1 | 2.798 | 4 | 1.089 | 4 |
| Hyp0902 | 2.207 | 0.007 | 1   | 3.428 | 0     | 0  | 2 | 1 | 52.2 | 2 | 1 | 2.179 | 2 | 1 | 4.048 | 4 | 1.316 | 4 |
| Hyp0903 | 2.348 | 0.008 | 1   | 2.719 | 0     | 0  | 2 | 1 | 52.6 | 2 | 1 | 2.157 | 2 | 2 | 3.338 | 4 | 1.291 | 4 |
| Hyp0904 | 2.684 | 0.002 | 0.5 | 3.273 | 0     | 0  | 2 | 1 | 34.5 | 2 | 1 | 2.679 | 2 | 2 | 2.961 | 4 | 1.122 | 4 |
| Hyp0905 | 1.901 | 0.028 | 3   | 2.429 | 0.119 | 2  | 2 | 1 | n/a  | 2 | 1 | 1.795 | 1 | 1 | 2.071 | 6 | 1.638 | 4 |
| Hyp0906 | 1.971 | 0.005 | 6   | 1.996 | 0.024 | 4  | 2 | 1 | 29.0 | 2 | 1 | 2.158 | 1 | 1 | 2.130 | 5 | 1.439 | 4 |
| Hyp0913 | 2.102 | 0.002 | 3   | 2.812 | 0.006 | 1  | 2 | 1 | 46.0 | 2 | 1 | 2.163 | 1 | 2 | 2.149 | 6 | 1.433 | 4 |
| Hyp0914 | 2.390 | 0.008 | 1   | 2.971 | 0     | 0  | 2 | 1 | n/a  | 2 | 1 | 2.192 | 1 | 2 | 1.226 | 6 | 1.558 | 4 |
| Hyp0915 | 2.033 | 0     | 0   | 2.812 | 0     | 0  | 2 | 1 | 51.3 | 2 | 1 | 2.473 | 1 | 2 | 2.304 | 6 | 1.378 | 4 |
| Hyp0916 | 2.127 | 0.001 | 1.5 | 2.896 | 0     | 3  | 2 | 1 | 47.6 | 2 | 1 | 1.931 | 1 | 2 | 2.156 | 6 | 1.394 | 4 |
| Hyp0941 | 2.276 | 0     | 0   | 3.007 | 0     | 0  | 2 | 1 | 51.6 | 2 | 1 | 2.137 | 2 | 1 | 2.738 | 5 | 1.559 | 4 |
| Hyp0942 | 2.138 | 0     | 0   | 2.798 | 0     | 0  | 2 | 1 | 56.4 | 2 | 1 | 2.140 | 2 | 1 | 2.863 | 6 | 1.462 | 4 |
| Hyp0943 | 2.268 | 0.004 | 1   | 3.135 | 0     | 0  | 2 | 1 | 46.0 | 2 | 1 | 2.026 | 2 | 2 | 3.843 | 4 | 1.561 | 4 |
| Hyp0944 | 1.951 | 0     | 0   | 3.438 | 0     | 0  | 2 | 1 | 43.3 | 2 | 1 | 1.700 | 2 | 2 | 3.377 | 6 | 1.481 | 1 |
| Hyp0953 | 2.003 | 0     | 0   | 3.087 | 0     | 0  | 2 | 1 | 35.0 | 2 | 1 | 2.421 | 1 | 1 | 2.140 | 6 | 1.590 | 4 |
| Hyp0954 | 2.024 | 0     | 0   | 2.094 | 0     | 0  | 2 | 1 | 37.5 | 2 | 1 | 2.371 | 1 | 1 | 2.348 | 6 | 1.471 | 4 |
| Hyp0957 | 2.130 | 0.002 | 3   | 2.909 | 0.005 | 1  | 1 | 1 | 48.8 | 2 | 1 | 2.074 | 2 | 1 | 3.830 | 4 | 1.504 | 1 |
| Hyp0985 | 2.013 | 0.014 | 2.5 | 2.541 | 0     | 1  | 2 | 1 | 49.0 | 2 | 1 | 1.893 | 1 | 2 | 1.889 | 6 | 1.641 | 4 |



|         |       |       |      |       |       |    |   |   |      |   |   |       |   |   |       |   |       |     |
|---------|-------|-------|------|-------|-------|----|---|---|------|---|---|-------|---|---|-------|---|-------|-----|
| Hyp0986 | 1.847 | 0.020 | 3    | 2.352 | 0     | 2  | 2 | 1 | n/a  | 3 | 1 | 1.698 | 1 | 1 | 1.583 | 6 | 1.776 | 4   |
| Hyp0993 | 2.406 | 0.001 | 1    | 2.782 | 0     | 0  | 2 | 1 | 51.0 | 2 | 1 | 2.347 | 2 | 2 | 3.034 | 6 | 1.346 | 4   |
| Hyp0994 | 2.421 | 0.001 | 0    | 3.060 | 0     | 0  | 2 | 1 | 46.8 | 2 | 1 | 2.384 | 1 | 2 | 3.155 | 6 | 1.508 | 4   |
| Hyp0995 | 2.306 | 0     | 0    | 3.071 | 0     | 0  | 2 | 1 | 52.6 | 3 | 1 | 2.491 | 1 | 1 | 2.458 | 6 | 1.511 | 4   |
| Hyp0996 | 2.039 | 0     | 0    | 3.213 | 0     | 0  | 2 | 1 | 54.7 | 2 | 1 | 2.597 | 1 | 2 | 2.467 | 6 | 1.328 | 4   |
| Hyp0997 | 2.728 | 0.001 | 0    | 2.939 | 0     | 0  | 2 | 1 | 57.8 | 3 | 1 | 2.041 | 1 | 2 | 2.329 | 6 | 1.352 | 4   |
| Hyp0998 | 2.434 | 0.001 | 0    | 2.913 | 0     | 0  | 2 | 1 | 56.0 | 3 | 1 | 1.901 | 1 | 2 | 1.881 | 6 | 1.296 | 4   |
| Hyp1006 | 1.868 | 0     | 0.5  | 2.696 | 0     | 0  | 2 | 1 | 51.3 | 2 | 1 | 2.286 | 1 | 2 | 1.930 | 6 | n/a   | n/a |
| Hyp1073 | 1.652 | 0     | 0    | 2.783 | 0     | 0  | 2 | 1 | 50.3 | 2 | 1 | 2.379 | 1 | 1 | 1.557 | 5 | n/a   | 4   |
| Hyp1074 | 2.157 | 0     | 0    | 2.124 | 0     | 0  | 2 | 1 | 47.3 | 2 | 1 | 2.031 | 1 | 1 | 1.742 | 6 | n/a   | n/a |
| Hyp1080 | 1.833 | 0     | 4    | 2.282 | 0     | 3  | 2 | 1 | 30.5 | 1 | 2 | 2.203 | 1 | 3 | 2.377 | 6 | n/a   | n/a |
| Hyp1081 | 1.603 | 0     | 3.5  | 2.324 | 0     | 4  | 2 | 1 | 31.5 | 1 | 2 | 2.292 | 1 | 3 | 2.304 | 6 | n/a   | n/a |
| Hyp1094 | 1.782 | 0.001 | 3.5  | 2.512 | 0     | 2  | 2 | 1 | 39.8 | 1 | 2 | 1.969 | 1 | 3 | 1.920 | 6 | n/a   | n/a |
| Hyp1103 | 1.699 | 0     | 6.5  | 3.207 | 0     | 7  | 2 | 1 | 34.0 | 2 | 0 | 2.240 | 1 | 1 | 2.237 | 6 | n/a   | n/a |
| Hyp1111 | 2.234 | 0.002 | 0.5  | 2.737 | 0.007 | 3  | 2 | 1 | 34.4 | 2 | 1 | 2.148 | 1 | 2 | 2.971 | 6 | n/a   | n/a |
| Hyp1115 | 1.746 | 0     | 0    | 2.698 | 0.004 | 2  | 2 | 1 | 45.8 | 2 | 1 | 2.444 | 2 | 2 | 2.541 | 6 | n/a   | n/a |
| Hyp1116 | 2.244 | 0.008 | 3.5  | 2.951 | 0.027 | 7  | 2 | 1 | 50.4 | 2 | 1 | 2.234 | 2 | 2 | 3.545 | 4 | n/a   | n/a |
| Hyp1118 | 1.795 | 0.005 | 7    | 2.424 | 0.012 | 8  | 2 | 1 | 35.4 | 2 | 1 | 2.291 | 2 | 2 | 2.520 | 6 | n/a   | n/a |
| Hyp1119 | 1.938 | 0.003 | 2    | 2.559 | 0     | 0  | 2 | 1 | 50.5 | 2 | 1 | 2.226 | 2 | 2 | 2.277 | 6 | n/a   | n/a |
| Hyp1122 | 2.250 | 0     | 0    | 2.840 | 0     | 0  | 2 | 1 | 50.8 | 2 | 1 | 2.415 | 2 | 2 | 2.563 | 6 | n/a   | n/a |
| Hyp1188 | 4.211 | 0     | 17   | 5.202 | 0     | 4  | 1 | 1 | 64.6 | 2 | 0 | 2.135 | 2 | 3 | 5.762 | 2 | n/a   | n/a |
| Hyp1200 | 4.150 | 0     | 16   | 5.024 | 0     | 16 | 1 | 1 | 56.6 | 2 | 0 | 2.343 | 2 | 1 | 6.059 | 2 | n/a   | n/a |
| Hyp1224 | 2.995 | 0.005 | 13.5 | 4.514 | 0     | 36 | 1 | 1 | 39.6 | 2 | 0 | 2.584 | 2 | 3 | 4.302 | 2 | n/a   | n/a |
| Hyp1253 | 2.244 | 0.018 | 7.5  | 2.169 | 0.016 | 3  | 1 | 1 | 42.4 | 2 | 1 | 2.476 | 2 | 1 | 7.493 | 2 | n/a   | n/a |
| Hyp1259 | 2.408 | 0.011 | 9.5  | 3.695 | 0     | 12 | 1 | 1 | 57.6 | 2 | 0 | 2.451 | 2 | 3 | 5.344 | 2 | n/a   | n/a |
| Hyp1264 | 3.742 | 0.004 | 9    | 6.367 | 0     | 4  | 1 | 1 | 55.0 | 2 | 0 | 2.341 | 2 | 1 | 6.324 | 2 | n/a   | n/a |
| Hyp1305 | 1.924 | 0.011 | 3.5  | 2.338 | 0.014 | 6  | 2 | 1 | 52.5 | 2 | 1 | 2.194 | 2 | 2 | 3.589 | 4 | n/a   | n/a |
| Hyp1311 | 2.723 | 0.016 | 8    | 2.721 | 0.025 | 13 | 1 | 1 | 47.8 | 2 | 1 | 2.176 | 2 | 2 | 6.846 | 2 | n/a   | n/a |
| Hyp1316 | 2.594 | 0.007 | 11.5 | 3.205 | 0.032 | 3  | 1 | 1 | 45.8 | 2 | 0 | 1.907 | 2 | 3 | 5.928 | 2 | n/a   | n/a |
| Hyp1400 | 2.019 | 0     | 0    | 2.404 | 0     | 1  | 3 | 1 | 53.8 | 2 | 0 | 2.133 | 2 | 3 | 2.218 | 4 | 1.361 | 4   |
| Hyp1401 | 2.105 | 0.003 | 2    | 2.009 | 0.006 | 0  | 3 | 1 | 51.3 | 2 | 1 | 1.773 | 2 | 2 | 2.465 | 4 | 1.386 | 4   |
| Hyp1410 | 1.456 | 0.005 | 4    | 2.078 | 0.012 | 4  | 1 | 1 | 46.4 | 2 | 1 | 2.029 | 2 | 1 | 3.541 | 1 | 2.039 | 1   |
| Hyp1411 | 1.622 | 0     | 8.5  | 2.176 | 0     | 9  | 1 | 1 | n/a  | 2 | 0 | 2.182 | 2 | 1 | 5.212 | 1 | 1.776 | 1   |

|         |       |       |     |       |       |    |   |   |      |   |   |       |   |   |       |   |       |     |
|---------|-------|-------|-----|-------|-------|----|---|---|------|---|---|-------|---|---|-------|---|-------|-----|
| Hyp1412 | 1.550 | 0     | 2.5 | 2.053 | 0     | 5  | 1 | 1 | 33.0 | 2 | 0 | 2.159 | 2 | 1 | 3.431 | 1 | 1.879 | 1   |
| Hyp1413 | 1.956 | 0.003 | 9.5 | 2.782 | 0     | 13 | 1 | 1 | 35.6 | 2 | 1 | 2.018 | 2 | 3 | 5.171 | 4 | 2.247 | 1   |
| Hyp1414 | 1.419 | 0.007 | 13  | 1.876 | 0     | 15 | 1 | 1 | 40.0 | 2 | 0 | 2.269 | 2 | 1 | 4.181 | 3 | 1.893 | 1   |
| Hyp1415 | 2.116 | 0     | 0.5 | 2.921 | 0     | 1  | 2 | 1 | 46.0 | 2 | 1 | 2.203 | 1 | 1 | 2.174 | 6 | 1.651 | 4   |
| Hyp1416 | 1.717 | 0.008 | 1   | 2.235 | 0.017 | 3  | 2 | 1 | 33.6 | 2 | 1 | 2.124 | 1 | 2 | 2.280 | 6 | 1.436 | 4   |
| Hyp1423 | 1.529 | 0.022 | 1.5 | 2.244 | 0     | 1  | 2 | 1 | 34.2 | 2 | 1 | 1.757 | 1 | 2 | 1.974 | 6 | 1.565 | 4   |
| Hyp1424 | 1.389 | 0.008 | 3.5 | 2.279 | 0     | 3  | 2 | 1 | 28.2 | 2 | 1 | 2.060 | 1 | 2 | 1.745 | 5 | 1.311 | 4   |
| Hyp1431 | 1.922 | 0.014 | 2   | 3.215 | 0     | 4  | 2 | 1 | 29.3 | 2 | 1 | 2.036 | 2 | 2 | 1.952 | 6 | 1.716 | 4   |
| Hyp1432 | 1.620 | 0.024 | 3   | 2.824 | 0     | 2  | 2 | 1 | 26.3 | 2 | 1 | 2.004 | 1 | 2 | 2.176 | 6 | 1.502 | 4   |
| Hyp1435 | 2.402 | 0.036 | 7.5 | 3.036 | 0.025 | 8  | 1 | 1 | 49.4 | 2 | 1 | 2.091 | 2 | 2 | 4.550 | 1 | 1.653 | 1   |
| Hyp1436 | 2.437 | 0.029 | 7.5 | 3.344 | 0.016 | 8  | 1 | 1 | 50.8 | 2 | 1 | 2.235 | 2 | 2 | 4.559 | 1 | 1.622 | 1   |
| Hyp1443 | 2.343 | 0     | 6.5 | 3.332 | 0     | 8  | 1 | 1 | 58.6 | 2 | 1 | 1.805 | 2 | 3 | 4.832 | 1 | 1.515 | 1   |
| Hyp1445 | 2.328 | 0     | 4.5 | 3.580 | 0     | 7  | 1 | 1 | 57.0 | 2 | 1 | 1.946 | 2 | 1 | 4.367 | 1 | 1.428 | 1   |
| Hyp1446 | 2.369 | 0     | 4   | 3.405 | 0     | 3  | 1 | 1 | 56.0 | 2 | 1 | 1.910 | 2 | 1 | 4.936 | 1 | 1.633 | 1   |
| Hyp1459 | 1.535 | 0     | 0   | 2.278 | 0     | 0  | 2 | 1 | 31.3 | 2 | 1 | 2.174 | 1 | 2 | 2.461 | 6 | 2.151 | 4   |
| Hyp1460 | 1.704 | 0     | 0   | 1.824 | 0     | 0  | 2 | 1 | 28.5 | 2 | 1 | 1.754 | 2 | 2 | 2.165 | 6 | 2.411 | 4   |
| Hyp1463 | 2.031 | 0     | 0   | 1.745 | 0     | 0  | 2 | 1 | 31.7 | 2 | 1 | 2.103 | 2 | 2 | 2.489 | 6 | 1.888 | 4   |
| Hyp1464 | 2.423 | 0     | 0   | 2.518 | 0     | 0  | 2 | 1 | 29.5 | 3 | 1 | 1.883 | 1 | 2 | 3.090 | 6 | 1.947 | 4   |
| Hyp1471 | 1.737 | 0     | 0   | 3.152 | 0     | 0  | 2 | 1 | 47.3 | 2 | 1 | 2.108 | 1 | 1 | 2.038 | 6 | 1.615 | 4   |
| Hyp1472 | 1.969 | 0     | 0   | 2.551 | 0     | 0  | 2 | 1 | 29.2 | 2 | 1 | 2.003 | 1 | 2 | 2.195 | 6 | 1.836 | 4   |
| Hyp1503 | 1.602 | 0.003 | 3   | 2.089 | 0.002 | 3  | 2 | 1 | 45.8 | 3 | 1 | 2.128 | 1 | 2 | 2.282 | 5 | 1.310 | 4   |
| Hyp1504 | 1.870 | 0.010 | 3.5 | 2.326 | 0     | 8  | 2 | 1 | 43.5 | 3 | 1 | 2.274 | 1 | 2 | 1.977 | 5 | 1.626 | 4   |
| Hyp1505 | 2.002 | 0.020 | 4   | 2.304 | 0.020 | 6  | 2 | 1 | n/a  | 3 | 1 | 1.981 | 1 | 2 | 2.247 | 6 | 1.669 | 4   |
| Hyp1506 | 1.641 | 0.006 | 1.5 | 2.878 | 0     | 2  | 2 | 1 | 37.5 | 3 | 1 | 2.284 | 1 | 2 | 1.697 | 5 | n/a   | n/a |
| Hyp1508 | 2.934 | 0.003 | 12  | 4.042 | 0.028 | 15 | 2 | 1 | 51.0 | 2 | 1 | 2.076 | 2 | 1 | 4.300 | 4 | 1.459 | 1   |
| Hyp1515 | 2.207 | 0.006 | 4.5 | 2.967 | 0.012 | 6  | 1 | 1 | 47.0 | 2 | 0 | 2.279 | 2 | 1 | 2.935 | 2 | 1.380 | 1   |
| Hyp1516 | 2.313 | 0.008 | 10  | 3.051 | 0.015 | 12 | 3 | 1 | 45.0 | 2 | 1 | 2.142 | 1 | 1 | 2.795 | 2 | 1.579 | 1   |
| Hyp1517 | 2.373 | 0.002 | 8   | 2.647 | 0.024 | 4  | 2 | 1 | 39.5 | 3 | 1 | 1.807 | 2 | 1 | 3.648 | 2 | 1.602 | 1   |
| Hyp1518 | 2.294 | 0.004 | 4.5 | 2.528 | 0.020 | 6  | 1 | 1 | 48.3 | 2 | 1 | 2.048 | 2 | 1 | 4.832 | 4 | 1.658 | 1   |
| Hyp1548 | 1.743 | 0.028 | 2.5 | 2.858 | 0.023 | 1  | 2 | 1 | 49.3 | 2 | 1 | 2.014 | 1 | 2 | 2.227 | 5 | 1.901 | 4   |
| Hyp1567 | 1.614 | 0.010 | 6   | 2.091 | 0.037 | 3  | 2 | 1 | n/a  | 3 | 1 | 1.669 | 2 | 2 | 1.922 | 5 | 2.054 | 4   |
| Hyp1568 | 2.101 | 0.001 | 3.5 | 2.367 | 0     | 2  | 2 | 1 | 48.5 | 3 | 1 | 2.062 | 1 | 2 | 2.232 | 6 | 1.755 | 4   |
| Hyp1583 | 2.158 | 0     | 0   | 2.482 | 0     | 0  | 2 | 1 | 26.0 | 2 | 1 | 2.260 | 1 | 1 | 2.822 | 5 | 1.491 | 4   |

|         |       |       |      |       |       |    |   |   |      |   |   |       |   |   |       |   |       |     |
|---------|-------|-------|------|-------|-------|----|---|---|------|---|---|-------|---|---|-------|---|-------|-----|
| Hyp1593 | 2.776 | 0.004 | 5    | 3.905 | 0     | 6  | 3 | 1 | 52.0 | 2 | 0 | 1.854 | 2 | 1 | 6.500 | 1 | 2.152 | 1   |
| Hyp1594 | 2.383 | 0.007 | 12.5 | 2.602 | 0.005 | 8  | 3 | 1 | n/a  | 2 | 0 | 1.719 | 2 | 1 | 4.458 | 2 | 1.977 | 1   |
| Hyp1595 | 2.585 | 0.008 | 6    | 3.923 | 0.015 | 8  | 3 | 1 | 43.7 | 2 | 1 | 2.058 | 2 | 1 | 5.726 | 2 | 2.313 | 1   |
| Hyp1618 | 2.044 | 0.003 | 4    | 2.834 | 0     | 1  | 2 | 1 | 45.5 | 2 | 1 | 2.178 | 1 | 1 | 2.472 | 6 | 1.418 | 4   |
| Hyp1619 | 1.909 | 0.008 | 4    | 2.260 | 0     | 1  | 2 | 1 | 34.0 | 2 | 1 | 2.182 | 1 | 2 | 1.904 | 6 | 1.416 | 4   |
| Hyp1620 | 2.021 | 0.006 | 2    | 2.599 | 0.004 | 1  | 3 | 1 | 49.0 | 2 | 1 | 2.418 | 1 | 2 | 2.288 | 6 | 1.472 | 4   |
| Hyp1621 | 1.997 | 0     | 2    | 2.809 | 0     | 1  | 3 | 1 | 47.3 | 2 | 1 | 2.456 | 1 | 2 | 2.075 | 6 | 1.353 | 4   |
| Hyp1622 | 1.957 | 0.008 | 3    | 2.316 | 0.007 | 1  | 3 | 1 | 51.0 | 2 | 1 | 2.204 | 1 | 2 | 2.328 | 6 | 1.767 | 4   |
| Hyp1623 | 2.245 | 0     | 0    | 3.653 | 0     | 0  | 2 | 1 | 58.5 | 2 | 1 | 2.314 | 1 | 2 | 2.664 | 5 | 1.315 | 4   |
| Hyp1625 | 1.766 | 0.007 | 3.5  | 3.403 | 0     | 3  | 3 | 1 | 44.0 | 2 | 1 | 1.941 | 2 | 2 | 2.626 | 6 | 1.629 | 4   |
| Hyp1626 | 1.665 | 0.006 | 3    | 1.754 | 0     | 4  | 3 | 1 | 54.5 | 2 | 1 | 1.883 | 2 | 2 | 2.152 | 6 | 1.625 | 4   |
| Hyp1627 | 1.855 | 0     | 3    | 2.358 | 0     | 1  | 3 | 1 | 45.7 | 2 | 1 | 2.245 | 2 | 2 | 2.927 | 6 | 1.371 | 1   |
| Hyp1628 | 1.831 | 0.013 | 3.5  | 2.110 | 0.002 | 3  | 3 | 1 | 55.3 | 2 | 1 | 1.808 | 2 | 1 | 2.601 | 6 | 1.404 | 4   |
| Hyp1629 | 1.832 | 0.007 | 3.5  | 1.783 | 0.009 | 5  | 2 | 1 | 48.8 | 2 | 1 | 2.435 | 2 | 1 | 2.835 | 6 | 1.239 | 4   |
| Hyp1630 | 1.854 | 0.010 | 3    | 2.555 | 0.009 | 5  | 3 | 1 | 50.5 | 2 | 1 | 2.168 | 2 | 1 | 2.965 | 6 | 1.309 | 4   |
| Hyp1631 | 1.718 | 0     | 2    | 2.009 | 0     | 2  | 3 | 1 | 50.5 | 2 | 1 | 2.861 | 2 | 2 | 3.005 | 6 | 1.394 | 4   |
| Hyp1632 | 1.691 | 0.002 | 2    | 2.456 | 0     | 2  | 3 | 1 | 46.5 | 2 | 1 | 2.281 | 2 | 2 | 2.445 | 6 | 1.229 | 4   |
| Hyp1707 | 1.841 | 0     | 0    | 2.645 | 0     | 0  | 3 | 1 | 53.5 | 2 | 1 | 2.254 | 2 | 1 | 1.980 | 6 | 1.419 | 1   |
| Hyp1718 | 1.987 | 0     | 1.5  | 1.872 | 0     | 2  | 2 | 1 | 45.5 | 2 | 1 | 1.962 | 1 | 2 | 2.196 | 6 | 1.664 | 1   |
| Hyp1719 | 1.969 | 0     | 1    | 3.359 | 0     | 0  | 3 | 1 | 35.0 | 2 | 1 | 2.309 | 1 | 2 | 2.937 | 5 | 1.829 | 4   |
| Hyp1720 | 2.122 | 0     | 1.5  | 2.449 | 0     | 0  | 2 | 1 | 48.0 | 2 | 1 | 1.821 | 1 | 2 | 2.109 | 6 | 1.552 | 4   |
| Hyp1738 | 2.222 | 0     | 0    | 2.898 | 0     | 0  | 2 | 1 | 49.0 | 2 | 1 | 2.271 | 2 | 2 | 3.559 | 5 | 1.446 | 1   |
| Hyp1739 | 2.537 | 0     | 0    | 3.228 | 0     | 0  | 3 | 1 | 50.3 | 2 | 1 | 2.131 | 2 | 3 | 3.170 | 4 | 1.323 | 1   |
| Hyp1817 | 3.819 | 0     | 6    | 4.895 | 0     | 9  | 1 | 1 | 48.8 | 2 | 0 | 2.453 | 2 | 3 | 7.395 | 2 | 2.045 | 3   |
| Hyp2052 | 3.510 | 0.012 | 7    | 4.127 | 0.015 | 6  | 1 | 1 | n/a  | 2 | 0 | 1.897 | 2 | 1 | 5.096 | 3 | 2.227 | 3   |
| Hyp2053 | 3.075 | 0.005 | 11   | 4.630 | 0.028 | 11 | 1 | 1 | 49.3 | 2 | 0 | 1.655 | 2 | 1 | 4.850 | 1 | 1.845 | 3   |
| Hyp2054 | 3.996 | 0.008 | 10.5 | 4.443 | 0     | 14 | 1 | 1 | n/a  | 2 | 1 | 1.701 | 2 | 1 | 7.167 | 3 | 2.299 | 3   |
| Hyp2055 | 2.684 | 0.014 | 10.5 | 4.210 | 0     | 20 | 1 | 1 | 52.0 | 2 | 0 | 2.021 | 2 | 1 | 3.648 | 1 | 2.167 | 3   |
| Hyp2056 | 4.677 | 0.006 | 9    | 6.248 | 0     | 7  | 1 | 1 | 48.0 | 2 | 0 | 1.954 | 2 | 3 | 5.330 | 1 | 1.947 | 3   |
| Hyp2099 | 1.793 | 0.006 | 2    | 2.079 | 0     | 1  | 2 | 1 | 46.8 | 2 | 1 | 2.075 | 1 | 2 | 2.096 | 6 | n/a   | n/a |
| Hyp2100 | 2.060 | 0.011 | 3    | 2.152 | 0.003 | 8  | 2 | 1 | 50.0 | 2 | 1 | 2.351 | 1 | 2 | 2.098 | 6 | 1.426 | 4   |
| Hyp2225 | 4.121 | 0.008 | 3    | 4.538 | 0.021 | 5  | 1 | 1 | 53.8 | 2 | 1 | 1.907 | 2 | 1 | 4.501 | 2 | 1.853 | 1   |
| Hyp2228 | 3.089 | 0     | 3    | 3.817 | 0.017 | 4  | 1 | 1 | 61.0 | 2 | 1 | 2.053 | 2 | 1 | 2.951 | 2 | 1.514 | 1   |

|         |       |       |     |       |       |    |   |   |      |   |   |       |   |   |        |   |       |     |
|---------|-------|-------|-----|-------|-------|----|---|---|------|---|---|-------|---|---|--------|---|-------|-----|
| Hyp2235 | 1.513 | 0     | 1   | 2.831 | 0.003 | 1  | 1 | 1 | n/a  | 2 | 1 | 2.222 | 2 | 1 | 5.232  | 2 | n/a   | n/a |
| Hyp2237 | 3.079 | 0.007 | 1.5 | 3.515 | 0     | 2  | 1 | 1 | n/a  | 2 | 1 | 2.096 | 2 | 1 | 4.798  | 2 | n/a   | n/a |
| Hyp2238 | 2.613 | 0.005 | 2   | 2.990 | 0     | 4  | 1 | 1 | 49.0 | 2 | 1 | 1.827 | 2 | 1 | 4.456  | 1 | n/a   | n/a |
| Hyp2250 | 2.737 | 0     | 0.5 | 2.971 | 0     | 0  | 2 | 1 | 48.2 | 2 | 1 | 2.332 | 1 | 2 | 2.257  | 6 | n/a   | n/a |
| Hyp2260 | 3.101 | 0.017 | 13  | 3.565 | 0.009 | 8  | 1 | 1 | 51.0 | 2 | 1 | 2.515 | 2 | 1 | 7.109  | 2 | n/a   | n/a |
| Hyp2261 | 2.137 | 0.001 | 6   | 3.387 | 0     | 13 | 1 | 1 | 49.2 | 2 | 0 | 2.107 | 2 | 1 | 5.367  | 4 | 1.726 | 1   |
| Hyp2262 | 1.826 | 0.010 | 0.5 | 2.946 | 0     | 1  | 2 | 1 | 48.0 | 2 | 1 | 2.538 | 1 | 2 | 2.333  | 6 | n/a   | n/a |
| Hyp2263 | 1.622 | 0.005 | 1   | 2.260 | 0.010 | 1  | 2 | 1 | 47.0 | 2 | 1 | 2.342 | 1 | 2 | 2.082  | 6 | n/a   | n/a |
| Hyp2266 | 2.007 | 0     | 0   | 2.303 | 0     | 0  | 2 | 1 | 46.0 | 2 | 1 | 1.646 | 1 | 2 | 2.053  | 6 | 1.490 | 4   |
| Hyp2302 | 3.446 | 0.032 | 22  | 3.655 | 0.081 | 33 | 1 | 1 | 41.6 | 2 | 1 | 2.020 | 2 | 3 | 7.336  | 2 | 1.522 | 1   |
| Hyp2759 | 2.169 | 0.005 | 0.5 | 2.584 | 0.020 | 2  | 3 | 1 | 30.0 | 2 | 1 | 2.145 | 2 | 1 | 2.449  | 6 | 1.481 | 1   |
| Hyp2913 | 2.863 | 0.017 | 3   | 3.285 | 0.023 | 1  | 1 | 1 | 60.0 | 3 | 1 | 2.292 | 2 | 1 | 6.320  | 2 | n/a   | n/a |
| Hyp2914 | 2.296 | 0.001 | 5.5 | 2.695 | 0.003 | 6  | 1 | 1 | 51.8 | 2 | 1 | 2.195 | 2 | 3 | 6.108  | 2 | n/a   | n/a |
| Hyp2915 | 2.121 | 0     | 7   | 2.610 | 0     | 4  | 1 | 1 | 59.0 | 2 | 1 | 2.135 | 2 | 3 | 11.177 | 2 | n/a   | n/a |
| Hyp2916 | 2.245 | 0.001 | 4.5 | 2.820 | 0     | 3  | 1 | 1 | 52.5 | 2 | 0 | 2.263 | 2 | 3 | 6.935  | 2 | n/a   | n/a |
| Hyp2917 | 2.366 | 0.010 | 8.5 | 2.526 | 0.029 | 9  | 1 | 1 | 54.5 | 2 | 1 | 2.254 | 2 | 1 | 4.133  | 2 | 1.669 | 1   |
| Hyp2918 | 2.548 | 0.004 | 4.5 | 3.587 | 0.009 | 7  | 1 | 1 | 53.0 | 2 | 1 | 2.340 | 2 | 1 | 5.923  | 2 | n/a   | n/a |
| Hyp2922 | 2.365 | 0.006 | 5.5 | 2.771 | 0.011 | 4  | 1 | 1 | 36.5 | 2 | 1 | 1.883 | 2 | 1 | 6.014  | 2 | n/a   | n/a |
| Hyp2923 | 3.171 | 0     | 3.5 | 3.549 | 0     | 6  | 1 | 1 | n/a  | 2 | 0 | 2.049 | 2 | 3 | 6.965  | 2 | 1.590 | 1   |
| Hyp2924 | 2.882 | 0.003 | 4.5 | 4.009 | 0.009 | 2  | 1 | 1 | 45.0 | 2 | 0 | 1.862 | 2 | 3 | 7.926  | 2 | n/a   | n/a |
| Hyp2925 | 2.454 | 0.005 | 3.5 | 3.050 | 0.002 | 2  | 1 | 1 | 48.8 | 2 | 1 | 1.819 | 2 | 1 | 6.336  | 2 | n/a   | n/a |
| Hyp2926 | 2.150 | 0.001 | 3.5 | 3.077 | 0.006 | 6  | 1 | 1 | 48.5 | 2 | 1 | 2.200 | 2 | 1 | 5.351  | 2 | n/a   | n/a |
| Hyp2928 | 2.498 | 0     | 17  | 3.031 | 0     | 17 | 1 | 0 | n/a  | 2 | 0 | 1.841 | 2 | 3 | 4.253  | 2 | n/a   | n/a |
| Hyp2929 | 3.348 | 0     | 6   | 3.245 | 0     | 14 | 1 | 0 | n/a  | 2 | 1 | 1.872 | 2 | 3 | 5.263  | 2 | n/a   | n/a |
| Hyp2932 | 4.824 | 0     | 16  | 3.962 | 0     | 19 | 1 | 1 | 50.3 | 2 | 1 | 2.122 | 2 | 3 | 5.195  | 2 | n/a   | n/a |
| Hyp2935 | 2.458 | 0     | 6   | 2.713 | 0     | 22 | 1 | 1 | 47.0 | 2 | 0 | 1.536 | 2 | 1 | 4.104  | 2 | n/a   | n/a |
| Hyp2936 | 2.781 | 0.004 | 3.5 | 3.699 | 0.014 | 0  | 1 | 1 | 46.8 | 2 | 0 | 1.756 | 2 | 1 | 5.640  | 2 | n/a   | n/a |
| Hyp2937 | 3.383 | 0     | 1   | 4.819 | 0     | 1  | 1 | 1 | 30.5 | 2 | 0 | 1.921 | 2 | 3 | 4.286  | 2 | n/a   | n/a |
| Hyp2938 | 2.838 | 0     | 1.5 | 3.181 | 0     | 1  | 1 | 1 | 33.0 | 2 | 0 | 1.996 | 2 | 1 | 4.349  | 2 | 1.738 | 3   |
| Hyp2939 | 2.767 | 0.006 | 4   | 4.468 | 0.019 | 0  | 1 | 1 | 30.0 | 2 | 0 | 1.916 | 2 | 3 | 8.742  | 2 | 1.637 | 3   |
| Hyp2940 | 2.823 | 0.006 | 0.5 | 4.378 | 0     | 1  | 1 | 1 | 36.8 | 2 | 0 | 1.937 | 2 | 3 | 5.456  | 2 | n/a   | n/a |
| Hyp2941 | 3.134 | 0     | 0   | 4.202 | 0.008 | 0  | 1 | 1 | 31.0 | 2 | 0 | 1.911 | 2 | 3 | 3.703  | 2 | 1.915 | 3   |
| Hyp2942 | 2.502 | 0.002 | 3   | 3.067 | 0     | 7  | 1 | 1 | 52.0 | 2 | 1 | 2.346 | 2 | 1 | 6.343  | 2 | 1.962 | 3   |

|         |       |       |      |       |       |    |   |   |      |   |   |       |   |   |       |   |       |     |
|---------|-------|-------|------|-------|-------|----|---|---|------|---|---|-------|---|---|-------|---|-------|-----|
| Hyp2943 | 3.756 | 0     | 7    | 4.625 | 0.006 | 8  | 1 | 1 | 51.0 | 2 | 0 | 2.009 | 2 | 1 | 6.785 | 2 | 2.420 | 3   |
| Hyp2944 | 3.330 | 0     | 14   | 4.010 | 0     | 20 | 1 | 1 | 45.0 | 2 | 1 | 1.538 | 2 | 1 | 4.853 | 2 | n/a   | n/a |
| Hyp2945 | 2.814 | 0     | 0    | 2.904 | 0     | 0  | 1 | 1 | 36.0 | 2 | 0 | 1.797 | 2 | 3 | 3.950 | 2 | 1.635 | 3   |
| Hyp2946 | 3.242 | 0     | 6.5  | 4.703 | 0     | 14 | 1 | 1 | 37.3 | 2 | 0 | 2.315 | 2 | 3 | 5.441 | 2 | 1.925 | 1   |
| Hyp2947 | 2.987 | 0.006 | 11   | 5.038 | 0     | 10 | 1 | 1 | 48.5 | 2 | 0 | 2.107 | 2 | 1 | 4.888 | 2 | n/a   | n/a |
| Hyp2948 | 3.174 | 0.011 | 12.5 | 4.012 | 0.007 | 9  | 1 | 1 | n/a  | 2 | 0 | 1.835 | 2 | 3 | 5.460 | 2 | n/a   | n/a |
| Hyp2949 | 4.056 | 0.004 | 1    | 4.229 | 0     | 9  | 1 | 1 | 50.0 | 2 | 0 | 2.020 | 2 | 3 | 5.007 | 3 | n/a   | n/a |
| Hyp2950 | 3.470 | 0.011 | 5    | 5.621 | 0.016 | 14 | 1 | 1 | 47.5 | 2 | 0 | 1.617 | 2 | 1 | 5.360 | 3 | n/a   | n/a |
| Hyp2953 | 2.793 | 0.003 | 17   | 3.786 | 0.009 | 10 | 1 | 1 | 53.8 | 2 | 0 | 2.033 | 2 | 1 | 3.658 | 1 | n/a   | n/a |
| Hyp2954 | 2.303 | 0     | 3    | 3.158 | 0     | 5  | 1 | 1 | 47.5 | 2 | 0 | 2.121 | 2 | 3 | 5.219 | 2 | 2.003 | 3   |
| Hyp2972 | 2.581 | 0.008 | 14.5 | 2.705 | 0.008 | 26 | 1 | 1 | 45.5 | 2 | 0 | 1.769 | 2 | 1 | 4.449 | 3 | n/a   | n/a |
| Hyp2973 | 2.434 | 0.003 | 17   | 2.701 | 0.009 | 20 | 1 | 1 | 47.0 | 2 | 0 | 1.919 | 2 | 3 | 4.605 | 3 | 2.152 | 1   |
| Hyp2974 | 3.412 | 0.014 | 21.5 | 3.192 | 0     | 7  | 1 | 1 | n/a  | 2 | 0 | 1.967 | 2 | 3 | 5.615 | 3 | n/a   | n/a |
| Hyp2976 | 2.549 | 0.008 | 8.5  | 2.608 | 0.011 | 20 | 1 | 1 | n/a  | 2 | 0 | 1.716 | 2 | 1 | 5.429 | 3 | n/a   | n/a |
| Hyp2977 | 3.294 | 0.015 | 11   | 2.978 | 0.013 | 18 | 1 | 1 | 33.6 | 2 | 0 | 1.718 | 2 | 1 | 5.462 | 2 | n/a   | n/a |
| Hyp2978 | 3.410 | 0.004 | 9    | 2.369 | 0     | 13 | 1 | 1 | 33.3 | 2 | 1 | 1.864 | 2 | 1 | 6.633 | 2 | n/a   | n/a |
| Hyp2979 | 2.541 | 0.006 | 32.5 | 2.683 | 0.007 | 17 | 1 | 1 | 25.0 | 3 | 0 | 1.834 | 2 | 3 | 5.214 | 3 | n/a   | n/a |
| Hyp2980 | 2.262 | 0.010 | 8.5  | 2.295 | 0     | 11 | 1 | 1 | n/a  | 2 | 0 | 1.623 | 2 | 3 | 5.279 | 3 | n/a   | n/a |
| Hyp2982 | 3.425 | 0.062 | 12   | 4.051 | 0.076 | 13 | 1 | 1 | n/a  | 3 | 0 | 2.019 | 2 | 1 | 7.530 | 2 | 1.510 | 2   |
| Hyp2983 | 2.225 | 0.015 | 13.5 | 2.598 | 0.011 | 24 | 1 | 1 | 31.5 | 3 | 0 | 1.727 | 2 | 1 | 5.600 | 3 | n/a   | n/a |
| Hyp2984 | 2.070 | 0.001 | 10.5 | 2.015 | 0     | 10 | 1 | 1 | n/a  | 3 | 0 | 1.805 | 2 | 1 | 5.276 | 1 | n/a   | n/a |
| Hyp2985 | 1.827 | 0.016 | 10.5 | 3.620 | 0     | 16 | 1 | 1 | n/a  | 3 | 0 | 1.819 | 2 | 1 | 5.097 | 1 | n/a   | n/a |
| Hyp2991 | 2.312 | 0.001 | 6.5  | 2.333 | 0.003 | 20 | 1 | 1 | 47.0 | 3 | 0 | 1.950 | 2 | 1 | 5.489 | 1 | n/a   | n/a |
| Hyp2993 | 2.264 | 0.005 | 6    | 2.501 | 0     | 12 | 1 | 1 | 41.5 | 2 | 0 | 1.927 | 2 | 3 | 5.604 | 2 | n/a   | n/a |
| Hyp2994 | 2.387 | 0.006 | 22.5 | 2.596 | 0     | 14 | 1 | 1 | 51.5 | 3 | 0 | 2.081 | 2 | 1 | 5.295 | 1 | n/a   | n/a |
| Hyp2995 | 2.723 | 0.004 | 18.5 | 3.177 | 0     | 13 | 1 | 1 | 47.3 | 3 | 0 | 2.114 | 2 | 3 | 6.023 | 1 | n/a   | n/a |
| Hyp2996 | 2.450 | 0.002 | 8.5  | 2.755 | 0.005 | 11 | 1 | 1 | 48.8 | 3 | 0 | 2.298 | 2 | 1 | 5.729 | 2 | n/a   | n/a |
| Hyp2997 | 2.399 | 0.006 | 10.5 | 2.926 | 0     | 20 | 1 | 1 | 50.8 | 3 | 0 | 2.132 | 2 | 1 | 5.242 | 1 | n/a   | n/a |
| Hyp2998 | 2.224 | 0.005 | 9    | 2.526 | 0.003 | 9  | 1 | 1 | 50.5 | 2 | 0 | 2.261 | 2 | 1 | 5.802 | 1 | n/a   | n/a |
| Hyp2999 | 2.354 | 0.012 | 15   | 2.356 | 0     | 22 | 1 | 1 | 52.3 | 2 | 0 | 2.182 | 2 | 3 | 5.304 | 1 | n/a   | n/a |
| Hyp3560 | 2.047 | 0.002 | 8    | 2.554 | 0     | 9  | 1 | 1 | 50.7 | 2 | 0 | 1.910 | 2 | 1 | 4.984 | 1 | n/a   | n/a |
| Hyp3561 | 2.361 | 0.003 | 6.5  | 2.638 | 0.005 | 9  | 1 | 1 | 48.3 | 2 | 0 | 1.910 | 2 | 1 | 4.648 | 1 | 1.581 | 1   |
| Hyp3562 | 2.495 | 0.028 | 2    | 3.094 | 0.109 | 2  | 1 | 1 | 48.3 | 3 | 1 | 1.978 | 2 | 2 | 5.007 | 2 | 1.424 | 1   |

|         |       |       |      |       |       |    |   |   |      |   |   |       |   |   |       |   |       |     |
|---------|-------|-------|------|-------|-------|----|---|---|------|---|---|-------|---|---|-------|---|-------|-----|
| Hyp3563 | 1.765 | 0.003 | 3.5  | 2.270 | 0.026 | 4  | 1 | 1 | 49.5 | 2 | 1 | 1.968 | 2 | 1 | 4.125 | 1 | 1.519 | 3   |
| Hyp3564 | 2.414 | 0.025 | 1.5  | 2.970 | 0.012 | 1  | 1 | 1 | n/a  | 3 | 1 | 2.084 | 2 | 2 | 3.921 | 1 | n/a   | n/a |
| Hyp3565 | 2.360 | 0.001 | 1    | 2.693 | 0.059 | 3  | 1 | 1 | 55.5 | 3 | 1 | 2.160 | 2 | 2 | 5.404 | 2 | n/a   | n/a |
| Hyp3566 | 2.262 | 0.053 | 1    | 3.143 | 0.078 | 3  | 1 | 1 | n/a  | 3 | 1 | 1.962 | 2 | 2 | 3.997 | 1 | n/a   | n/a |
| Hyp3567 | 2.510 | 0.008 | 7    | 2.196 | 0     | 6  | 1 | 1 | 50.5 | 3 | 1 | 2.046 | 2 | 1 | 4.390 | 1 | n/a   | n/a |
| Hyp3569 | 2.800 | 0.015 | 5    | 4.353 | 0.026 | 9  | 1 | 1 | n/a  | 3 | 0 | 2.017 | 2 | 3 | 6.287 | 1 | n/a   | n/a |
| Hyp3570 | 2.679 | 0.016 | 7    | 3.838 | 0     | 8  | 1 | 1 | n/a  | 2 | 0 | 2.224 | 2 | 1 | 5.783 | 1 | n/a   | n/a |
| Hyp3571 | 2.861 | 0.024 | 10   | 3.460 | 0     | 12 | 1 | 1 | n/a  | 2 | 1 | 1.926 | 2 | 1 | 3.856 | 1 | n/a   | n/a |
| Hyp3572 | 2.698 | 0.005 | 4.5  | 3.114 | 0     | 14 | 1 | 1 | n/a  | 3 | 1 | 2.752 | 2 | 1 | 5.576 | 1 | n/a   | n/a |
| Hyp3573 | 2.309 | 0.007 | 13   | 2.534 | 0.018 | 8  | 1 | 1 | n/a  | 2 | 0 | 1.936 | 2 | 1 | 5.385 | 2 | n/a   | n/a |
| Hyp3575 | 3.382 | 0.007 | 5    | 2.801 | 0     | 14 | 1 | 0 | n/a  | 3 | 1 | 1.471 | 2 | 3 | 3.398 | 4 | n/a   | n/a |
| Hyp3576 | 1.851 | 0.007 | 2    | 2.144 | 0     | 7  | 1 | 1 | n/a  | 3 | 1 | 1.839 | 2 | 1 | 4.479 | 1 | n/a   | n/a |
| Hyp3577 | 3.186 | 0     | 11.5 | 3.262 | 0     | 20 | 1 | 1 | 47.0 | 2 | 0 | 1.908 | 2 | 3 | 5.381 | 2 | n/a   | n/a |
| Hyp3794 | 3.130 | 0.003 | 4.5  | 2.472 | 0     | 9  | 1 | 1 | 52.0 | 2 | 1 | 2.664 | 2 | 1 | 4.901 | 1 | 1.839 | 1   |
| Hyp4002 | 2.950 | 0.009 | 3    | 3.715 | 0     | 6  | 1 | 1 | n/a  | 2 | 1 | 2.109 | 2 | 1 | 7.105 | 2 | n/a   | n/a |
| Hyp4003 | 1.888 | 0     | 6.5  | 2.178 | 0     | 4  | 1 | 1 | n/a  | 2 | 0 | 1.849 | 2 | 1 | 5.040 | 1 | n/a   | n/a |
| Hyp4004 | 2.392 | 0.005 | 3.5  | 3.995 | 0.006 | 3  | 1 | 1 | n/a  | 2 | 1 | 2.445 | 2 | 1 | 6.911 | 2 | n/a   | n/a |
| Hyp4005 | 3.751 | 0.010 | 3    | 4.664 | 0.034 | 4  | 1 | 1 | n/a  | 2 | 1 | 1.937 | 2 | 1 | 9.249 | 2 | n/a   | n/a |
| Hyp4006 | 2.619 | 0.001 | 2    | 3.357 | 0     | 4  | 1 | 1 | 43.5 | 2 | 1 | 1.981 | 2 | 1 | 6.556 | 2 | n/a   | n/a |
| Hyp4007 | 2.709 | 0.004 | 2.5  | 3.648 | 0.008 | 3  | 1 | 1 | n/a  | 2 | 1 | 2.421 | 2 | 1 | 6.716 | 2 | n/a   | n/a |
| Hyp4008 | 3.644 | 0.007 | 4    | 4.325 | 0.020 | 4  | 1 | 1 | 48.0 | 2 | 1 | 2.202 | 2 | 1 | 6.937 | 2 | n/a   | n/a |
| Hyp4009 | 1.965 | 0     | 5    | 2.660 | 0     | 5  | 1 | 1 | 32.3 | 2 | 0 | 2.081 | 2 | 1 | 5.539 | 1 | n/a   | n/a |
| Hyp4010 | 3.364 | 0.002 | 3.5  | 4.380 | 0.016 | 6  | 1 | 1 | 46.0 | 2 | 1 | 2.187 | 2 | 1 | 8.139 | 2 | n/a   | n/a |
| Hyp4011 | 3.108 | 0     | 3    | 4.141 | 0.007 | 3  | 1 | 1 | 51.0 | 2 | 0 | 2.617 | 2 | 1 | 4.524 | 1 | n/a   | n/a |
| Hyp4012 | 3.131 | 0.006 | 7    | 4.091 | 0.010 | 5  | 1 | 1 | 46.0 | 2 | 1 | 2.673 | 2 | 1 | 4.348 | 2 | n/a   | n/a |
| Hyp4013 | 4.577 | 0.008 | 1    | 4.688 | 0     | 7  | 1 | 1 | 38.0 | 2 | 0 | 2.416 | 2 | 3 | 8.331 | 2 | n/a   | n/a |
| Hyp4014 | 3.603 | 0.005 | 5    | 3.783 | 0     | 14 | 1 | 1 | 45.0 | 2 | 0 | 2.650 | 2 | 1 | 5.495 | 2 | n/a   | n/a |
| Hyp4015 | 3.930 | 0.003 | 3.5  | 5.565 | 0     | 1  | 1 | 1 | 44.4 | 2 | 0 | 2.573 | 2 | 3 | 7.510 | 2 | n/a   | n/a |
| Hyp4016 | 4.670 | 0.004 | 3    | 5.509 | 0.022 | 3  | 1 | 1 | 35.8 | 2 | 0 | 2.412 | 2 | 3 | 8.306 | 2 | n/a   | n/a |
| Hyp4017 | 4.437 | 0     | 2.5  | 5.080 | 0     | 1  | 1 | 1 | 54.0 | 2 | 0 | 2.326 | 2 | 1 | 6.604 | 2 | n/a   | n/a |
| Hyp4018 | 3.425 | 0     | 1.5  | 3.596 | 0     | 2  | 1 | 1 | n/a  | 2 | 0 | 2.811 | 2 | 3 | 5.196 | 1 | n/a   | n/a |
| Hyp4019 | 4.664 | 0     | 1    | 4.686 | 0     | 3  | 1 | 1 | n/a  | 2 | 0 | 2.628 | 2 | 3 | 6.704 | 1 | n/a   | n/a |
| Hyp4020 | 4.196 | 0     | 1    | 4.189 | 0     | 3  | 1 | 1 | 47.5 | 2 | 0 | 3.101 | 2 | 1 | 7.509 | 1 | n/a   | n/a |

|         |       |       |      |       |       |    |   |   |      |   |   |       |   |   |       |   |       |     |
|---------|-------|-------|------|-------|-------|----|---|---|------|---|---|-------|---|---|-------|---|-------|-----|
| Hyp4021 | 4.008 | 0     | 6    | 4.692 | 0     | 6  | 1 | 1 | n/a  | 2 | 1 | 1.952 | 2 | 1 | 5.310 | 4 | n/a   | n/a |
| Hyp4022 | 3.355 | 0     | 7    | 4.479 | 0     | 15 | 1 | 1 | n/a  | 2 | 1 | 2.030 | 2 | 1 | 5.161 | 4 | n/a   | n/a |
| Hyp4023 | 3.302 | 0     | 9.5  | 4.172 | 0     | 6  | 1 | 1 | 50.0 | 2 | 1 | 2.085 | 2 | 1 | 4.589 | 2 | n/a   | n/a |
| Hyp4024 | 3.283 | 0.002 | 9.5  | 4.795 | 0     | 15 | 1 | 1 | 43.8 | 2 | 1 | 2.149 | 2 | 1 | 5.815 | 2 | n/a   | n/a |
| Hyp4025 | 3.675 | 0     | 9.5  | 4.848 | 0     | 6  | 1 | 1 | 57.0 | 2 | 1 | 2.045 | 2 | 1 | 5.403 | 2 | n/a   | n/a |
| Hyp4026 | 3.805 | 0     | 18   | 4.048 | 0     | 10 | 1 | 1 | 52.5 | 2 | 1 | 2.162 | 2 | 1 | 4.706 | 3 | n/a   | n/a |
| Hyp4027 | 3.431 | 0     | 10.5 | 3.996 | 0     | 9  | 1 | 1 | 53.5 | 2 | 0 | 1.982 | 2 | 1 | 4.340 | 2 | n/a   | n/a |
| Hyp4028 | 2.914 | 0     | 12   | 3.735 | 0     | 15 | 1 | 1 | 50.5 | 2 | 0 | 2.000 | 2 | 1 | 5.050 | 2 | n/a   | n/a |
| Hyp4029 | 3.364 | 0.006 | 12.5 | 3.404 | 0     | 14 | 1 | 1 | n/a  | 2 | 0 | 2.128 | 2 | 1 | 5.683 | 3 | n/a   | n/a |
| Hyp4030 | 4.412 | 0.003 | 5.5  | 4.282 | 0.003 | 7  | 1 | 1 | 47.8 | 2 | 1 | 2.394 | 2 | 1 | 7.293 | 2 | n/a   | n/a |
| Hyp4031 | 2.810 | 0.009 | 4.5  | 4.782 | 0.007 | 3  | 1 | 1 | 54.6 | 2 | 0 | 2.079 | 2 | 1 | 4.032 | 4 | 2.713 | 3   |
| Hyp4032 | 2.970 | 0.015 | 4    | 3.400 | 0     | 2  | 1 | 1 | 46.0 | 2 | 0 | 1.890 | 2 | 1 | 4.853 | 4 | n/a   | n/a |
| Hyp4033 | 2.544 | 0     | 1    | 5.420 | 0     | 3  | 1 | 1 | 51.8 | 2 | 0 | 1.903 | 2 | 3 | 4.735 | 4 | n/a   | n/a |
| Hyp4034 | 3.243 | 0.003 | 3.5  | 4.004 | 0     | 2  | 1 | 1 | 44.8 | 2 | 0 | 2.006 | 2 | 1 | 4.616 | 4 | n/a   | n/a |
| Hyp4035 | 3.674 | 0     | 4    | 4.646 | 0     | 4  | 1 | 1 | 48.4 | 2 | 0 | 2.116 | 2 | 1 | 4.405 | 4 | n/a   | n/a |
| Hyp4036 | 4.039 | 0     | 10.5 | 5.150 | 0     | 6  | 1 | 1 | 54.5 | 2 | 0 | 2.251 | 2 | 3 | 6.481 | 2 | n/a   | n/a |
| Hyp4037 | 4.067 | 0     | 10   | 4.489 | 0     | 16 | 1 | 1 | 50.6 | 2 | 0 | 2.203 | 2 | 3 | 5.852 | 2 | n/a   | n/a |
| Hyp4038 | 3.468 | 0.003 | 1    | 5.454 | 0     | 1  | 1 | 1 | 47.0 | 2 | 0 | 2.114 | 2 | 1 | 4.609 | 4 | n/a   | n/a |
| Hyp4039 | 3.479 | 0.003 | 14.5 | 3.781 | 0     | 11 | 1 | 1 | n/a  | 2 | 0 | 2.353 | 2 | 1 | 4.706 | 1 | n/a   | n/a |
| Hyp4040 | 2.915 | 0.004 | 2    | 4.412 | 0.013 | 3  | 1 | 1 | 50.5 | 2 | 0 | 2.074 | 2 | 3 | 3.919 | 4 | n/a   | n/a |
| Hyp4044 | 2.391 | 0     | 2    | 3.338 | 0.004 | 2  | 1 | 1 | 51.0 | 2 | 0 | 2.257 | 2 | 3 | 5.602 | 2 | n/a   | n/a |
| Hyp4083 | 4.064 | 0     | 10   | 5.135 | 0     | 6  | 1 | 1 | 45.8 | 2 | 0 | 1.922 | 2 | 1 | 8.146 | 2 | n/a   | n/a |
| Hyp4143 | 3.698 | 0     | 2.5  | 4.138 | 0     | 4  | 1 | 1 | 49.4 | 2 | 0 | 2.250 | 2 | 1 | 6.659 | 2 | 1.748 | 1   |
| Hyp4173 | 1.609 | 0.001 | 2.5  | 1.863 | 0     | 4  | 1 | 1 | 48.8 | 2 | 0 | 1.745 | 2 | 1 | 5.542 | 1 | n/a   | n/a |
| Hyp4184 | 2.269 | 0.040 | 10.5 | 3.180 | 0.067 | 13 | 1 | 1 | 39.0 | 2 | 1 | 1.854 | 2 | 1 | 6.074 | 2 | n/a   | n/a |
| Hyp4204 | 2.919 | 0     | 7    | 3.906 | 0     | 24 | 1 | 1 | 49.5 | 2 | 0 | 2.367 | 2 | 3 | 4.632 | 1 | n/a   | n/a |
| Hyp4214 | 3.953 | 0.001 | 4.5  | 4.932 | 0     | 6  | 1 | 1 | 44.8 | 2 | 0 | 2.042 | 2 | 1 | 7.010 | 2 | 2.232 | 3   |
