# Supplementary material
Source: PubMed Central journal article supplement (PMC3662511)
Supplement: supp_mct065_mct065supp_table4.pdf [file supp_mct065_mct065supp_table4.pdf]

## SUPPLEMENTARY DATA

TABLE S4. CpDNA sequence accession codes for the 21 haplotypes from Genebank with the following order for the three scored fragments: (1) *psbB-psbH* (*psbB*, *psbT*, *psbT-psbN* intergenic spacer, *psbN*, *psbN-psbH* intergenic spacer); (2) *trnL* intron; and (3) *trnS-ycf9* (*trnS*, *trnS-psbZ* intergenic spacer, *psbZ*, *ycf9*).

| cpDNA haplotype                                   | GenBank accession numbers    |
|---------------------------------------------------|------------------------------|
| HA01; <i>H. attenuatum</i>                        | JF734846, JF734855, JF734868 |
| HE01; <i>H. erectum</i>                           | JF734847, JF734856, JF734869 |
| HG01; <i>H. gracillimum</i>                       | JF734848, JF734857, JF734870 |
| HI01; <i>H. pibairense</i>                        | JF734849, JF734858, JF734871 |
| HK01; <i>H. kamchatikum</i>                       | JF734848, JF734859, JF734870 |
| HM01                                              | JF734850, JF734860, JF734872 |
| HM02                                              | JF734850, JF734860, JF734873 |
| HM03                                              | JF734852, JF734860, JF734873 |
| HM04                                              | JF734850, JF734860, JF734874 |
| HO01; <i>H. oliganthum</i>                        | JF734851, JF734861, JF734875 |
| HP01                                              | JF734852, JF734862, JF734872 |
| HP02                                              | JF734852, JF734862, JF734876 |
| HP03                                              | JF734852, JF734862, JF734877 |
| HP04                                              | JF734853, JF734863, JF734878 |
| HP05                                              | JF734853, JF734864, JF734878 |
| HP06                                              | JF734853, JF734863, JF734879 |
| HP07                                              | JF734853, JF734865, JF734879 |
| HP08                                              | JF734853, JF734866, JF734880 |
| HP09                                              | JF734853, JF734862, JF734878 |
| HP10                                              | JF734862, JF734850, JF734881 |
| HT01; <i>H. tetrapterum</i> , <i>H. undulatum</i> | JF734854, JF734867, JF734882 |
